# Supplementary material for: Synthesis of 1H-isothiochromenes by regioselective C–C and C–S bond formation of enaminothiones with alkynes under rhodium catalysis
Source: Royal Society of Chemistry journal article supplement (doi:10.1039/d5cc01269d), 2025-01-01

## Supporting Information

### Synthesis of 1*H*-Isothiochromenes by Regioselective C–C and C–S Bonds Formation of Enaminothiones with Alkynes under Rhodium Catalysis

Kelu Yan,<sup>\*,a</sup> Yuhang Sun,<sup>a</sup> Jiangwei Wen,<sup>a</sup> Qiuyun Li,<sup>b</sup> Xinming Yu,<sup>a</sup> Wenxu  
Shang,<sup>a</sup> and Xiu Wang<sup>a</sup>

<sup>a</sup> Key Laboratory of Life-Organic Analysis of Shandong Province, School of Chemistry and  
Chemical Engineering, Qufu Normal University, Qufu, Shandong 273165, China

<sup>b</sup> Faculty of Chemistry and Chemical Engineering, Yancheng Institute of Technology,  
Yancheng, Jiangsu 224051, China

E-mail: [yankelu317@163.com](mailto:yankelu317@163.com)

## Contents

|                                                                                                      |         |
|------------------------------------------------------------------------------------------------------|---------|
| Table of Contents                                                                                    | S2      |
| 1. Experimental Section: General Considerations                                                      | S3      |
| 2. Optimization Studies                                                                              | S3–S7   |
| (a) Table S1. Optimization Studies                                                                   | S3–S5   |
| (b) Table S2. Optimization Studies Catalyzed by [( <i>p</i> -cymene)RuCl <sub>2</sub> ] <sub>2</sub> | S5–S7   |
| 3. Synthetic Procedures                                                                              | S7–S10  |
| (a) General Procedure for the Preparation of <b>1</b>                                                | S7      |
| (b) General Procedure for the Rh(III)-Catalyzed Preparation of <b>3</b>                              | S7      |
| (c) Gram-Scale Preparation of <b>3aa</b>                                                             | S7–S8   |
| (d) Condensation Reaction of <b>3aa</b> for the Preparation of <b>5</b>                              | S8      |
| (e) Condensation Reaction of <b>3aa</b> for the Preparation of <b>7</b>                              | S8–S9   |
| (f) Condensation Reaction of <b>3aa</b> for the Preparation of <b>9</b>                              | S9      |
| (g) Condensation Reaction of <b>3aa</b> for the Preparation of <b>11</b>                             | S9–S10  |
| 4. Characterization of <b>3</b> , <b>5</b> , <b>7</b> , <b>9</b> and <b>11</b>                       | S10–S24 |
| 5. X-ray Crystallography of <b>3aa</b>                                                               | S24–S25 |
| 6. Mechanism Research                                                                                | S26–S30 |
| (a) Competition KIE Experiments                                                                      | S26–S27 |
| (b) Parallel KIE Experiments                                                                         | S27–S28 |
| (c) Competition Experiment of <b>1b</b> and <b>1h</b>                                                | S28–S29 |
| (d) Competition Experiment of <b>2b</b> and <b>2g</b>                                                | S29–S30 |
| 7. References                                                                                        | S31     |
| 8. NMR Spectra                                                                                       | S32–S73 |

## 1. Experimental Section:

**General Considerations.** All products were prepared under argon atmosphere using standard Schlenk technique.  $^1\text{H}$ ,  $^{13}\text{C}$  and  $^{19}\text{F}$  NMR data were recorded with Bruker Advance III (500 MHz) spectrometers with tetramethylsilane as an internal standard. All chemical shifts ( $\delta$ ) are reported in ppm and coupling constants ( $J$ ) in Hz. All chemical shifts are reported relative to tetramethylsilane and d-solvent peaks, respectively. Multiplicities are reported as follows: singlet (s), doublet (d), doublet of doublets (dd), triplet (t), quartet (q), and multiplet (m). Column chromatography was performed on silica gel 200–300 mesh. Analytical thin-layer chromatography (TLC) was performed on pre-coated, glass-backed silica gel plates. Visualization of the developed chromatogram was performed by UV absorbance (254 nm). High-resolution mass spectrometry (HRMS) were done on an electrospray ionization (ESI) Fourier transform mass spectrometer (FTMS, Thermo QExactive Focus). X-ray diffraction (XRD) patterns were recorded on a Rigaku smartlab system at 45 kV and 200 mA with Cu-K $\alpha$  radiation.  $[\text{Cp}^*\text{MCl}_2]_2$  ( $\text{M} = \text{Rh}/\text{Ir}$ ) was prepared from  $\text{MCl}_3 \cdot x\text{H}_2\text{O}$  ( $\text{M} = \text{Rh}/\text{Ir}$ ) following a literature procedure.<sup>1</sup> Unless otherwise noted below, all other compounds have been reported in the literature or are commercially available from Aldrich, Acros, Alfa Aesar, and Energy Chemical Company and used as received without any further purification.

## 2. Optimization Studies

(a) Table S1. Optimization Studies<sup>a</sup>

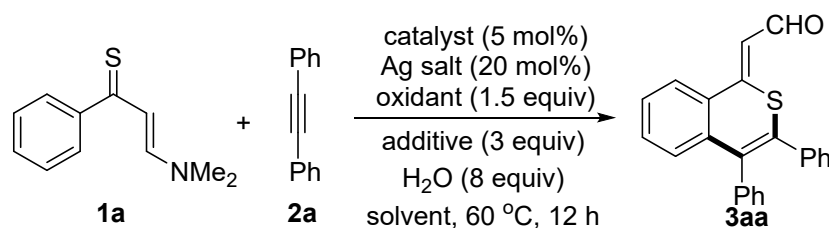

| entry | catalyst                       | Ag salt          | oxidant                   | additive | solvent | yield <sup>b</sup><br>(%) |
|-------|--------------------------------|------------------|---------------------------|----------|---------|---------------------------|
| 1     | $[\text{Cp}^*\text{RhCl}_2]_2$ | $\text{AgSbF}_6$ | $\text{Cu}(\text{OAc})_2$ | HOAc     | DCE     | 74                        |
| 2     | $[\text{Cp}^*\text{RhCl}_2]_2$ | $\text{AgBF}_4$  | $\text{Cu}(\text{OAc})_2$ | HOAc     | DCE     | 48                        |
| 3     | $[\text{Cp}^*\text{RhCl}_2]_2$ | $\text{AgOTf}$   | $\text{Cu}(\text{OAc})_2$ | HOAc     | DCE     | 71                        |

|          |                                                          |                          |                      |                           |                   |                 |
|----------|----------------------------------------------------------|--------------------------|----------------------|---------------------------|-------------------|-----------------|
| 4        | [Cp*RhCl <sub>2</sub> ] <sub>2</sub>                     | AgNTf <sub>2</sub>       | Cu(OAc) <sub>2</sub> | HOAc                      | DCE               | 65              |
| 5        | [Cp*RhCl <sub>2</sub> ] <sub>2</sub>                     | -                        | Cu(OAc) <sub>2</sub> | HOAc                      | DCE               | 0               |
| <b>6</b> | <b>[Cp*RhCl<sub>2</sub>]<sub>2</sub></b>                 | <b>AgSbF<sub>6</sub></b> | <b>AgOAc</b>         | <b>HOAc</b>               | <b>DCE</b>        | <b>82</b>       |
| 7        | [Cp*RhCl <sub>2</sub> ] <sub>2</sub>                     | AgSbF <sub>6</sub>       | AgCO <sub>3</sub>    | HOAc                      | DCE               | 61              |
| 8        | [Cp*RhCl <sub>2</sub> ] <sub>2</sub>                     | AgSbF <sub>6</sub>       | Ag <sub>2</sub> O    | HOAc                      | DCE               | 27              |
| 9        | [Cp*RhCl <sub>2</sub> ] <sub>2</sub>                     | AgSbF <sub>6</sub>       | AgOAc                | TFA                       | DCE               | 0               |
| 10       | [Cp*RhCl <sub>2</sub> ] <sub>2</sub>                     | AgSbF <sub>6</sub>       | AgOAc                | PivOH                     | DCE               | 74              |
| 11       | [Cp*RhCl <sub>2</sub> ] <sub>2</sub>                     | AgSbF <sub>6</sub>       | AgOAc                | MesCO <sub>2</sub> H      | DCE               | 61              |
| 12       | [Cp*RhCl <sub>2</sub> ] <sub>2</sub>                     | AgSbF <sub>6</sub>       | AgOAc                | 1-<br>AdCO <sub>2</sub> H | DCE               | 77              |
| 13       | [Cp*RhCl <sub>2</sub> ] <sub>2</sub>                     | AgSbF <sub>6</sub>       | AgOAc                | HOAc                      | DCM               | 70              |
| 14       | [Cp*RhCl <sub>2</sub> ] <sub>2</sub>                     | AgSbF <sub>6</sub>       | AgOAc                | HOAc                      | CHCl <sub>3</sub> | 66              |
| 15       | [Cp*RhCl <sub>2</sub> ] <sub>2</sub>                     | AgSbF <sub>6</sub>       | AgOAc                | HOAc                      | MeOH              | 35              |
| 16       | [Cp*RhCl <sub>2</sub> ] <sub>2</sub>                     | AgSbF <sub>6</sub>       | AgOAc                | HOAc                      | toluene           | 42              |
| 17       | [Cp*RhCl <sub>2</sub> ] <sub>2</sub>                     | AgSbF <sub>6</sub>       | AgOAc                | HOAc                      | MeCN              | 17              |
| 18       | [( <i>p</i> -<br>cymene)RuCl <sub>2</sub> ] <sub>2</sub> | AgSbF <sub>6</sub>       | AgOAc                | HOAc                      | DCE               | 55              |
| 19       | [Cp*IrCl <sub>2</sub> ] <sub>2</sub>                     | AgSbF <sub>6</sub>       | AgOAc                | HOAc                      | DCE               | 0               |
| 20       | Cp*Co(CO)I <sub>2</sub>                                  | AgSbF <sub>6</sub>       | AgOAc                | HOAc                      | DCE               | 0               |
| 21       | [Cp*RhCl <sub>2</sub> ] <sub>2</sub>                     | AgSbF <sub>6</sub>       | AgOAc                | HOAc                      | DCE               | 71 <sup>c</sup> |
| 22       | [Cp*RhCl <sub>2</sub> ] <sub>2</sub>                     | AgSbF <sub>6</sub>       | AgOAc                | HOAc                      | DCE               | 79 <sup>d</sup> |
| 23       | [Cp*RhCl <sub>2</sub> ] <sub>2</sub>                     | AgSbF <sub>6</sub>       | AgOAc                | HOAc                      | DCE               | 74 <sup>e</sup> |
| 24       | [Cp*RhCl <sub>2</sub> ] <sub>2</sub>                     | AgSbF <sub>6</sub>       | AgOAc                | HOAc                      | DCE               | 81 <sup>f</sup> |
| 25       | [Cp*RhCl <sub>2</sub> ] <sub>2</sub>                     | AgSbF <sub>6</sub>       | AgOAc                | HOAc                      | DCE               | 7 <sup>g</sup>  |

<sup>a</sup> Reaction conditions: **1a** (0.2 mmol), **2a** (0.3 mmol), catalyst (5 mol%), Ag salt (20 mol%), oxidant (1.5 equiv), additive (3 equiv), H<sub>2</sub>O (8 equiv), solvent (1.5 mL), 60 °C, 12 h, under N<sub>2</sub>. <sup>b</sup> Isolated yields. <sup>c</sup> HOAc (2 equiv). <sup>d</sup> HOAc (4 equiv). <sup>e</sup> H<sub>2</sub>O (6 equiv). <sup>f</sup> H<sub>2</sub>O (10 equiv). <sup>g</sup> without H<sub>2</sub>O.

Initially, (*E*)-3-(dimethylamino)-1-phenylprop-2-ene-1-thione (**1a**) (0.2 mmol, 1.0 equiv) was introduced to react with 1,2-diphenylethyne (**2a**) (0.3 mmol, 1.5 equiv)

accompanied by  $[\text{Cp}^*\text{RhCl}_2]_2$  (5 mol%),  $\text{AgSbF}_6$  (20 mol%),  $\text{Cu}(\text{OAc})_2$  (1.5 equiv),  $\text{HOAc}$  (3 equiv), and  $\text{H}_2\text{O}$  (8 equiv) in 1,2-dichloroethane (DCE) at 60 °C under nitrogen atmosphere for 12 h. The target product (*Z*)-2-(3,4-diphenyl-1*H*-isothiochromen-1-ylidene)acetaldehyde (**3aa**) was achieved with a yield of 74% (Table S1, entry 1). Then, several other Ag salts including  $\text{AgBF}_4$ ,  $\text{AgOTf}$ , and  $\text{AgNTf}_2$  were tested, and generated **3aa** in 48–71% yields (entries 2–4). The reaction without the participation of silver salt failed to generate product **3aa** (entry 5). When the oxidant was replaced by  $\text{AgOAc}$ ,  $\text{AgCO}_3$ , and  $\text{Ag}_2\text{O}$ , the product **3aa** could be obtained in 27–82% yields (entries 6–8). The yields of **3aa** generated from reactions involving other additives such as 2,2,2-trifluoroacetic acid (TFA),  $\text{PivOH}$ ,  $\text{MesCO}_2\text{H}$ , and 1- $\text{AdCO}_2\text{H}$  were not higher than 77% (entries 9–12). Tests on solvents showed that DCE is more suitable for this transformation than dichloromethane (DCM),  $\text{CHCl}_3$ ,  $\text{MeOH}$ , toluene, and  $\text{MeCN}$  (entries 6, 13–17). However, **3aa** was obtained in 0–55% yields when other catalysts including  $[(p\text{-cymene})\text{RuCl}_2]_2$ ,  $[\text{Cp}^*\text{IrCl}_2]_2$ , and  $\text{Cp}^*\text{Co}(\text{CO})\text{I}_2$  were employed (entries 18–20). In addition, adjusting the amounts of  $\text{HOAc}$  and  $\text{H}_2\text{O}$  did not promote the occurrence of this conversion (entries 21–24). When no additional  $\text{H}_2\text{O}$  was added, only 13% yield of product **3aa** was given (entry 25). Therefore, the factors in entry 6 were selected as the standard reaction conditions.

**(b) Table S2. Optimization Studies Catalyzed by  $[(p\text{-cymene})\text{RuCl}_2]_2$**

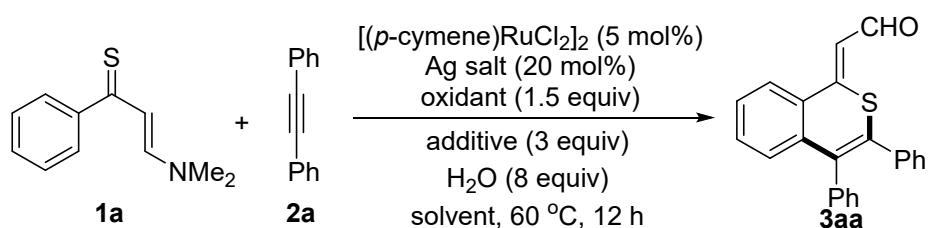

| entry    | Ag salt                  | oxidant          | additive      | solvent    | yield <sup>b</sup> (%) |
|----------|--------------------------|------------------|---------------|------------|------------------------|
| <b>1</b> | <b>AgSbF<sub>6</sub></b> | <b>AgOAc</b>     | <b>HOAc</b>   | <b>DCE</b> | <b>55</b>              |
| 2        | $\text{AgBF}_4$          | $\text{AgOAc}$   | $\text{HOAc}$ | DCE        | 32                     |
| 3        | $\text{AgOTf}$           | $\text{AgOAc}$   | $\text{HOAc}$ | DCE        | 50                     |
| 4        | $\text{AgNTf}_2$         | $\text{AgOAc}$   | $\text{HOAc}$ | DCE        | 25                     |
| 5        | -                        | $\text{AgOAc}_2$ | $\text{HOAc}$ | DCE        | 0                      |

|    |                    |                      |                       |                   |                 |
|----|--------------------|----------------------|-----------------------|-------------------|-----------------|
| 6  | AgSbF <sub>6</sub> | Cu(OAc) <sub>2</sub> | HOAc                  | DCE               | 42              |
| 7  | AgSbF <sub>6</sub> | AgCO <sub>3</sub>    | HOAc                  | DCE               | 51              |
| 8  | AgSbF <sub>6</sub> | Ag <sub>2</sub> O    | HOAc                  | DCE               | 20              |
| 9  | AgSbF <sub>6</sub> | AgOAc                | TFA                   | DCE               | 0               |
| 10 | AgSbF <sub>6</sub> | AgOAc                | PivOH                 | DCE               | 48              |
| 11 | AgSbF <sub>6</sub> | AgOAc                | MesCO <sub>2</sub> H  | DCE               | 35              |
| 12 | AgSbF <sub>6</sub> | AgOAc                | 1-AdCO <sub>2</sub> H | DCE               | 52              |
| 13 | AgSbF <sub>6</sub> | AgOAc                | HOAc                  | DCM               | 33              |
| 14 | AgSbF <sub>6</sub> | AgOAc                | HOAc                  | CHCl <sub>3</sub> | 30              |
| 15 | AgSbF <sub>6</sub> | AgOAc                | HOAc                  | MeOH              | 25              |
| 16 | AgSbF <sub>6</sub> | AgOAc                | HOAc                  | toluene           | 22              |
| 17 | AgSbF <sub>6</sub> | AgOAc                | HOAc                  | MeCN              | 9               |
| 18 | AgSbF <sub>6</sub> | AgOAc                | HOAc                  | DCE               | 42 <sup>c</sup> |
| 19 | AgSbF <sub>6</sub> | AgOAc                | HOAc                  | DCE               | 53 <sup>d</sup> |
| 20 | AgSbF <sub>6</sub> | AgOAc                | HOAc                  | DCE               | 46 <sup>e</sup> |
| 21 | AgSbF <sub>6</sub> | AgOAc                | HOAc                  | DCE               | 55 <sup>f</sup> |
| 22 | AgSbF <sub>6</sub> | AgOAc                | HOAc                  | DCE               | 0 <sup>g</sup>  |

<sup>a</sup> Reaction conditions: **1a** (0.2 mmol), **2a** (0.3 mmol), [(*p*-cymene)RuCl<sub>2</sub>]<sub>2</sub> (5 mol%), Ag salt (20 mol%), oxidant (1.5 equiv), additive (3 equiv), H<sub>2</sub>O (8 equiv), solvent (1.5 mL), 60 °C, 12 h, under N<sub>2</sub>. <sup>b</sup> Isolated yields. <sup>c</sup> HOAc (2 equiv). <sup>d</sup> HOAc (4 equiv). <sup>e</sup> H<sub>2</sub>O (6 equiv). <sup>f</sup> H<sub>2</sub>O (10 equiv). <sup>g</sup> without H<sub>2</sub>O.

Optimization studies on the synthesis of 1*H*-isothiochromenes catalyzed by [(*p*-cymene)RuCl<sub>2</sub>]<sub>2</sub> were carried out, and the results are summarized in Table S2. Initially, (*E*)-3-(dimethylamino)-1-phenylprop-2-ene-1-thione (**1a**) (0.2 mmol, 1.0 equiv) was introduced to react with 1,2-diphenylethyne (**2a**) (0.3 mmol, 1.5 equiv) accompanied by [(*p*-cymene)RuCl<sub>2</sub>]<sub>2</sub> (5 mol%) AgSbF<sub>6</sub> (20 mol%), AgOAc (1.5 equiv), HOAc (3 equiv), and H<sub>2</sub>O (8 equiv) in 1,2-dichloroethane (DCE) at 60 °C under nitrogen atmosphere for 12 h. The target product (*Z*)-2-(3,4-diphenyl-1*H*-isothiochromen-1-ylidene)acetaldehyde (**3aa**) was achieved with a yield of 55% (Table S2, entry 1). Then, a series of optimization studies on Ag salts, oxidants, additives, solvents as well

as the amount of HOAc and H<sub>2</sub>O were carried out sequentially. However, these attempted reaction conditions did not provide product **3aa** with a yield higher than 55%. Therefore, the factors in entry 1 are currently the optimal conditions for synthesizing 1*H*-isothiochromenes catalyzed by [(*p*-cymene)RuCl<sub>2</sub>]<sub>2</sub>.

### 3. Synthetic Procedures

#### (a) General Procedure for the Preparation of **1**

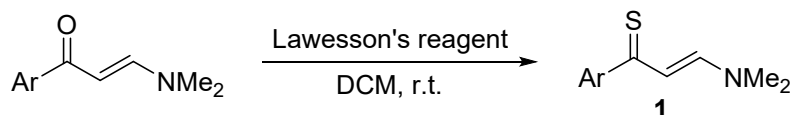

Enaminothiones (**1**) was prepared according to the previous work of Jiang.<sup>2</sup> To a stirred solution of Lawesson's reagent (2 mmol, 1.0 equiv) in DCM (20 mL), the enaminone (2 mmol, 1.0 equiv) was added. The reaction mixture was stirred at room temperature for 1 h. Then, the mixture was concentrated in vacuo and the resulting residue was purified by column chromatography on silica gel with EtOAc/petroleum ether.

#### (b) General Procedure for the Rh(III)-Catalyzed Preparation of **3**

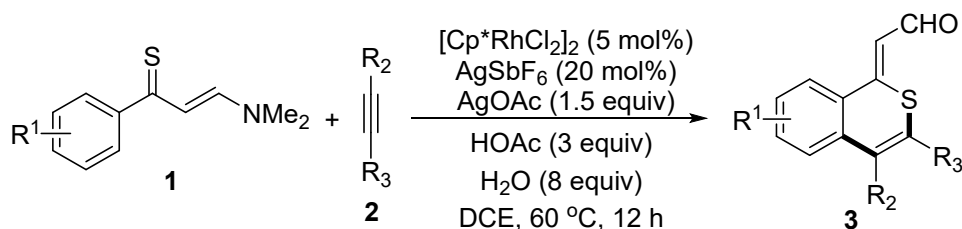

A mixture of substituted enaminothiones (**1**) (0.2 mmol, 1.0 equiv), alkynes (**2**) (0.3 mmol, 1.5 equiv), [(Cp\*RhCl<sub>2</sub>)<sub>2</sub>] (0.01 mmol, 5 mol%), AgSbF<sub>6</sub> (0.04 mmol, 20 mol%), and AgOAc (0.3 mmol, 1.5 equiv) were weighed in a Schlenk tube equipped with a stir bar. Dry DCE (1.5 mL), HOAc (3 equiv), and H<sub>2</sub>O (1.6 mmol, 8 equiv) were added and the mixture was stirred at 60 °C in a pre-heated oil bath for 12 h under N<sub>2</sub> atmosphere. Then, the mixture was cooled to room temperature and concentrated in vacuo and the resulting residue was purified by column chromatography on silica gel with EtOAc/petroleum ether.

#### (c) Gram-Scale Preparation of **3aa**

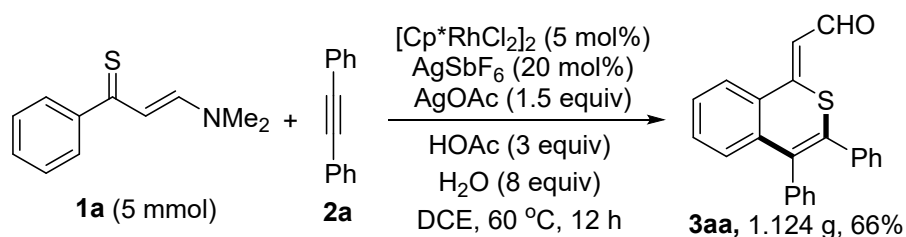

A mixture of (*E*)-3-(dimethylamino)-1-phenylprop-2-ene-1-thione (**1a**) (955.4 mg, 5.0 mmol, 1.0 equiv), 1,2-diphenylethyne (**2a**) (1335.6 mg, 7.5 mmol, 1.5 equiv), [(Cp\**RhCl*<sub>2</sub>)<sub>2</sub>] (0.01 mmol, 5 mol%), AgSbF<sub>6</sub> (0.04 mmol, 20 mol%), and AgOAc (0.3 mmol, 1.5 equiv) were weighted in a Schlenk tube equipped with a stir bar. Dry DCE (1.5 mL), HOAc (3 equiv), and H<sub>2</sub>O (1.6 mmol, 8 equiv) were added and the mixture was stirred at 60 °C in a pre-heated oil bath for 12 h under N<sub>2</sub> atmosphere. Then, the mixture was cooled to room temperature and concentrated in vacuo and the resulting residue was purified by flash column chromatography on silica gel with EtOAc/petroleum ether, the product **3aa** was afforded as a yellow solid in 66% yield (1.124 g, 3.3 mmol).

#### (d) Condensation Reaction of **3aa** for the Preparation of **5**

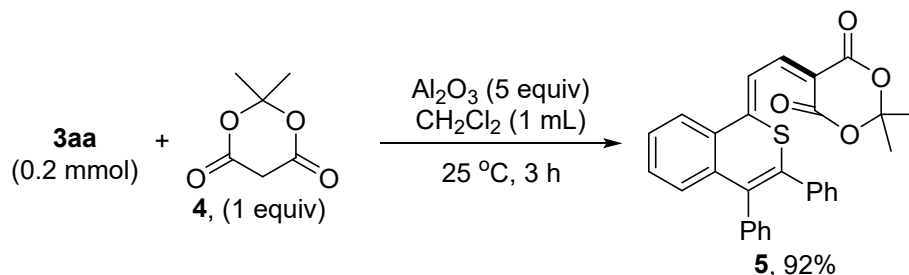

A mixture of (*Z*)-2-(3,4-diphenyl-1*H*-isothiochromen-1-ylidene)acetaldehyde (**3aa**) (0.2 mmol, 1.0 equiv), 2,2-dimethyl-1,3-dioxane-4,6-dione (**4**) (0.2 mmol, 1 equiv), and Al<sub>2</sub>O<sub>3</sub> (1 mmol, 5 equiv) were weighted in a Schlenk tube equipped with a stir bar. Dry DCM (1 mL) was added and the mixture was stirred at 25 °C for 3 h. Afterwards, it was diluted with CH<sub>2</sub>Cl<sub>2</sub> and transferred to a round bottom flask. Silica was added to the flask and volatiles were evaporated under reduced pressure. The residue was purified by flash column chromatography on silica gel with EtOAc/petroleum ether to give olefination product **5** in 92% yield.

#### (e) Condensation Reaction of **3aa** for the Preparation of **7**



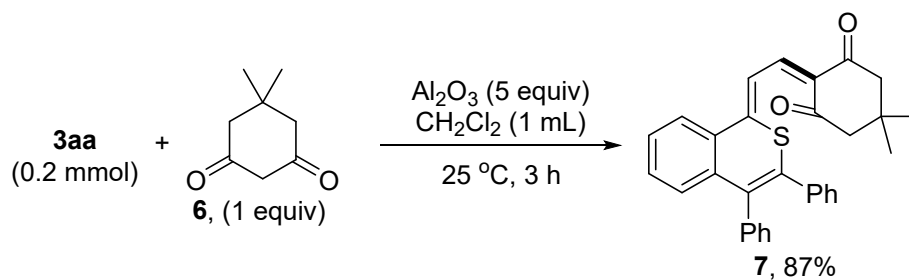

A mixture of (*Z*)-2-(3,4-diphenyl-1*H*-isothiochromen-1-ylidene)acetaldehyde (**3aa**) (0.2 mmol, 1.0 equiv), 5,5-dimethylcyclohexane-1,3-dione (**6**) (0.2 mmol, 1 equiv), and Al<sub>2</sub>O<sub>3</sub> (1 mmol, 5 equiv) were weighted in a Schlenk tube equipped with a stir bar. Dry DCM (1 mL) was added and the mixture was stirred at 25 °C for 3 h. Afterwards, it was diluted with CH<sub>2</sub>Cl<sub>2</sub> and transferred to a round bottom flask. Silica was added to the flask and volatiles were evaporated under reduced pressure. The residue was purified by flash column chromatography on silica gel with EtOAc/petroleum ether to give olefination product **7** in 87% yield.

**(f) Condensation Reaction of 3aa for the Preparation of 9**

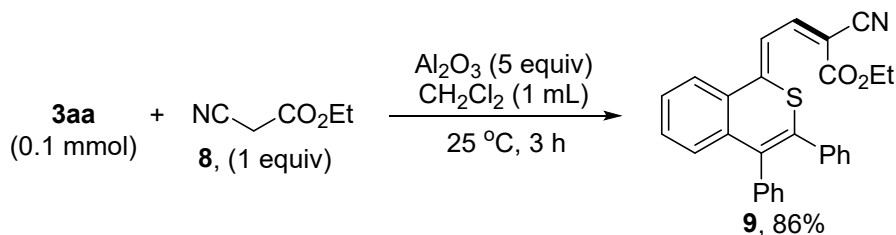

A mixture of (*Z*)-2-(3,4-diphenyl-1*H*-isothiochromen-1-ylidene)acetaldehyde (**3aa**) (0.2 mmol, 1.0 equiv), ethyl 2-cyanoacetate (**8**) (0.2 mmol, 1 equiv), and Al<sub>2</sub>O<sub>3</sub> (1 mmol, 5 equiv) were weighted in a Schlenk tube equipped with a stir bar. Dry DCM (1 mL) was added and the mixture was stirred at 25 °C for 3 h. Afterwards, it was diluted with CH<sub>2</sub>Cl<sub>2</sub> and transferred to a round bottom flask. Silica was added to the flask and volatiles were evaporated under reduced pressure. The residue was purified by flash column chromatography on silica gel with EtOAc/petroleum ether to give olefination product **9** in 86% yield.

**(g) Condensation Reaction of 3aa for the Preparation of 11**

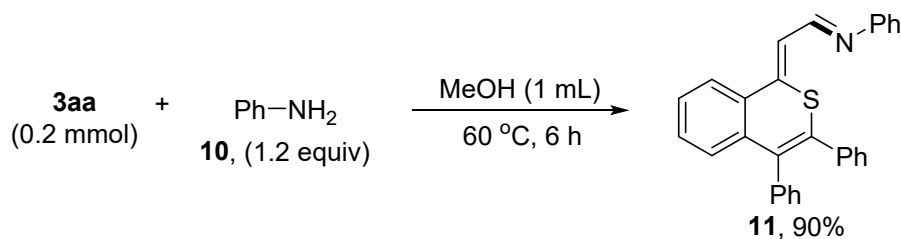

A mixture of (*Z*)-2-(3,4-diphenyl-1*H*-isothiochromen-1-ylidene)acetaldehyde (**3aa**) (0.2 mmol, 1.0 equiv), and aniline (**10**) (0.24 mmol, 1.2 equiv) were weighted in a Schlenk tube equipped with a stir bar. Dry MeOH (1 mL) was added and the mixture was stirred at 60 °C for 6 h. Afterwards, it was diluted with CH<sub>2</sub>Cl<sub>2</sub> and transferred to a round bottom flask. Silica was added to the flask and volatiles were evaporated under reduced pressure. The residue was purified by flash column chromatography on silica gel with EtOAc/petroleum ether to give olefination product **11** in 90% yield.

#### 4. Characterization of **3**, **5**, **7**, **9**, and **11**

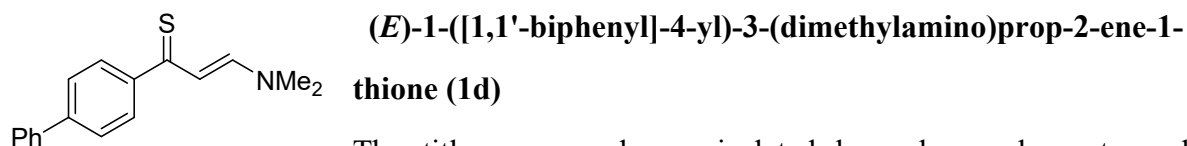

The title compound was isolated by column chromatography (eluent: EtOAc/petroleum ether = 1/50) as a red solid in 84% yield (448.7 mg, 1.68 mmol). Mp: 96 – 97 °C. <sup>1</sup>H NMR (DMSO-*d*<sub>6</sub>, 500 MHz): δ 8.38 (d, *J* = 11.0 Hz, 1H), 7.98 (d, *J* = 7.3 Hz, 2H), 7.71–7.65 (m, 4H), 7.47 (t, *J* = 7.6 Hz, 2H), 7.38 (t, *J* = 7.3 Hz, 1H), 6.73 (d, *J* = 11.1 Hz, 1H), 3.30 (s, 3H), 3.08 (s, 3H). <sup>13</sup>C NMR (DMSO-*d*<sub>6</sub>, 125 MHz): δ 208.7, 158.2, 146.1, 141.3, 139.4, 128.9, 127.7, 127.7, 126.6, 125.8, 110.3, 45.9, 38.4. HRMS (ESI): Calcd for C<sub>17</sub>H<sub>17</sub>NNaS [M+Na]<sup>+</sup> 290.0974, found: 290.0976.

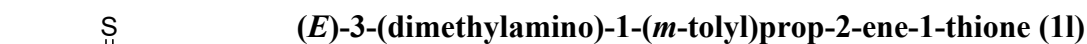

The title compound was isolated by column chromatography (eluent: EtOAc/petroleum ether = 1/50) as a red solid in 86% yield (352.8 mg, 1.72 mmol). Mp: 73 – 74 °C. <sup>1</sup>H NMR (DMSO-*d*<sub>6</sub>, 500 MHz): δ 8.33 (d, *J* = 10.9 Hz, 1H), 7.66 – 7.62 (m, 2H), 7.27 – 7.19 (m, 2H), 6.64 (d, *J* = 11.2 Hz, 1H), 3.29 (s, 3H), 3.06 (s, 3H), 2.34 (s, 3H). <sup>13</sup>C NMR (DMSO-*d*<sub>6</sub>, 125 MHz): δ 210.1, 158.0, 147.5,

136.6, 130.2, 127.5, 127.4, 124.1, 110.4, 45.8, 38.4, 21.0. **HRMS (ESI):** Calcd for  $C_{12}H_{15}NNaS$   $[M+Na]^+$  228.0817, found: 228.0819.

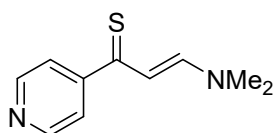

**(E)-3-(dimethylamino)-1-(pyridin-4-yl)prop-2-ene-1-thione (1p)**

The title compound was isolated by column chromatography (eluent: EtOAc/petroleum ether = 1/50) as a red solid in 73% yield (280.4 mg, 1.46 mmol). Mp: 104 – 105 °C.  **$^1H$  NMR (CDCl<sub>3</sub>, 500 MHz):**  $\delta$  8.49 – 8.49 (m, 2H), 8.33 (d,  $J$  = 11.2 Hz, 1H), 7.51 – 7.51 (m, 2H), 6.43 (d,  $J$  = 11.3 Hz, 1H), 3.23 (s, 3H), 2.98 (s, 3H).  **$^{13}C$  NMR (CDCl<sub>3</sub>, 125 MHz):**  $\delta$  210.5, 157.8, 154.3, 149.3, 120.4, 111.1, 46.2, 38.4. **HRMS (ESI):** Calcd for  $C_{10}H_{12}N_2NaS$   $[M+Na]^+$  215.0613, found: 215.0612.

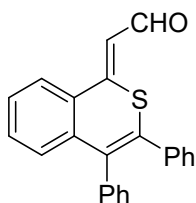

**(Z)-2-(3,4-diphenyl-1H-isothiochromen-1-ylidene)acetaldehyde (3aa)**

The title compound was isolated by column chromatography (eluent: EtOAc/petroleum ether = 1/50) as a yellow solid in 82% yield (55.8 mg, 0.164 mmol). Mp: 148 – 149 °C.  **$^1H$  NMR (CDCl<sub>3</sub>, 500 MHz):**  $\delta$  9.98 (d,  $J$  = 3.9 Hz, 1H), 8.12 (d,  $J$  = 7.8 Hz, 1H), 7.55 – 7.47 (m, 2H), 7.32 – 7.28 (m, 4H), 7.24 – 7.19 (m, 5H), 7.15 (d,  $J$  = 6.4 Hz, 2H), 6.98 (d,  $J$  = 4.0 Hz, 1H).  **$^{13}C$  NMR (CDCl<sub>3</sub>, 125 MHz):**  $\delta$  186.4, 153.8, 137.4, 137.1, 135.4, 134.1, 132.5, 131.5, 131.1, 129.7, 129.3, 128.5, 128.2, 128.1, 128.0, 127.3, 126.1, 124.4, 113.3. **HRMS (ESI):** Calcd for  $C_{23}H_{16}NaOS$   $[M+Na]^+$  363.0814, found: 363.0812.

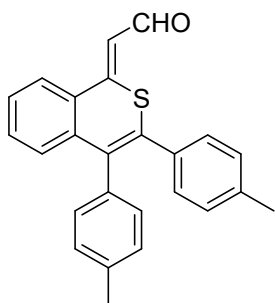

**(Z)-2-(3,4-di-p-tolyl-1H-isothiochromen-1-ylidene)acetaldehyde (3ab)**

The title compound was isolated by column chromatography (eluent: EtOAc/petroleum ether = 1/50) as a yellow solid in 83% yield (61.1 mg, 0.166 mmol). Mp: 102 – 103 °C.  **$^1H$  NMR (CDCl<sub>3</sub>, 500 MHz):**  $\delta$  9.92 (d,  $J$  = 4.1 Hz, 1H), 8.03 (d,  $J$  = 7.6 Hz, 1H), 7.46 – 7.38 (m, 2H), 7.21 (d,  $J$  = 7.7 Hz, 1H), 7.09 – 7.01 (m, 4H), 7.01 – 6.93 (m, 4H), 6.88 (d,  $J$  = 4.2 Hz, 1H), 2.32 (s, 3H), 2.26 (s, 3H).  **$^{13}C$  NMR (CDCl<sub>3</sub>, 125 MHz):**  $\delta$  186.4, 154.3, 137.9, 136.8, 135.8,

134.4, 134.2, 133.9, 132.2, 131.4, 130.9, 129.6, 129.2, 128.9, 128.8, 128.3, 126.1, 124.3, 113.3, 21.2. **HRMS (ESI):** Calcd for C<sub>25</sub>H<sub>20</sub>NaOS [M+Na]<sup>+</sup> 391.1127, found: 391.1129.

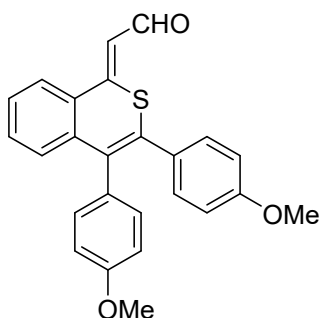

**(Z)-2-(3,4-bis(4-methoxyphenyl)-1H-isothiochromen-1-ylidene)acetaldehyde (3ac)**

The title compound was isolated by column chromatography (eluent: EtOAc/petroleum ether = 1/50) as a yellow solid in 77% yield (61.6 mg, 0.154 mmol). Mp: 90 – 91 °C. **<sup>1</sup>H NMR (CDCl<sub>3</sub>, 500 MHz):** δ 9.92 (d, *J* = 4.1 Hz, 1H), 8.03 (d, *J* = 9.5 Hz, 1H), 7.46 – 7.40 (m, 2H), 7.25 – 7.23 (m, 1H), 7.08 (d, *J* = 8.8 Hz, 2H), 6.99 (d, *J* = 8.7 Hz, 2H), 6.88 (d, *J* = 4.2 Hz, 1H), 6.80 (d, *J* = 8.7 Hz, 2H), 6.71 (d, *J* = 8.8 Hz, 2H), 3.79 (s, 3H), 3.75 (s, 3H). **<sup>13</sup>C NMR (CDCl<sub>3</sub>, 125 MHz):** δ 186.4, 159.2, 158.6, 154.3, 135.9, 133.9, 132.7, 132.2, 132.0, 131.4, 131.1, 129.7, 129.2, 128.3, 126.1, 124.3, 113.7, 113.6, 113.3, 55.2, 55.2. **HRMS (ESI):** Calcd for C<sub>25</sub>H<sub>20</sub>NaO<sub>3</sub>S [M+Na]<sup>+</sup> 423.1025, found: 423.1029.

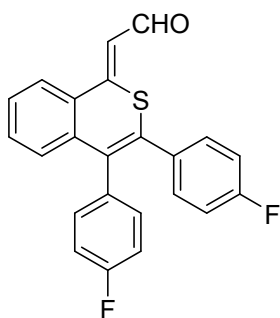

**(Z)-2-(3,4-bis(4-fluorophenyl)-1H-isothiochromen-1-ylidene)acetaldehyde (3ad)**

The title compound was isolated by column chromatography (eluent: EtOAc/petroleum ether = 1/50) as a yellow solid in 71% yield (53.4 mg, 0.142 mmol). Mp: 94 – 95 °C. **<sup>1</sup>H NMR (CDCl<sub>3</sub>, 500 MHz):** δ 9.89 (d, *J* = 3.6 Hz, 1H), 8.06 (d, *J* = 7.7 Hz, 1H), 7.51 – 7.43 (m, 2H), 7.17 (d, *J* = 7.7 Hz, 1H), 7.13 – 7.08 (m, 2H), 7.05 – 7.03 (m, 2H), 6.98 – 6.94 (m, 3H), 6.88 (t, *J* = 8.6 Hz, 2H). **<sup>13</sup>C NMR (CDCl<sub>3</sub>, 125 MHz):** δ 186.3, 162.3 (d, *J* = 248.9 Hz), 161.9 (d, *J* = 247.7 Hz), 153.0, 135.1, 133.7, 133.1 (d, *J* = 3.7 Hz), 132.9 (d, *J* = 3.5 Hz), 132.6 (d, *J* = 8.0 Hz), 131.8, 131.6 (d, *J* = 8.1 Hz), 131.6, 129.0, 128.7, 126.0, 124.5, 115.4 (d, *J* = 21.6 Hz), 115.3 (d, *J* = 21.7 Hz), 113.2. **<sup>19</sup>F NMR (CDCl<sub>3</sub>, 471 MHz):** δ -112.4, -114.0. **HRMS (ESI):** Calcd for C<sub>23</sub>H<sub>14</sub>F<sub>2</sub>NaOS [M+Na]<sup>+</sup> 399.0626, found: 399.0629.

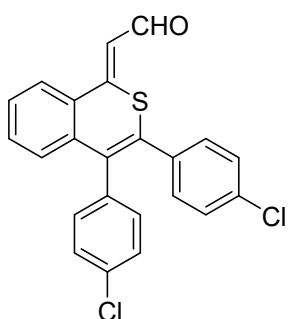

**(Z)-2-(3,4-bis(4-chlorophenyl)-1H-isothiochromen-1-ylidene)acetaldehyde (3ae)**

The title compound was isolated by column chromatography (eluent: EtOAc/petroleum ether = 1/50) as a yellow solid in 74% yield (60.4 mg, 0.148 mmol). Mp: 97 – 98 °C. **<sup>1</sup>H NMR (CDCl<sub>3</sub>, 500 MHz):** δ 9.89 (d, *J* = 3.6 Hz, 1H), 8.06 (d, *J* = 7.9 Hz, 1H), 7.50 – 7.43 (m, 2H), 7.27 – 7.25 (m, 2H), 7.18 (d, *J* = 8.5 Hz, 2H), 7.14 (d, *J* = 7.9 Hz, 1H), 7.07 (d, *J* = 8.5 Hz, 2H), 7.01 (d, *J* = 8.4 Hz, 2H), 6.94 (d, *J* = 3.6 Hz, 1H). **<sup>13</sup>C NMR (CDCl<sub>3</sub>, 125 MHz):** δ 186.4, 152.7, 135.6, 135.3, 134.9, 134.5, 133.6, 133.4, 132.3, 131.6, 131.6, 131.0, 129.0, 128.9, 128.7, 128.6, 126.1, 124.6, 113.5. **HRMS (ESI):** Calcd for C<sub>23</sub>H<sub>14</sub>Cl<sub>2</sub>NaOS [M+Na]<sup>+</sup> 431.0035, found: 431.0032.

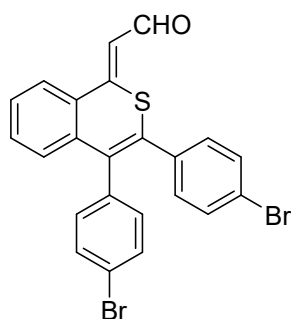

**(Z)-2-(3,4-bis(4-bromophenyl)-1H-isothiochromen-1-ylidene)acetaldehyde (3af)**

The title compound was isolated by column chromatography (eluent: EtOAc/petroleum ether = 1/50) as a yellow solid in 72% yield (71.4 mg, 0.144 mmol). Mp: 118 – 119 °C. **<sup>1</sup>H NMR (CDCl<sub>3</sub>, 500 MHz):** δ 9.88 (d, *J* = 3.5 Hz, 1H), 8.05 (d, *J* = 7.5 Hz, 1H), 7.50 – 7.40 (m, 4H), 7.34 (d, *J* = 8.4 Hz, 2H), 7.13 (d, *J* = 7.9 Hz, 1H), 7.01 (d, *J* = 8.4 Hz, 2H), 6.96 – 6.93 (m, 3H). **<sup>13</sup>C NMR (CDCl<sub>3</sub>, 125 MHz):** δ 186.3, 152.6, 136.1, 135.7, 134.8, 133.4, 132.6, 131.7, 131.6, 131.5, 131.5, 131.2, 129.0, 128.9, 126.1, 124.6, 122.7, 121.8, 113.6. **HRMS (ESI):** Calcd for C<sub>23</sub>H<sub>14</sub>Br<sub>2</sub>NaOS [M+Na]<sup>+</sup> 520.9004 and 518.9024, found: 520.9002 and 518.9023.

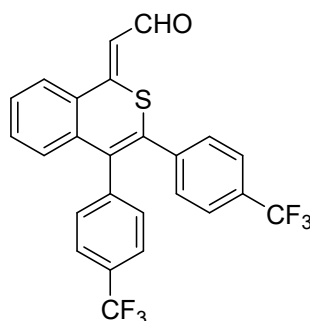

**(Z)-2-(3,4-bis(4-(trifluoromethyl)phenyl)-1H-isothiochromen-1-ylidene)acetaldehyde (3ag)**

The title compound was isolated by column chromatography (eluent: EtOAc/petroleum ether = 1/50) as a yellow solid in 67% yield (63.8 mg, 0.134 mmol). Mp: 120 – 121 °C. **<sup>1</sup>H NMR (CDCl<sub>3</sub>, 500 MHz):** δ 9.89 (d, *J* = 3.3 Hz, 1H), 8.08 (d, *J* = 7.9 Hz, 1H), 7.56 – 7.45 (m, 6H), 7.28 – 7.23 (m, 4H), 7.07 (d, *J* = 8.0 Hz, 1H), 6.99 (d, *J* = 3.4 Hz, 1H). **<sup>13</sup>C NMR (CDCl<sub>3</sub>, 125 MHz):** δ 186.4, 152.0, 140.9, 140.3, 134.4, 133.5, 131.7, 131.7, 131.4, 130.5 (q, *J* = 32.8 Hz), 129.9 (q, *J* = 33.2 Hz), 129.3, 129.0, 126.1, 125.4 (q, *J* = 3.7 Hz),

125.3 (q,  $J = 3.9$  Hz), 124.9, 124.7, 122.7, 122.6, 113.8.  $^{19}\text{F}$  NMR ( $\text{CDCl}_3$ , 471 MHz):  $\delta$  -62.7, -62.9. HRMS (ESI): Calcd for  $\text{C}_{25}\text{H}_{14}\text{F}_6\text{NaOS}$   $[\text{M}+\text{Na}]^+$  499.0562, found: 499.0560.

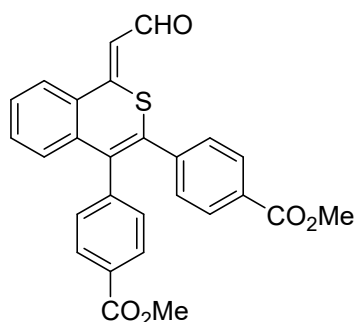

**dimethyl 4,4'-(1-(2-oxoethylidene)-1*H*-isothiochromene-3,4-diyl)(*Z*)-dibenzoate (3ah)**

The title compound was isolated by column chromatography (eluent: EtOAc/petroleum ether = 1/50) as a yellow solid in 70% yield (63.9 mg, 0.140 mmol). Mp: 102 – 103 °C.  $^1\text{H}$  NMR ( $\text{CDCl}_3$ , 500 MHz):  $\delta$  9.89 (d,  $J = 3.5$  Hz, 1H), 8.07 (d,  $J = 8.0$  Hz, 1H), 7.92 (d,  $J = 8.2$  Hz, 2H), 7.83 (d,  $J = 8.3$  Hz, 2H), 7.50 (t,  $J = 7.7$  Hz, 1H), 7.44 (t,  $J = 7.6$  Hz, 1H), 7.21 (d,  $J = 8.3$  Hz, 2H), 7.17 (d,  $J = 8.2$  Hz, 2H), 7.10 (d,  $J = 8.1$  Hz, 1H), 6.97 (d,  $J = 3.6$  Hz, 1H), 3.89 (s, 3H), 3.87 (s, 3H).  $^{13}\text{C}$  NMR ( $\text{CDCl}_3$ , 125 MHz):  $\delta$  186.4, 166.5, 166.3, 152.4, 142.1, 141.3, 134.5, 133.6, 132.0, 131.6, 131.1, 129.9, 129.8, 129.6, 129.5, 129.4, 129.1, 129.0, 126.1, 124.6, 113.6, 52.2. HRMS (ESI): Calcd for  $\text{C}_{27}\text{H}_{20}\text{NaO}_5\text{S}$   $[\text{M}+\text{Na}]^+$  479.0924, found: 479.0928.

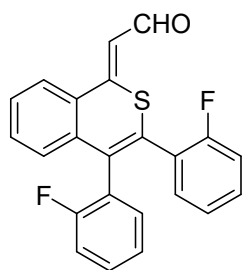

**(*Z*)-2-(3,4-bis(2-fluorophenyl)-1*H*-isothiochromen-1-ylidene)acetaldehyde (3ai)**

The title compound was isolated by column chromatography (eluent: EtOAc/petroleum ether = 1/50) as a yellow solid in 47% yield (35.4 mg, 0.094 mmol). Mp: 150 – 151 °C.  $^1\text{H}$  NMR ( $\text{CDCl}_3$ , 500 MHz):  $\delta$  9.88 (d,  $J = 3.4$  Hz, 1H), 8.09 (d,  $J = 8.0$  Hz, 1H), 7.53 – 7.44 (m, 2H), 7.25 – 7.18 (m, 3H), 7.12 (d,  $J = 7.5$  Hz, 2H), 7.02 – 6.98 (m, 4H), 6.89 (t,  $J = 8.9$  Hz, 1H).  $^{13}\text{C}$  NMR ( $\text{CDCl}_3$ , 125 MHz):  $\delta$  186.3, 159.3 (d,  $J = 249.0$  Hz), 152.9, 134.2, 132.1 (d,  $J = 9.3$  Hz), 132.0 (d,  $J = 9.9$  Hz), 131.7, 131.3, 130.9 (d,  $J = 8.0$  Hz), 130.0 (d,  $J = 8.0$  Hz), 129.9, 129.0, 128.4, 126.1, 124.7 (d,  $J = 16.7$  Hz), 124.6, 124.3 (d,  $J = 15.7$  Hz), 123.9, 115.5 (d,  $J = 21.1$  Hz), 115.4 (d,  $J = 20.2$  Hz), 113.2.  $^{19}\text{F}$  NMR ( $\text{CDCl}_3$ , 471 MHz):  $\delta$  -112.5, -113.3. HRMS (ESI): Calcd for  $\text{C}_{23}\text{H}_{14}\text{F}_2\text{NaOS}$   $[\text{M}+\text{Na}]^+$  399.0626, found: 399.0624.

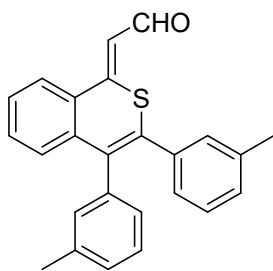

**(Z)-2-(3,4-di-*m*-tolyl-1*H*-isothiochromen-1-ylidene)acetaldehyde**

**(3aj)**

The title compound was isolated by column chromatography (eluent: EtOAc/petroleum ether = 1/50) as a yellow solid in 79% yield (58.2 mg, 0.158 mmol). Mp: 130 – 131 °C. <sup>1</sup>H NMR (CDCl<sub>3</sub>, 500 MHz): δ 9.92 (d, *J* = 4.0 Hz, 1H), 8.04 (d, *J* = 7.4 Hz, 1H), 7.48 – 7.41 (m, 2H), 7.22 (d, *J* = 7.5 Hz, 1H), 7.13 (t, *J* = 7.6 Hz, 1H), 7.05 – 6.87 (m, 8H), 2.26 (s, 3H), 2.22 (s, 3H). <sup>13</sup>C NMR (CDCl<sub>3</sub>, 125 MHz): δ 186.3, 154.0, 137.7, 137.6, 137.3, 136.9, 135.6, 134.0, 132.4, 131.7, 131.4, 130.3, 129.3, 128.8, 128.4, 128.1, 128.0, 127.9, 127.8, 126.8, 126.0, 124.3, 113.2, 21.3, 21.2. HRMS (ESI): Calcd for C<sub>25</sub>H<sub>20</sub>NaOS [M+Na]<sup>+</sup> 391.1127, found: 391.1122.

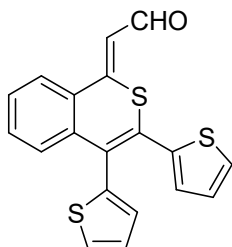

**(Z)-2-(3,4-di(thiophen-2-yl)-1*H*-isothiochromen-1-ylidene)acetaldehyde (3ak)**

The title compound was isolated by column chromatography (eluent: EtOAc/petroleum ether = 1/50) as a vermeil solid in 72% yield (50.7 mg, 0.144 mmol). Mp: 155 – 156 °C. <sup>1</sup>H NMR (CDCl<sub>3</sub>, 500 MHz): δ 9.99 (d, *J* = 4.2 Hz, 1H), 7.98 (d, *J* = 7.2 Hz, 1H), 7.48 – 7.40 (m, 4H), 7.30 (d, *J* = 4.3 Hz, 2H), 7.12 (dd, *J* = 5.1, 3.5 Hz, 1H), 7.03 (d, *J* = 3.4 Hz, 1H), 6.96 – 6.92 (m, 1H), 6.89 (d, *J* = 4.2 Hz, 1H). <sup>13</sup>C NMR (CDCl<sub>3</sub>, 125 MHz): δ 186.8, 152.5, 138.2, 137.4, 135.7, 131.6, 130.8, 130.2, 129.5, 129.2, 129.1, 128.8, 127.8, 127.3, 126.5, 126.1, 124.4, 124.3, 114.8. HRMS (ESI): Calcd for C<sub>19</sub>H<sub>12</sub>NaOS<sub>3</sub> [M+Na]<sup>+</sup> 374.9942, found: 374.9945.

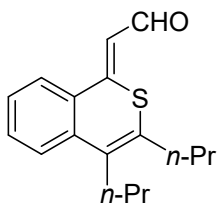

**(Z)-2-(3,4-dipropyl-1*H*-isothiochromen-1-ylidene)acetaldehyde (3al)**

The title compound was isolated by column chromatography (eluent: EtOAc/petroleum ether = 1/50) as a yellow solid in 81% yield (44.1 mg, 0.162 mmol). Mp: 55 – 56 °C. <sup>1</sup>H NMR (CDCl<sub>3</sub>, 500 MHz): δ 9.86 (d, *J* = 3.5 Hz, 1H), 7.96 (d, *J* = 8.2 Hz, 1H), 7.68 (d, *J* = 8.2 Hz, 1H), 7.57 (t, *J* = 7.7 Hz, 1H), 7.41 (t, *J* = 7.6 Hz, 1H), 6.78 (d, *J* = 4.1 Hz, 1H), 2.77 – 2.70 (m, 2H), 2.61 – 2.54 (m, 2H), 1.74 – 1.66 (m, 2H), 1.62 – 1.55 (m, 2H), 1.06 – 1.02 (m, 6H). <sup>13</sup>C NMR (CDCl<sub>3</sub>, 125 MHz): δ

186.3, 154.4, 134.7, 133.0, 131.5, 128.3, 127.5, 126.6, 125.7, 124.8, 113.4, 36.3, 30.9, 23.6, 23.0, 14.3, 14.0. **HRMS (ESI):** Calcd for C<sub>17</sub>H<sub>20</sub>NaOS [M+Na]<sup>+</sup> 295.1127, found: 295.1130.

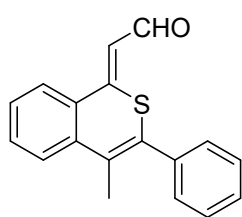

**(Z)-2-(4-methyl-3-phenyl-1H-isothiochromen-1-ylidene)acetaldehyde (3am)**

The title compound was isolated by column chromatography (eluent: EtOAc/petroleum ether = 1/10) as a yellow solid in 82% yield (45.6 mg, 0.164 mmol). Mp: 111 – 112 °C. **<sup>1</sup>H NMR (CDCl<sub>3</sub>, 500 MHz):** δ 9.90 (d, *J* = 4.1 Hz, 1H), 8.01 (d, *J* = 8.1 Hz, 1H), 7.79 (d, *J* = 8.0 Hz, 1H), 7.64 (t, *J* = 7.6 Hz, 1H), 7.50 (t, *J* = 7.6 Hz, 1H), 7.46 – 7.39 (m, 5H), 6.83 (d, *J* = 4.2 Hz, 1H), 2.24 (s, 3H). **<sup>13</sup>C NMR (CDCl<sub>3</sub>, 125 MHz):** δ 186.4, 153.8, 137.4, 135.5, 132.5, 131.7, 130.1, 128.8, 128.6, 128.3, 126.5, 126.2, 124.7, 113.6, 17.5. **HRMS (ESI):** Calcd for C<sub>18</sub>H<sub>14</sub>NaOS [M+Na]<sup>+</sup> 301.0658, found: 301.0654.

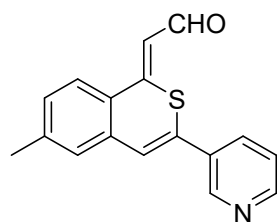

**(Z)-2-(6-methyl-3-(pyridin-3-yl)-1H-isothiochromen-1-ylidene)acetaldehyde (3bn)**

The title compound was isolated by column chromatography (eluent: EtOAc/petroleum ether = 1/10) as a yellow solid in 23% yield (12.8 mg, 0.046 mmol). Mp: 106 – 107 °C. **<sup>1</sup>H NMR (CDCl<sub>3</sub>, 500 MHz):** δ 9.87 (d, *J* = 3.0 Hz, 1H), 8.90 (s, 1H), 8.66 – 8.66 (m, 1H), 7.96 (d, *J* = 7.6 Hz, 1H), 7.90 (d, *J* = 8.3 Hz, 1H), 7.39 – 7.39 (m, 1H), 7.31 (d, *J* = 8.4 Hz, 1H), 7.28 (s, 1H), 7.17 (s, 1H), 6.93 (d, *J* = 3.1 Hz, 1H), 2.45 (s, 3H). **<sup>13</sup>C NMR (CDCl<sub>3</sub>, 125 MHz):** δ 186.1, 152.4, 150.2, 147.6, 142.7, 134.4, 134.0, 133.2, 132.8, 131.0, 130.8, 124.1, 123.6, 123.0, 122.0, 112.6, 21.3. **HRMS (ESI):** Calcd for C<sub>17</sub>H<sub>13</sub>NNaOS [M+Na]<sup>+</sup> 302.0610, found: 302.0613.

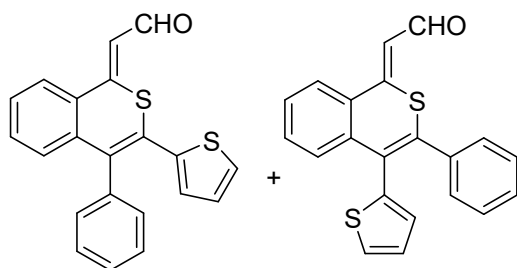

**(Z)-2-(4-phenyl-3-(thiophen-2-yl)-1H-isothiochromen-1-ylidene)acetaldehyde (3ao)**  
**and (Z)-2-(3-phenyl-4-(thiophen-2-yl)-1H-isothiochromen-1-ylidene)acetaldehyde (3ao')**  
**(3ao:3ao' = 1:1)**



The title compound was isolated by column chromatography (eluent: EtOAc/petroleum ether = 1/10) as a orange red solid in 68% yield (47.1 mg, 0.136 mmol). **<sup>1</sup>H NMR (CDCl<sub>3</sub>, 400 MHz):** δ 9.99 (d, *J* = 4.2 Hz, 1H), 9.91 (d, *J* = 3.9 Hz, 1H), 8.02 (t, *J* = 9.0 Hz, 2H), 7.50 – 7.40 (m, 9H), 7.25 – 7.14 (m, 10H), 6.93 – 6.90 (m, 3H), 6.87 (dd, *J* = 5.1, 3.7 Hz, 1H), 6.82 (d, *J* = 4.6 Hz, 1H). **<sup>13</sup>C NMR (CDCl<sub>3</sub>, 100 MHz):** δ 186.6, 186.5, 153.3, 152.9, 138.5, 137.6, 137.5, 137.4, 137.0, 135.6, 135.5, 132.3, 131.6, 131.4, 131.2, 129.8, 129.5, 129.3, 129.3, 128.9, 128.8, 128.7, 128.6, 128.5, 128.5, 128.2, 128.1, 126.7, 126.7, 126.4, 126.1, 126.0, 124.9, 124.3, 124.3, 114.3, 113.7. **HRMS (ESI):** Calcd for C<sub>21</sub>H<sub>14</sub>NaOS<sub>2</sub> [M+Na]<sup>+</sup> 369.0378, found: 369.0375.

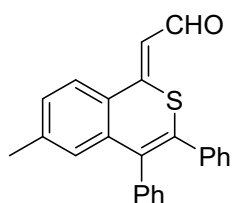

**(Z)-2-(6-methyl-3,4-diphenyl-1H-isothiochromen-1-ylidene)acetaldehyde (3ba)**

The title compound was isolated by column chromatography (eluent: EtOAc/petroleum ether = 1/50) as a yellow solid in 85% yield (60.2 mg, 0.170 mmol). Mp: 120 – 121 °C. **<sup>1</sup>H NMR (CDCl<sub>3</sub>, 500 MHz):** δ 9.92 (d, *J* = 3.9 Hz, 1H), 8.02 (d, *J* = 8.4 Hz, 1H), 7.35 – 7.27 (m, 4H), 7.19 – 7.19 (m, 5H), 7.12 (d, *J* = 6.5 Hz, 2H), 7.04 (s, 1H), 6.94 (d, *J* = 3.9 Hz, 1H), 2.33 (s, 3H). **<sup>13</sup>C NMR (CDCl<sub>3</sub>, 125 MHz):** δ 186.1, 154.0, 142.2, 137.4, 137.2, 135.4, 134.3, 132.4, 131.1, 129.8, 129.7, 129.4, 128.1, 128.0, 128.0, 127.2, 124.4, 123.7, 112.1, 21.6. **HRMS (ESI):** Calcd for C<sub>24</sub>H<sub>18</sub>NaOS [M+Na]<sup>+</sup> 377.0971, found: 377.0966.

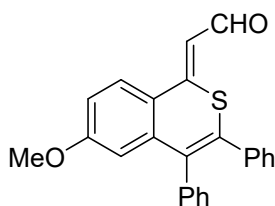

**(Z)-2-(6-methoxy-3,4-diphenyl-1H-isothiochromen-1-ylidene)acetaldehyde (3ca)**

The title compound was isolated by column chromatography (eluent: EtOAc/petroleum ether = 1/50) as a yellow solid in 81% yield (60.0 mg, 0.162 mmol). Mp: 130 – 131 °C. **<sup>1</sup>H NMR (CDCl<sub>3</sub>, 500 MHz):** δ 9.88 (d, *J* = 3.8 Hz, 1H), 8.10 (d, *J* = 9.1 Hz, 1H), 7.34 – 7.26 (m, 3H), 7.21 – 7.21 (m, 5H), 7.14 (d, *J* = 6.7 Hz, 2H), 7.08 (dd, *J* = 9.1, 2.6 Hz, 1H), 6.88 (d, *J* = 3.9 Hz, 1H), 6.72 (d, *J* = 2.6 Hz, 1H), 3.72 (s, 3H). **<sup>13</sup>C NMR (CDCl<sub>3</sub>, 125 MHz):** δ 185.7, 162.0, 153.8, 137.5, 137.3, 137.1, 135.2, 132.2,

131.0, 129.7, 128.2, 128.0, 127.9, 127.3, 126.5, 119.4, 115.6, 112.8, 110.7, 55.2. **HRMS (ESI):** Calcd for C<sub>24</sub>H<sub>18</sub>NaO<sub>2</sub>S [M+Na]<sup>+</sup> 393.0920, found: 393.0919.

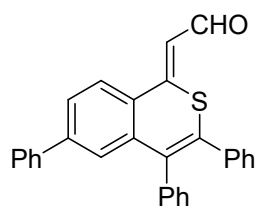

**(Z)-2-(3,4,6-triphenyl-1H-isothiochromen-1-ylidene)acetaldehyde**

**(3da)**

The title compound was isolated by column chromatography (eluent: EtOAc/petroleum ether = 1/50) as a yellow solid in 75% yield (62.4 mg, 0.150 mmol). Mp: 106 – 107 °C. **<sup>1</sup>H NMR (CDCl<sub>3</sub>, 500 MHz):** δ 9.90 (d, *J* = 3.7 Hz, 1H), 8.12 (d, *J* = 8.5 Hz, 1H), 7.69 (dd, *J* = 8.5, 1.7 Hz, 1H), 7.45 – 7.41 (m, 3H), 7.37 (t, *J* = 7.3 Hz, 2H), 7.33 (d, *J* = 7.0 Hz, 1H), 7.25 – 7.19 (m, 3H), 7.16 – 7.16 (m, 5H), 7.12 (d, *J* = 6.7 Hz, 2H), 6.94 (d, *J* = 3.8 Hz, 1H). **<sup>13</sup>C NMR (CDCl<sub>3</sub>, 125 MHz):** δ 186.2, 153.5, 143.9, 139.3, 137.2, 137.1, 135.9, 134.7, 132.5, 131.0, 129.7, 128.9, 128.2, 128.1, 128.0, 127.5, 127.4, 127.2, 127.0, 125.0, 125.0, 112.7. **HRMS (ESI):** Calcd for C<sub>29</sub>H<sub>20</sub>NaOS [M+Na]<sup>+</sup> 439.1127, found: 439.1129.

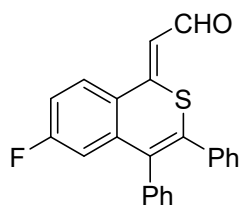

**(Z)-2-(6-fluoro-3,4-diphenyl-1H-isothiochromen-1-ylidene)acetaldehyde (3ea)**

The title compound was isolated by column chromatography (eluent: EtOAc/petroleum ether = 1/50) as a vermeil solid in 73% yield (52.3 mg, 0.146 mmol). Mp: 123 – 124 °C. **<sup>1</sup>H NMR (CDCl<sub>3</sub>, 500 MHz):** δ 9.92 (d, *J* = 3.8 Hz, 1H), 8.10 (dd, *J* = 9.1, 5.7 Hz, 1H), 7.33 – 7.27 (m, 3H), 7.23 – 7.16 (m, 6H), 7.12 – 7.10 (m, 2H), 6.94 – 6.87 (m, 2H). **<sup>13</sup>C NMR (CDCl<sub>3</sub>, 125 MHz):** δ 186.2, 164.4 (d, *J* = 252.5 Hz), 152.7, 138.2 (d, *J* = 8.9 Hz), 136.7 (d, *J* = 8.5 Hz), 136.0, 131.7 (d, *J* = 2.6 Hz), 130.9, 129.6, 128.4, 128.3, 128.1, 127.6, 127.1 (d, *J* = 9.1 Hz), 122.5 (d, *J* = 2.7 Hz), 116.4 (d, *J* = 22.7 Hz), 115.0 (d, *J* = 23.7 Hz), 112.9. **<sup>19</sup>F NMR (CDCl<sub>3</sub>, 471 MHz):** δ -106.9. **HRMS (ESI):** Calcd for C<sub>23</sub>H<sub>15</sub>FNaOS [M+Na]<sup>+</sup> 381.0720, found: 381.0716.

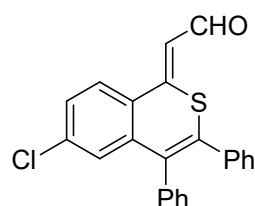

**(Z)-2-(6-chloro-3,4-diphenyl-1H-isothiochromen-1-ylidene)acetaldehyde (3fa)**

The title compound was isolated by column chromatography (eluent: EtOAc/petroleum ether = 1/50) as a yellow solid in 80% yield (59.8 mg, 0.160 mmol). Mp: 136 – 137 °C. **<sup>1</sup>H NMR (CDCl<sub>3</sub>, 500 MHz):** δ 9.92 (d, *J* = 3.7 Hz, 1H), 8.00 (d, *J* = 8.8 Hz, 1H), 7.44 (dd, *J* = 8.8, 2.2 Hz, 1H), 7.31 – 7.27 (m, 3H), 7.20 – 7.14 (m, 6H), 7.10 – 7.08 (m, 2H), 6.91 (d, *J* = 3.8 Hz, 1H) **<sup>13</sup>C NMR (CDCl<sub>3</sub>, 125 MHz):** δ 186.3, 152.5, 138.0, 137.0, 136.7, 136.6, 136.0, 131.5, 131.0, 129.6, 128.7, 128.6, 128.4, 128.3, 128.1, 127.6, 126.0, 124.6, 113.4. **HRMS (ESI):** Calcd for C<sub>23</sub>H<sub>15</sub>ClNaOS [M+Na]<sup>+</sup> 397.0424, found: 397.0422.

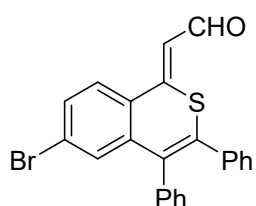

**(Z)-2-(6-bromo-3,4-diphenyl-1H-isothiochromen-1-ylidene)acetaldehyde (3ga)**

The title compound was isolated by column chromatography (eluent: EtOAc/petroleum ether = 1/50) as a yellow solid in 76% yield (63.5 mg, 0.152 mmol). Mp: 120 – 121 °C. **<sup>1</sup>H NMR (CDCl<sub>3</sub>, 500 MHz):** δ 9.92 (d, *J* = 3.6 Hz, 1H), 7.92 (d, *J* = 8.8 Hz, 1H), 7.59 (dd, *J* = 8.7, 1.9 Hz, 1H), 7.35 (d, *J* = 1.9 Hz, 1H), 7.31 – 7.28 (m, 3H), 7.21 – 7.14 (m, 5H), 7.09 (d, *J* = 7.5 Hz, 2H), 6.91 (d, *J* = 3.7 Hz, 1H). **<sup>13</sup>C NMR (CDCl<sub>3</sub>, 125 MHz):** δ 186.3, 152.5, 137.2, 136.7, 136.6, 136.0, 131.6, 131.6, 131.4, 131.0, 129.6, 128.4, 128.3, 128.1, 127.6, 126.5, 126.0, 124.9, 113.4. **HRMS (ESI):** Calcd for C<sub>25</sub>H<sub>15</sub>BrNaOS [M+Na]<sup>+</sup> 440.9919 and 442.9899, found: 440.9921 and 442.9896.

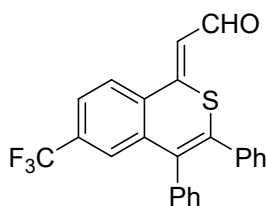

**(Z)-2-(3,4-diphenyl-6-(trifluoromethyl)-1H-isothiochromen-1-ylidene)acetaldehyde (3ha)**

The title compound was isolated by column chromatography (eluent: EtOAc/petroleum ether = 1/50) as a yellow solid in 71% yield (57.9 mg, 0.142 mmol). Mp: 113 – 114 °C. **<sup>1</sup>H NMR (CDCl<sub>3</sub>, 500 MHz):** δ 9.96 (d, *J* = 3.7 Hz, 1H), 8.14 (d, *J* = 8.5 Hz, 1H), 7.68 (d, *J* = 8.1 Hz, 1H), 7.46 (s, 1H), 7.31 – 7.27 (m, 3H), 7.21 – 7.15 (m, 5H), 7.09 (d, *J* = 7.5 Hz, 2H), 6.96 (d, *J* = 3.7 Hz, 1H). **<sup>13</sup>C NMR (CDCl<sub>3</sub>, 125 MHz):** δ 186.5, 151.7, 136.6, 136.3, 136.1, 135.9, 132.7, 131.9, 130.9, 129.6, 128.7, 128.5, 128.4, 128.2, 127.8, 125.8 (q, *J* = 4.3 Hz), 125.3, 124.7 (q, *J* = 3.4 Hz), 115.1. **<sup>19</sup>F NMR (CDCl<sub>3</sub>, 471 MHz):** δ -63.3. **HRMS (ESI):** Calcd for C<sub>24</sub>H<sub>15</sub>F<sub>3</sub>NaOS [M+Na]<sup>+</sup> 431.0688, found: 431.0686.

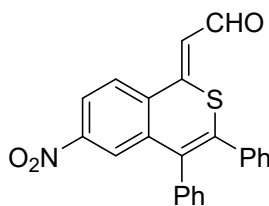

**(Z)-2-(6-nitro-3,4-diphenyl-1H-isothiochromen-1-ylidene)acetaldehyde (3ia)**

The title compound was isolated by column chromatography (eluent: EtOAc/petroleum ether = 1/50) as a yellow solid in 67% yield (51.6 mg, 0.134 mmol). Mp: 152 – 153 °C. <sup>1</sup>H NMR (CDCl<sub>3</sub>, 500 MHz): δ 9.96 (d, *J* = 3.6 Hz, 1H), 8.21 (dd, *J* = 9.0, 2.4 Hz, 1H), 8.14 (d, *J* = 9.0 Hz, 1H), 8.04 (d, *J* = 2.3 Hz, 1H), 7.32 – 7.27 (m, 3H), 7.21 – 7.17 (m, 3H), 7.16 – 7.13 (m, 2H), 7.10 – 7.07 (m, 2H), 6.97 (d, *J* = 3.6 Hz, 1H). <sup>13</sup>C NMR (CDCl<sub>3</sub>, 125 MHz): δ 186.5, 150.6, 149.1, 137.1, 136.8, 136.3, 135.9, 131.6, 130.9, 130.8, 129.5, 128.7, 128.6, 128.2, 128.1, 126.1, 123.7, 122.4, 116.3. HRMS (ESI): Calcd for C<sub>23</sub>H<sub>15</sub>NNaO<sub>3</sub>S [M+Na]<sup>+</sup> 408.0665, found: 408.0663.

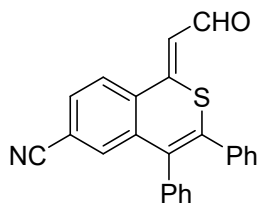

**(Z)-1-(2-oxoethylidene)-3,4-diphenyl-1H-isothiochromene-6-carbonitrile (3ja)**

The title compound was isolated by column chromatography (eluent: EtOAc/petroleum ether = 1/50) as a yellow solid in 68% yield (49.7 mg, 0.136 mmol). Mp: 91 – 92 °C. <sup>1</sup>H NMR (CDCl<sub>3</sub>, 500 MHz): δ 9.95 (d, *J* = 3.6 Hz, 1H), 8.08 (d, *J* = 8.5 Hz, 1H), 7.66 (dd, *J* = 8.5, 1.7 Hz, 1H), 7.47 (d, *J* = 1.6 Hz, 1H), 7.31 – 7.26 (m, 3H), 7.21 – 7.17 (m, 3H), 7.15 – 7.12 (m, 2H), 7.07 – 7.04 (m, 2H), 6.92 (d, *J* = 3.6 Hz, 1H). <sup>13</sup>C NMR (CDCl<sub>3</sub>, 125 MHz): δ 186.5, 150.9, 136.8, 136.3, 136.2, 136.0, 133.0, 131.1, 130.9, 130.6, 129.5, 129.4, 128.7, 128.6, 128.2, 128.0, 125.5, 117.9, 115.7, 114.8. HRMS (ESI): Calcd for C<sub>24</sub>H<sub>15</sub>NNaOS [M+Na]<sup>+</sup> 388.0767, found: 388.0763.

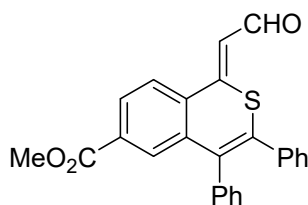

**methyl (Z)-1-(2-oxoethylidene)-3,4-diphenyl-1H-isothiochromene-6-carboxylate (3ka)**

The title compound was isolated by column chromatography (eluent: EtOAc/petroleum ether = 1/50) as a yellow solid in 74% yield (58.9 mg, 0.148 mmol). Mp: 118 – 119 °C. <sup>1</sup>H NMR (CDCl<sub>3</sub>, 500 MHz): δ 9.97 (d, *J* = 3.8 Hz, 1H), 8.12 – 8.06 (m, 2H), 7.91 (d, *J* = 1.4 Hz, 1H), 7.32 – 7.27 (m, 3H), 7.21 – 7.16 (m, 5H), 7.12 – 7.10 (m, 2H), 6.99 (d, *J* = 3.8 Hz, 1H), 3.86 (s, 3H). <sup>13</sup>C NMR (CDCl<sub>3</sub>, 125 MHz): δ 186.5, 165.9, 152.2, 136.8, 136.7, 135.5, 135.1, 132.4, 132.3, 131.0, 130.4, 129.7,

129.5, 128.7, 128.4, 128.3, 128.1, 127.6, 124.7, 114.9, 52.4. **HRMS (ESI):** Calcd for  $C_{25}H_{18}NaO_3S$   $[M+Na]^+$  421.0869, found: 421.0865.

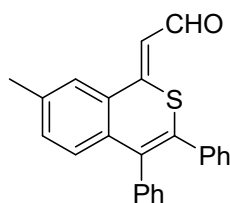

**(Z)-2-(7-methyl-3,4-diphenyl-1H-isothiochromen-1-ylidene)acetaldehyde (3la)**

The title compound was isolated by column chromatography (eluent: EtOAc/petroleum ether = 1/50) as a yellow solid in 81% yield (57.4 mg, 0.162 mmol). Mp: 164 – 165 °C.  **$^1H$  NMR ( $CDCl_3$ , 500 MHz):**  $\delta$  9.91 (d,  $J$  = 4.0 Hz, 1H), 7.87 (s, 1H), 7.27 – 7.21 (m, 4H), 7.19 – 7.12 (m, 5H), 7.12 – 7.06 (m, 3H), 6.93 (d,  $J$  = 4.0 Hz, 1H), 2.47 (s, 3H).  **$^{13}C$  NMR ( $CDCl_3$ , 125 MHz):**  $\delta$  186.3, 154.0, 138.6, 137.5, 137.1, 133.1, 132.9, 132.7, 132.4, 131.1, 129.8, 129.3, 128.1, 128.0, 127.2, 125.9, 124.4, 112.8, 21.4. **HRMS (ESI):** Calcd for  $C_{24}H_{18}NaOS$   $[M+Na]^+$  377.0971, found: 377.0972.

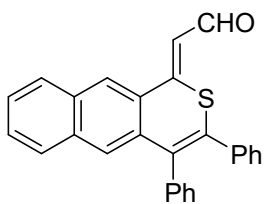

**(Z)-2-(3,4-diphenyl-1H-benzo[g]isothiochromen-1-ylidene)acetaldehyde (3ma)**

The title compound was isolated by column chromatography (eluent: EtOAc/petroleum ether = 1/50) as a yellow solid in 70% yield (54.6 mg, 0.140 mmol). Mp: 141 – 142 °C.  **$^1H$  NMR ( $CDCl_3$ , 500 MHz):**  $\delta$  10.07 (d,  $J$  = 4.8 Hz, 1H), 8.53 (s, 1H), 7.95 (d,  $J$  = 8.0 Hz, 1H), 7.65 (d,  $J$  = 7.9 Hz, 1H), 7.59 (s, 1H), 7.53 – 7.48 (m, 2H), 7.31 – 7.28 (m, 3H), 7.20 – 7.14 (m, 7H), 7.07 (d,  $J$  = 4.8 Hz, 1H).  **$^{13}C$  NMR ( $CDCl_3$ , 125 MHz):**  $\delta$  187.1, 153.7, 137.7, 137.4, 134.4, 132.5, 132.4, 132.1, 131.7, 131.3, 129.7, 128.6, 128.4, 128.2, 128.2, 128.1, 128.1, 128.0, 127.3, 127.2, 125.2, 124.7, 116.4. **HRMS (ESI):** Calcd for  $C_{27}H_{18}NaOS$   $[M+Na]^+$  413.0971, found: 413.0972.

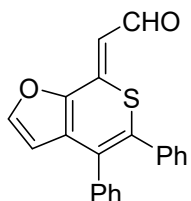

**(Z)-2-(4,5-diphenyl-7H-thiopyrano[3,4-b]furan-7-ylidene)acetaldehyde (3na)**

The title compound was isolated by column chromatography (eluent: EtOAc/petroleum ether = 1/50) as a yellow solid in 77% yield (50.8 mg, 0.154 mmol). Mp: 219 – 220 °C.  **$^1H$  NMR ( $CDCl_3$ , 500 MHz):**  $\delta$  9.66 (d,  $J$  = 2.1 Hz, 1H), 7.67 (d,  $J$  = 1.9 Hz, 1H), 7.26 – 7.19 (m, 8H), 7.13 – 7.11 (m, 2H), 6.72 (d,  $J$  = 2.0 Hz, 1H), 6.49 (d,  $J$  = 1.9 Hz, 1H).  **$^{13}C$  NMR ( $CDCl_3$ , 125 MHz):**  $\delta$  185.1, 146.2, 145.3, 142.8, 137.4,

136.4, 135.7, 131.2, 130.5, 129.9, 129.2, 128.5, 128.3, 128.2, 127.6, 110.6, 103.2. **HRMS (ESI):** Calcd for C<sub>21</sub>H<sub>14</sub>NaO<sub>2</sub>S [M+Na]<sup>+</sup> 353.0607, found: 353.0609.

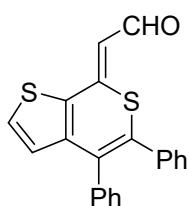

**(Z)-2-(4,5-diphenyl-7H-thieno[2,3-c]thiopyran-7-ylidene)acetaldehyde**

**(30a)**

The title compound was isolated by column chromatography (eluent: EtOAc/petroleum ether = 1/50) as a yellow solid in 84% yield (58.1 mg, 0.168 mmol). Mp: 234 – 235 °C. <sup>1</sup>H NMR (CDCl<sub>3</sub>, 500 MHz): δ 9.64 (d, *J* = 2.5 Hz, 1H), 7.49 (d, *J* = 5.4 Hz, 1H), 7.27 – 7.25 (m, 3H), 7.19 – 7.19 (m, 5H), 7.14 – 7.12 (m, 2H), 6.92 (d, *J* = 5.4 Hz, 1H), 6.56 (d, *J* = 2.5 Hz, 1H). <sup>13</sup>C NMR (CDCl<sub>3</sub>, 125 MHz): δ 184.8, 149.5, 143.3, 137.5, 137.3, 136.0, 132.3, 130.8, 130.3, 130.3, 129.1, 128.9, 128.4, 128.2, 128.1, 127.5, 107.1. **HRMS (ESI):** Calcd for C<sub>21</sub>H<sub>14</sub>NaOS<sub>2</sub> [M+Na]<sup>+</sup> 369.0378, found: 369.0375.

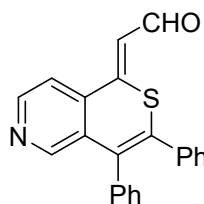

**(Z)-2-(3,4-diphenyl-1H-thiopyrano[4,3-c]pyridin-1-ylidene)acetaldehyde (3pa)**

The title compound was isolated by column chromatography (eluent: EtOAc/petroleum ether = 1/50) as a yellow solid in 61% yield (41.6 mg, 0.122 mmol). Mp: 81 – 82 °C. <sup>1</sup>H NMR (CDCl<sub>3</sub>, 500 MHz): δ 9.92 (d, *J* = 3.0 Hz, 1H), 8.59 (d, *J* = 49.9 Hz, 2H), 7.77 (s, 1H), 7.25 – 7.22 (m, 3H), 7.18 – 7.11 (m, 5H), 7.08 (d, *J* = 6.5 Hz, 2H), 7.00 (d, *J* = 3.0 Hz, 1H). <sup>13</sup>C NMR (CDCl<sub>3</sub>, 125 MHz): δ 186.5, 151.6, 150.4, 148.3, 136.3, 136.3, 135.6, 131.6, 130.9, 130.3, 129.6, 128.8, 128.5, 128.2, 127.8, 116.4, 114.4. **HRMS (ESI):** Calcd for C<sub>22</sub>H<sub>16</sub>NOS [M+H]<sup>+</sup> 342.0947, found: 342.0943.

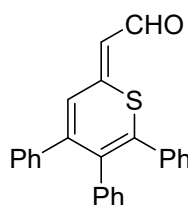

**(Z)-2-(4,5,6-triphenyl-2H-thiopyran-2-ylidene)acetaldehyde (3qa)**

The title compound was isolated by column chromatography (eluent: EtOAc/petroleum ether = 1/50) as a yellow solid in 65% yield (47.6 mg, 0.30 mmol). Mp: 57 – 58 °C. <sup>1</sup>H NMR (CDCl<sub>3</sub>, 500 MHz): δ 9.54 (d, *J* = 1.6 Hz, 1H), 7.19 – 7.12 (m, 8H), 7.03 – 6.99 (m, 2H), 6.96 – 6.90 (m, 4H), 6.75 – 6.70 (m, 2H), 6.23 (s, 1H). <sup>13</sup>C NMR (CDCl<sub>3</sub>, 125 MHz): δ 185.0, 153.2, 149.3, 143.7, 140.4, 137.0, 136.9, 134.0, 131.0, 129.8, 128.7, 128.4, 128.0, 127.7, 127.5, 127.4, 126.6, 126.5, 111.2. **HRMS (ESI):** Calcd for C<sub>25</sub>H<sub>18</sub>NaOS [M+Na]<sup>+</sup> 389.0971, found: 389.0974.

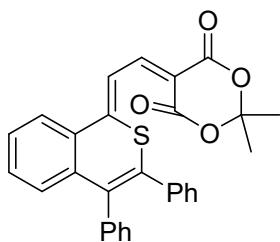

**(Z)-5-(2-(3,4-diphenyl-1H-isothiochromen-1-ylidene)ethylidene)-2,2-dimethyl-1,3-dioxane-4,6-dione (5)**

The title compound was isolated by column chromatography (eluent: EtOAc/petroleum ether = 1/50) as a purple solid in 92% yield (85.8 mg, 0.184 mmol). Mp: 159 – 160 °C. <sup>1</sup>H NMR (CDCl<sub>3</sub>, 500 MHz): δ 8.77 (d, *J* = 12.9 Hz, 1H), 8.49 (d, *J* = 12.9 Hz, 1H), 8.29 (d, *J* = 8.2 Hz, 1H), 7.57 (t, *J* = 7.5 Hz, 1H), 7.51 (t, *J* = 7.6 Hz, 1H), 7.30 – 7.28 (m, 4H), 7.25 – 7.21 (m, 3H), 7.19 – 7.17 (m, 2H), 7.13 (d, *J* = 6.8 Hz, 2H), 1.79 (s, 6H). <sup>13</sup>C NMR (CDCl<sub>3</sub>, 125 MHz): δ 164.1, 162.3, 160.5, 149.0, 136.8, 136.2, 136.1, 134.3, 134.0, 132.5, 131.0, 129.6, 129.2, 128.6, 128.3, 128.3, 127.8, 127.6, 125.1, 115.2, 105.1, 104.1, 27.5. HRMS (ESI): Calcd for C<sub>29</sub>H<sub>22</sub>NaO<sub>4</sub>S [M+Na]<sup>+</sup> 489.1131, found: 489.1137.

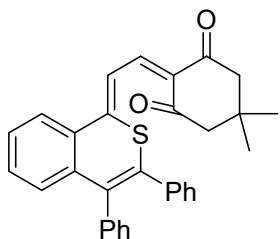

**(Z)-2-(2-(3,4-diphenyl-1H-isothiochromen-1-ylidene)ethylidene)-5,5-dimethylcyclohexane-1,3-dione (7)**

The title compound was isolated by column chromatography (eluent: EtOAc/petroleum ether = 1/50) as a purple solid in 87% yield (80.4 mg, 0.174 mmol). Mp: 168 – 169 °C. <sup>1</sup>H NMR (CDCl<sub>3</sub>, 500 MHz): δ 8.64 (d, *J* = 12.8 Hz, 1H), 8.45 (d, *J* = 12.8 Hz, 1H), 8.20 (d, *J* = 7.9 Hz, 1H), 7.48 (t, *J* = 7.7 Hz, 1H), 7.41 (t, *J* = 8.3 Hz, 1H), 7.26 – 7.22 (m, 3H), 7.20 – 7.13 (m, 6H), 7.09 – 7.07 (m, 2H), 2.54 (s, 2H), 2.51 (s, 2H), 1.09 (s, 6H). <sup>13</sup>C NMR (CDCl<sub>3</sub>, 125 MHz): δ 199.4, 197.8, 158.9, 143.4, 137.1, 136.6, 135.8, 134.3, 133.5, 131.8, 131.1, 129.6, 129.3, 129.0, 128.3, 128.3, 128.2, 127.4, 125.0, 124.6, 116.8, 54.0, 52.2, 28.59. HRMS (ESI): Calcd for C<sub>31</sub>H<sub>26</sub>NaO<sub>2</sub>S [M+Na]<sup>+</sup> 485.1546, found: 485.1549.

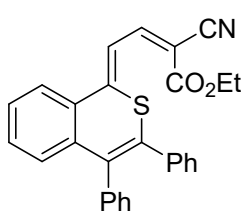

**ethyl (Z)-2-cyano-4-((Z)-3,4-diphenyl-1H-isothiochromen-1-ylidene)but-2-enoate (9)**

The title compound was isolated by column chromatography (eluent: EtOAc/petroleum ether = 1/50) as a red solid in 86% yield (74.8 mg, 0.172 mmol). Mp: 172 – 173 °C. <sup>1</sup>H NMR (CDCl<sub>3</sub>, 500 MHz): δ 8.46 (d, *J* = 12.5 Hz, 1H), 8.03 (d, *J* = 7.5 Hz, 1H), 7.47 (t, *J* = 7.7 Hz, 1H), 7.40 (t, *J* = 7.1 Hz, 1H), 7.27 – 7.23 (m, 3H),

7.20 – 7.18 (m, 4H), 7.16 – 7.13 (m, 3H), 7.09 – 7.08 (m, 2H), 4.32 (q,  $J = 7.1$  Hz, 2H), 1.36 (t,  $J = 7.1$  Hz, 3H).  $^{13}\text{C}$  NMR ( $\text{CDCl}_3$ , 125 MHz):  $\delta$  163.3, 152.5, 148.2, 137.0, 136.6, 135.6, 133.0, 133.0, 131.6, 131.0, 129.4, 129.3, 129.1, 128.3, 128.3, 128.2, 127.5, 127.4, 124.4, 115.9, 113.7, 100.2, 61.9, 14.2. HRMS (ESI): Calcd for  $\text{C}_{28}\text{H}_{21}\text{NNaO}_2\text{S}$   $[\text{M}+\text{Na}]^+$  458.1185, found: 458.1187.

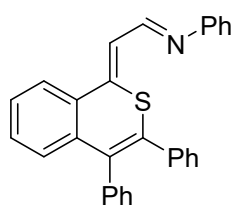

**(E)-2-((Z)-3,4-diphenyl-1H-isothiochromen-1-ylidene)-N-phenylethan-1-imine (11)**

The title compound was isolated by column chromatography (eluent: EtOAc/petroleum ether = 1/50) as a red solid in 90% yield (74.7 mg, 0.180 mmol). Mp: 111 – 112 °C.  $^1\text{H}$  NMR ( $\text{CDCl}_3$ , 500 MHz):  $\delta$  8.75 (d,  $J = 9.2$  Hz, 1H), 7.87 (d,  $J = 7.5$  Hz, 1H), 7.42 – 7.34 (m, 3H), 7.30 (t,  $J = 7.7$  Hz, 1H), 7.24 – 7.14 (m, 11H), 7.10 – 7.08 (m, 2H), 7.04 (d,  $J = 8.0$  Hz, 1H), 6.99 (d,  $J = 9.2$  Hz, 1H).  $^{13}\text{C}$  NMR ( $\text{CDCl}_3$ , 125 MHz):  $\delta$  156.5, 152.0, 144.5, 137.7, 137.4, 134.9, 132.3, 132.3, 131.1, 130.0, 129.2, 129.1, 128.7, 128.7, 128.6, 128.1, 128.1, 127.9, 127.1, 125.9, 124.3, 121.1, 120.2. HRMS (ESI): Calcd for  $\text{C}_{29}\text{H}_{21}\text{NNaS}$   $[\text{M}+\text{Na}]^+$  438.1287, found: 438.1285.

## 5. X-ray Crystallography of 3aa

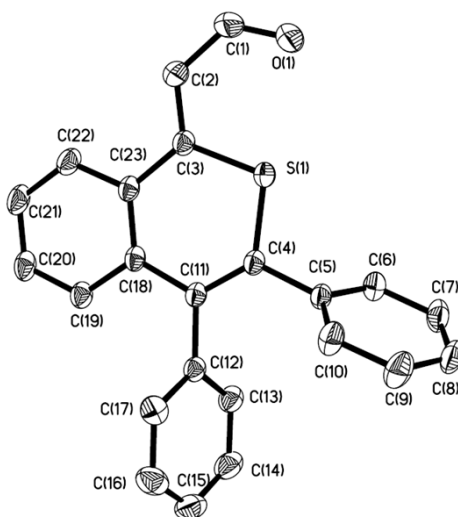

**Figure S1.** The molecular structure of **3aa**

### Crystal preparation of compound 3aa.

Compound **3aa** (25 mg) was dissolved in 5 mL of dichloromethane/*n*-hexane ( $v_1/v_2 = 1:1$ ), and it was crystallized to give crystal as colorless prisms after the solvent was slowly



volatilized in 4 days at room temperature (~ 25 °C).

CCDC-2308326 (**3aa**), contain the supplementary crystallographic data. These data can be obtained free of charge from the Cambridge Crystallographic Data Centre (<http://www.ccdc.cam.ac.uk/>). Thermal ellipsoids are shown at the 30% level. Hydrogen atoms have been omitted for clarity. X-ray crystallographic data for **3aa** is available as Figure S1.

**Table S3. Crystal Data and Summary of X-ray Data Collection for 3aa**

|                                   |                                                                                                                           |
|-----------------------------------|---------------------------------------------------------------------------------------------------------------------------|
| Empirical formula                 | C23 H16 O S                                                                                                               |
| Formula weight                    | 340.42                                                                                                                    |
| Temperature                       | 273.15 K                                                                                                                  |
| Wavelength                        | 0.71073 Å                                                                                                                 |
| Crystal system, space group       | monoclinic, P2 <sub>1</sub> /n                                                                                            |
| Unit cell dimensions              | a = 12.7462(15) Å    alpha = 90 deg.<br>b = 9.1384(10) Å    beta = 95.183(4) deg.<br>c = 15.0589(17) Å    gamma = 90 deg. |
| Volume                            | 1746.9(3) Å <sup>3</sup>                                                                                                  |
| Z, Calculated density             | 4, 1.294 Mg/m <sup>3</sup>                                                                                                |
| Absorption coefficient            | 0.192 mm <sup>-1</sup>                                                                                                    |
| F(000)                            | 712.0                                                                                                                     |
| Theta range for data collection   | 4.388 to 61.354 deg.                                                                                                      |
| Limiting indices                  | -18<=h<=18, -10<=k<=13, -21<=l<=21                                                                                        |
| Reflections collected / unique    | 28047 / 2820 [R(int) = 0.0262]                                                                                            |
| Max. and min. transmission        | 0.6687 and 0.7461                                                                                                         |
| Data / restraints / parameters    | 5329 / 6 / 226                                                                                                            |
| Goodness-of-fit on F <sup>2</sup> | 1.045                                                                                                                     |
| Final R indices [I>2sigma(I)]     | R1 = 0.0403, wR2 = 0.1094                                                                                                 |
| R indices (all data)              | R1 = 0.0529, wR2 = 0.1182                                                                                                 |
| Largest diff. peak and hole       | 0.27 and -0.26 e.Å <sup>-3</sup>                                                                                          |

## 6. Mechanism Research

### (a) Competition KIE Experiments

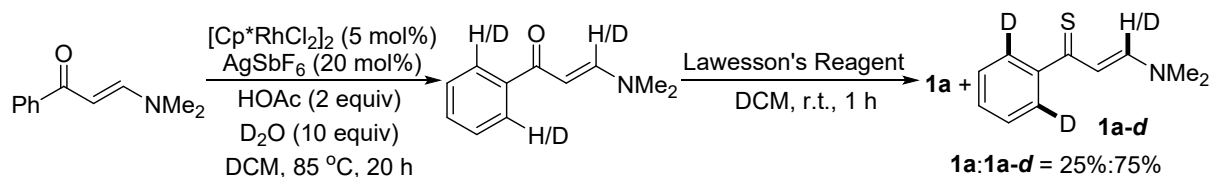

A mixture of *(E)*-3-(dimethylamino)-1-phenylprop-2-en-1-one (175.1 mg, 1 mmol, 1.0 equiv),  $[\text{Cp}^*\text{RhCl}_2]_2$  (0.05 mmol, 5 mol%) and  $\text{AgSbF}_6$  (0.2 mmol, 20 mol%) were weighed in a Schlenk tube equipped with a stir bar. Dry DCM (5 mL), HOAc (2 mmol, 2 equiv), and  $\text{D}_2\text{O}$  (20 mmol, 10 equiv) were added and the mixture was stirred at 85 °C in a pre-heated oil bath for 20 h under  $\text{N}_2$  atmosphere. Then, deuterated enaminone was obtained by column chromatography on silica gel with EtOAc/petroleum ether, and treated by Lawesson's Reagent (1 equiv) in DCM (10 mL) at room temperature for 1 h. Finally, a mixture (71% yield) of **1a** and **1a-d** was presented by column chromatography on silica gel with EtOAc/petroleum ether with 25%:75%.

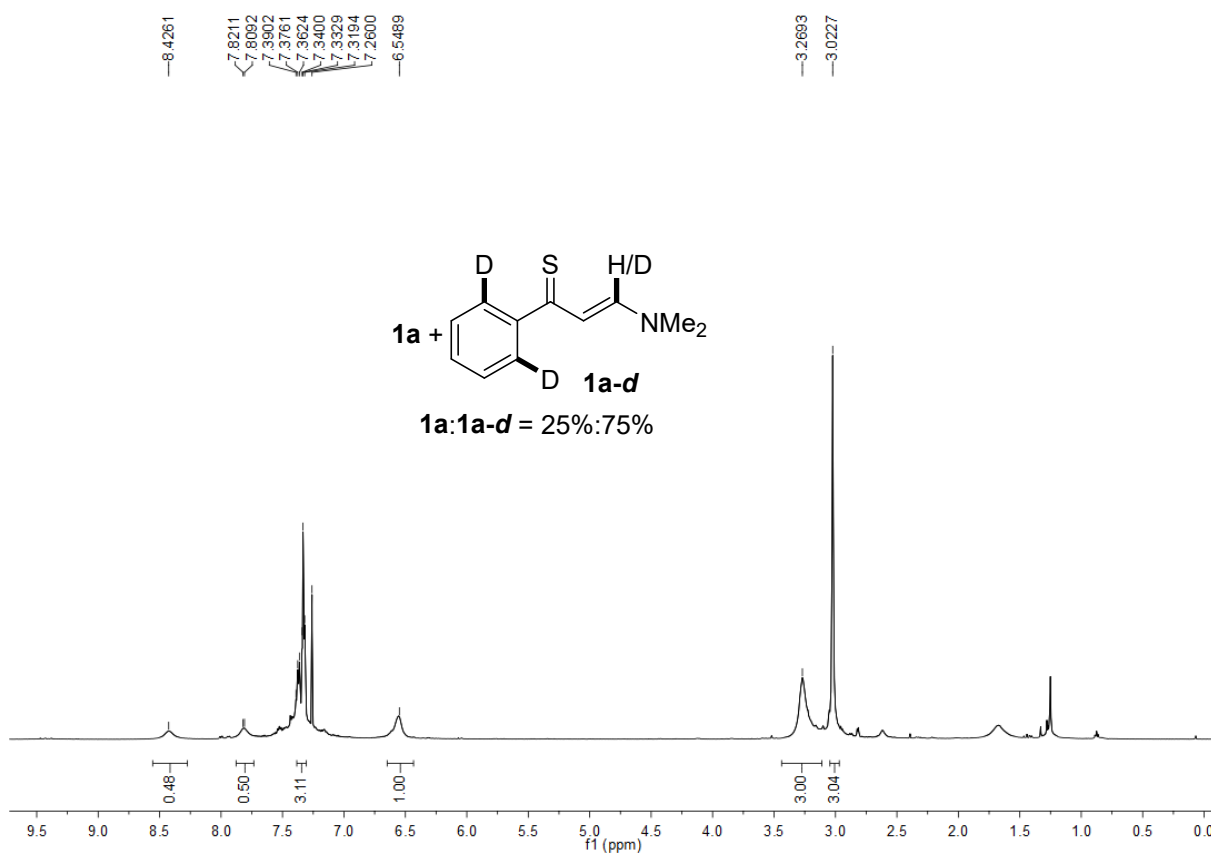

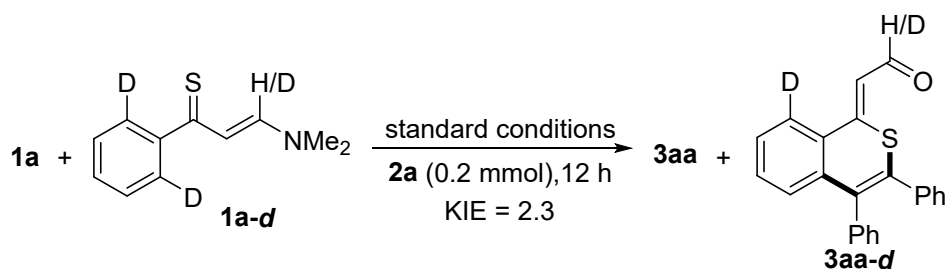

A mixture of (E)-3-(dimethylamino)-1-phenylprop-2-ene-1-thione (**1a**) (38.2 mg, 0.2 mmol, 1.0 equiv), **1a-d** (38.6 mg, 0.2 mmol, 1.0 equiv), **2a** (35.6 mg, 0.2 mmol, 1.0 equiv), [(Cp\*RhCl<sub>2</sub>)<sub>2</sub>] (0.01 mmol, 5 mol%), AgSbF<sub>6</sub> (0.04 mmol, 20 mol%), and AgOAc (0.3 mmol, 1.5 equiv) were weighted in a Schlenk tube equipped with a stir bar. Dry DCE (1.5 mL), HOAc (3 equiv), and H<sub>2</sub>O (1.6 mmol, 8 equiv) were added and the mixture was stirred at 60 °C in a pre-heated oil bath for 12 h under N<sub>2</sub> atmosphere. Then, the mixture was cooled to room temperature and concentrated in vacuo and the resulting residue was purified by flash column chromatography on silica gel with EtOAc/petroleum ether. The KIE value was determined to be  $k_{\text{H}}/k_{\text{D}} = 2.3$  on the basis of <sup>1</sup>H NMR analysis.

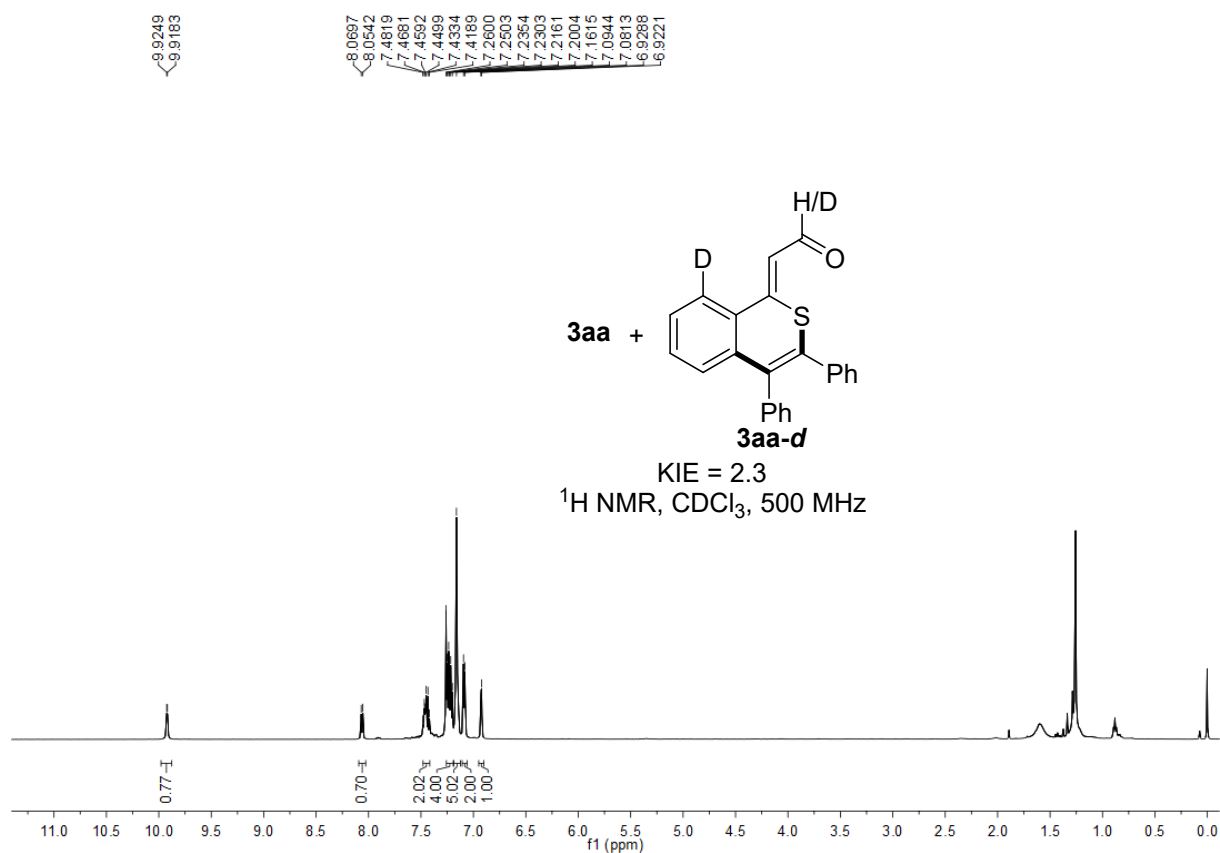

## (b) Parallel KIE Experiments

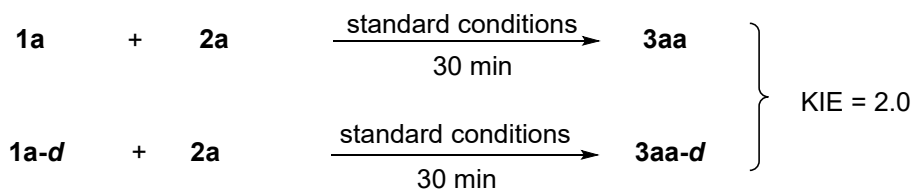

A mixture of **2a** (53.4 mg, 0.3 mmol, 1.5 equiv), [(Cp\**Rh*Cl<sub>2</sub>)<sub>2</sub>] (0.01 mmol, 5 mol%), AgSbF<sub>6</sub> (0.04 mmol, 20 mol%), and AgOAc (0.3 mmol, 1.5 equiv) were weighted in each of two Schlenk tube equipped with a stir bar. To the parallel tubes was then separately introduced **1a** (38.2 mg, 0.2 mmol, 1.0 equiv) and **1a-d** (38.6 mg, 0.2 mmol, 1.0 equiv). Dry DCE (1.5 mL), HOAc (3 equiv), and H<sub>2</sub>O (1.6 mmol, 8 equiv) were added and the mixture was stirred at 60 °C in a pre-heated oil bath for 12 h under N<sub>2</sub> atmosphere. Then, the mixture was cooled to room temperature and concentrated in vacuo and the resulting residue was purified by flash column chromatography on silica gel with EtOAc/petroleum ether to give the desired product **3aa** in 21.6% yield (14.7 mg, 0.0432 mmol) or **3aa-d** in 10.3% yield (7.0 mg, 0.0205 mmol). The KIE value was calculated to be  $k_H/k_D = 2.0$  according to isolated yields of **3aa** and **3aa-d**.

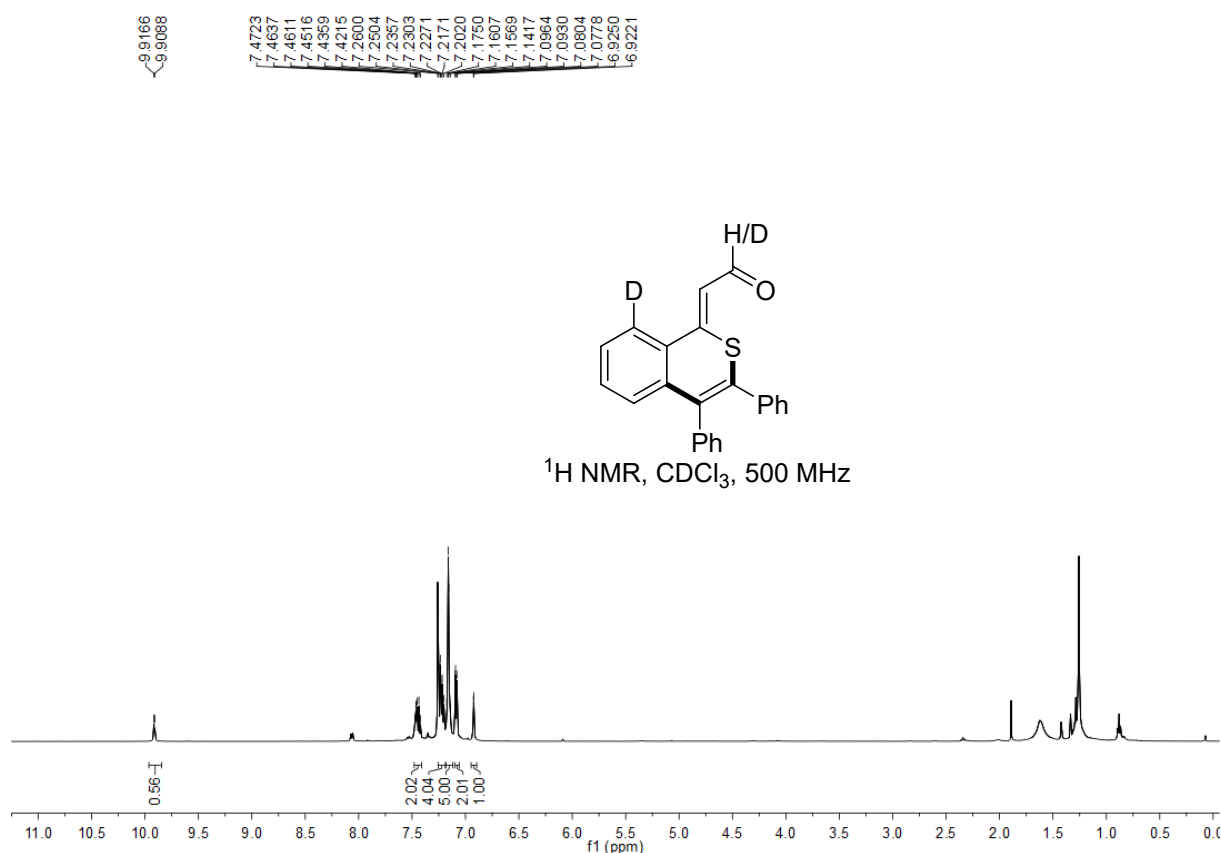

### (c) Competition Experiment of **1b** and **1h**

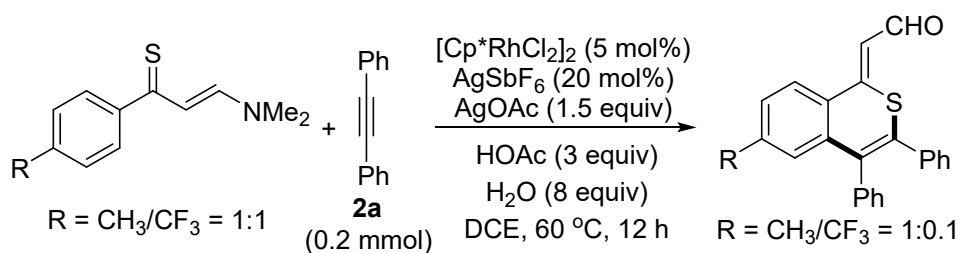

A mixture of (*E*)-3-(dimethylamino)-1-(*p*-tolyl)prop-2-ene-1-thione (**1b**) (41.0 mg, 0.2 mmol, 1.0 equiv), (*E*)-3-(dimethylamino)-1-(4-(trifluoromethyl)phenyl)prop-2-ene-1-thione (**1h**) (51.8 mg, 0.2 mmol, 1.0 equiv), 1,2-diphenylethyne (**2a**) (35.6 mg, 0.2 mmol, 1.0 equiv), [(Cp\**RhCl*<sub>2</sub>)<sub>2</sub>] (0.01 mmol, 5 mol%), AgSbF<sub>6</sub> (0.04 mmol, 20 mol%), and AgOAc (0.3 mmol, 1.5 equiv) were weighted in a Schlenk tube equipped with a stir bar. Dry DCE (1.5 mL), HOAc (3 equiv), and H<sub>2</sub>O (1.6 mmol, 8 equiv) were added and the mixture was stirred at 60 °C in a pre-heated oil bath for 12 h under N<sub>2</sub> atmosphere. Then, the mixture was cooled to room temperature and concentrated in vacuo and the resulting residue was purified by flash column chromatography on silica gel with EtOAc/petroleum ether to give a mixture of products **3ba** and **3ha** at a ratio of 1:0.1.

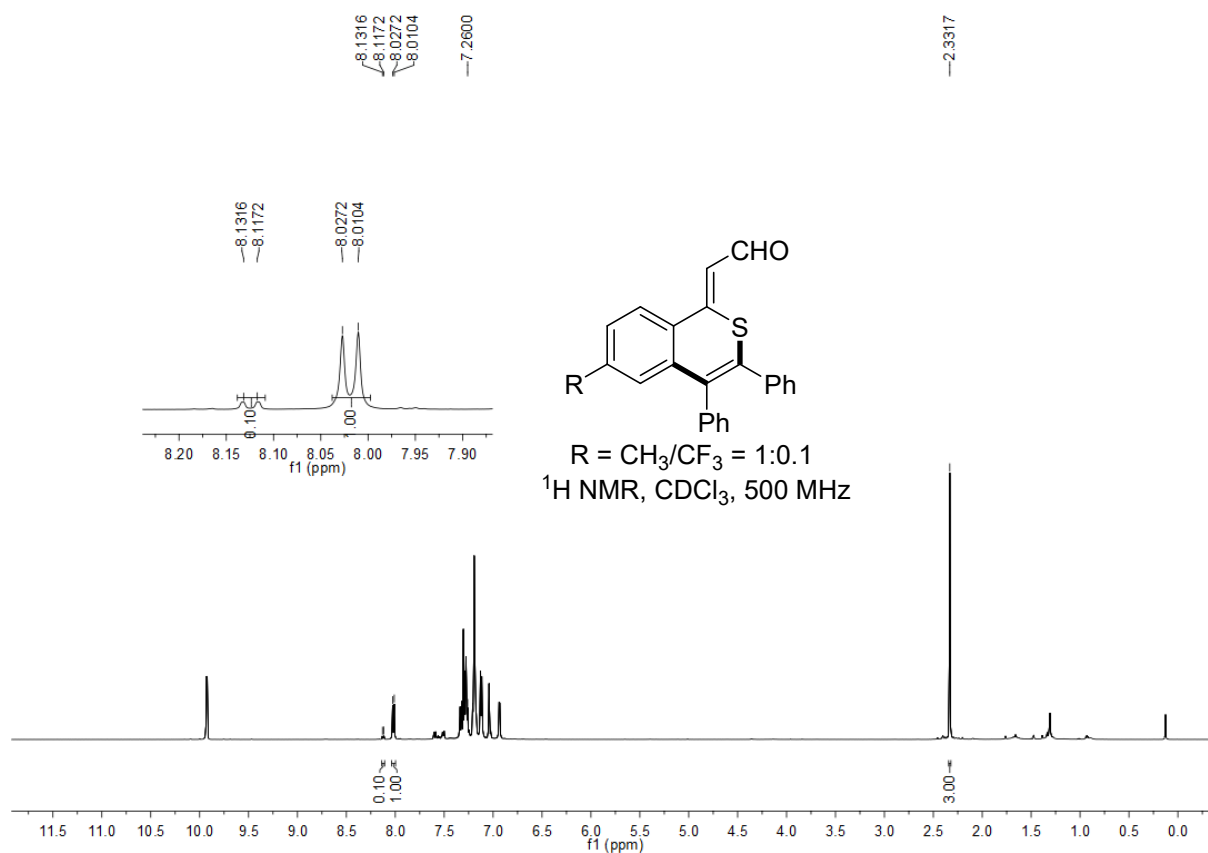

**(d) Competition Experiment of 2b and 2g**

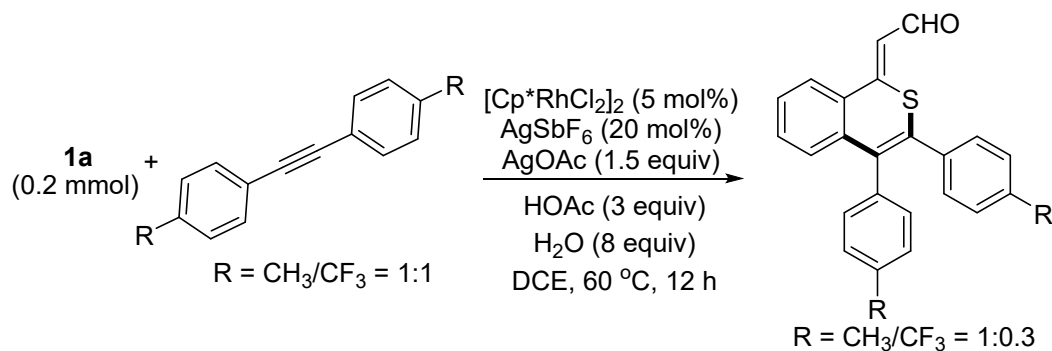

A mixture of (*E*)-3-(dimethylamino)-1-phenylprop-2-ene-1-thione (**1a**) (38.2 mg, 0.2 mmol, 1.0 equiv), (51.8 mg, 0.2 mmol, 1.0 equiv), 1,2-di-*p*-tolylethyne (**2b**) (41.2 mg, 0.2 mmol, 1.0 equiv), (51.8 mg, 0.2 mmol, 1.0 equiv), 1,2-bis(4-(trifluoromethyl)phenyl)ethyne (**2g**) (62.8 mg, 0.2 mmol, 1.0 equiv),  $[(\text{Cp}^*\text{RhCl}_2)_2]$  (0.01 mmol, 5 mol%),  $\text{AgSbF}_6$  (0.04 mmol, 20 mol%), and  $\text{AgOAc}$  (0.3 mmol, 1.5 equiv) were weighted in a Schlenk tube equipped with a stir bar. Dry DCE (1.5 mL),  $\text{HOAc}$  (3 equiv), and  $\text{H}_2\text{O}$  (1.6 mmol, 8 equiv) were added and the mixture was stirred at 60 °C in a pre-heated oil bath for 12 h under  $\text{N}_2$  atmosphere. Then, the mixture was cooled to room temperature and concentrated in vacuo and the resulting residue was purified by flash column chromatography on silica gel with  $\text{EtOAc}$ /petroleum ether to give a mixture of products **3ab** and **3ag** at a ratio of 1:0.3.

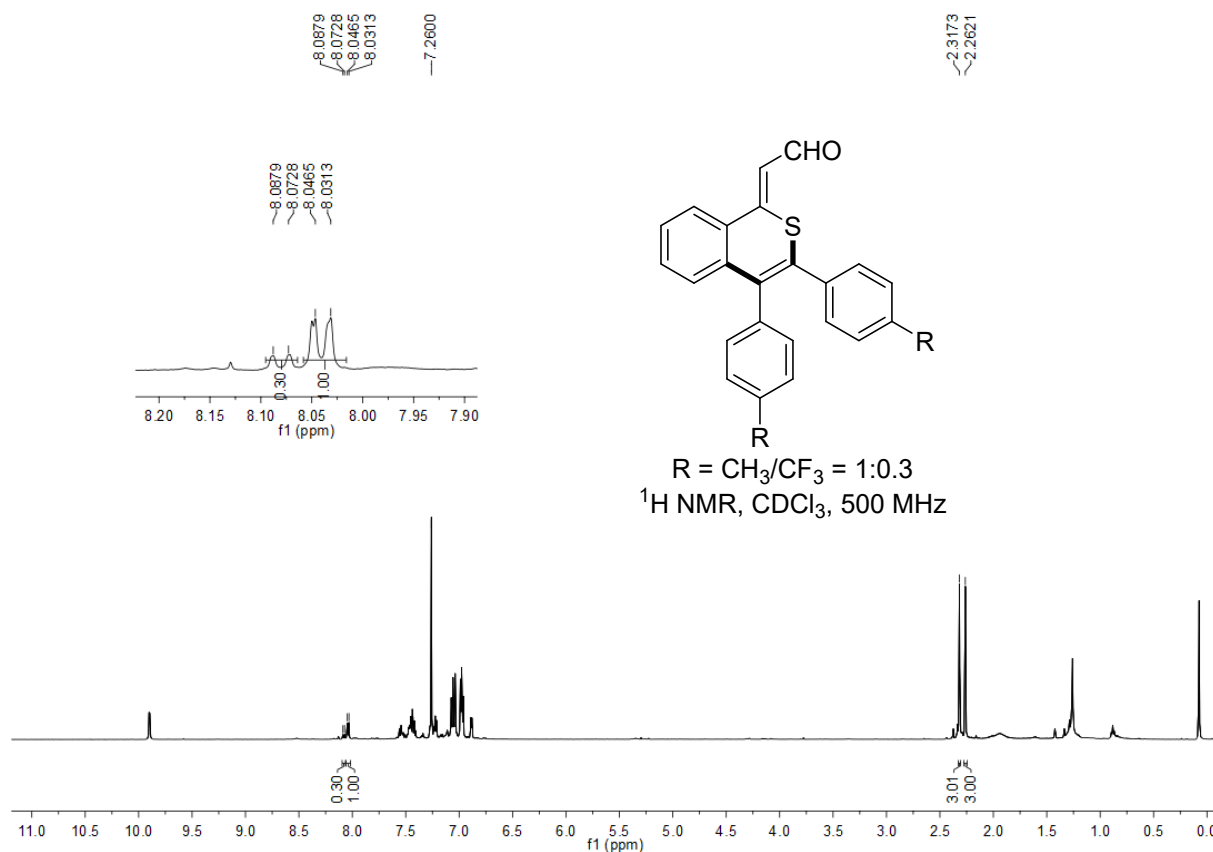

## 7. References:

(1) White, C.; Yates, A.; Maitlis, P. M. *Inorg. Synth.* **1992**, *29*, 228–234.

(2) Zhang, X.; Zhang, J.; Chen, J.; Zhou, B.; Zhang, J.; Chen, S.; Wu, J.; Jiang, Y. *Org. Biomol. Chem.* **2023**, *21*, 3345–3349.

## 8. NMR Spectra

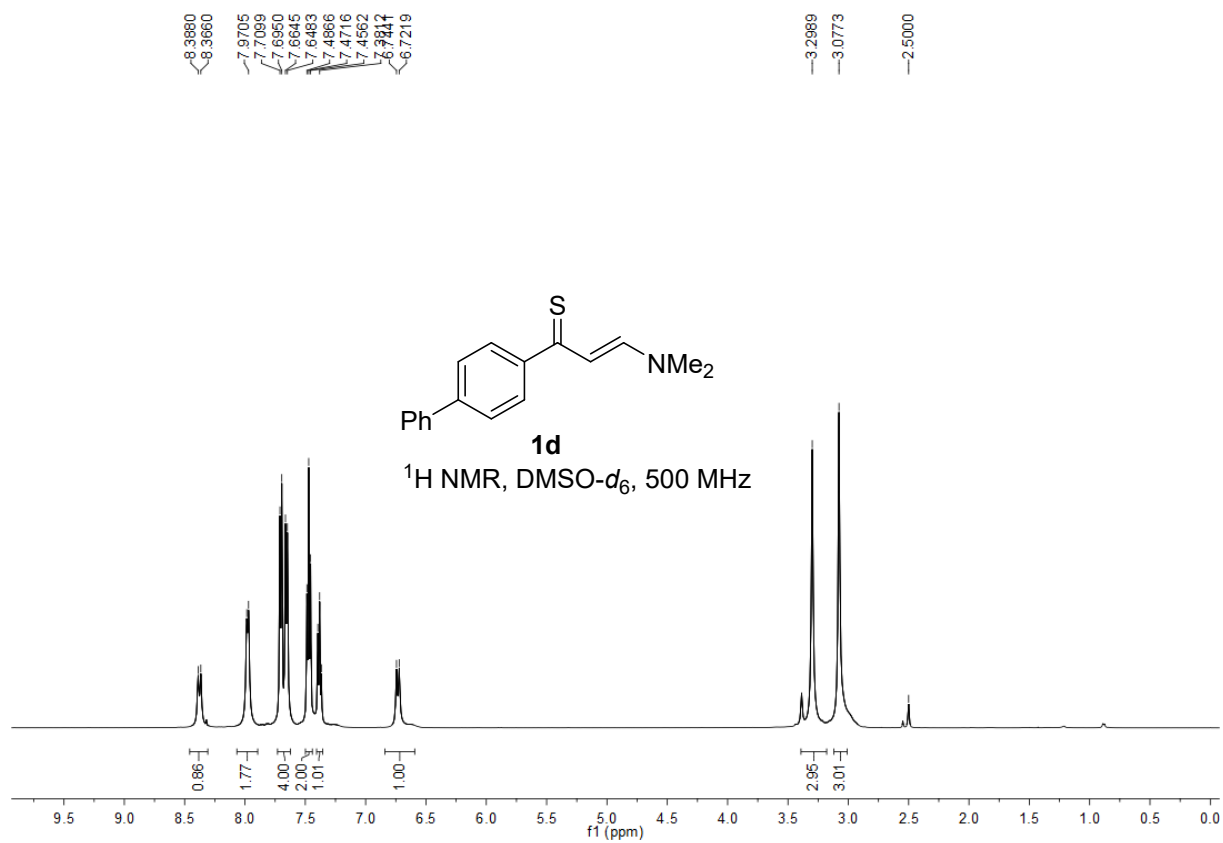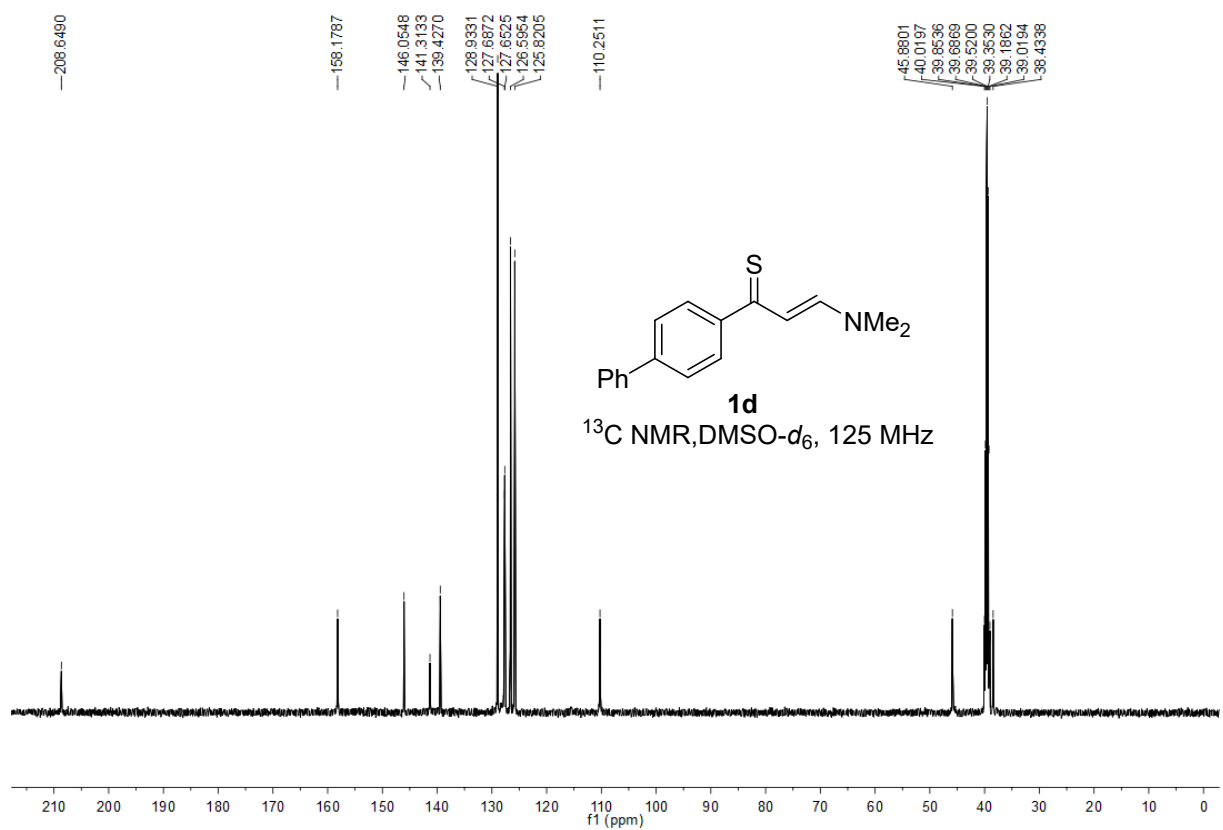



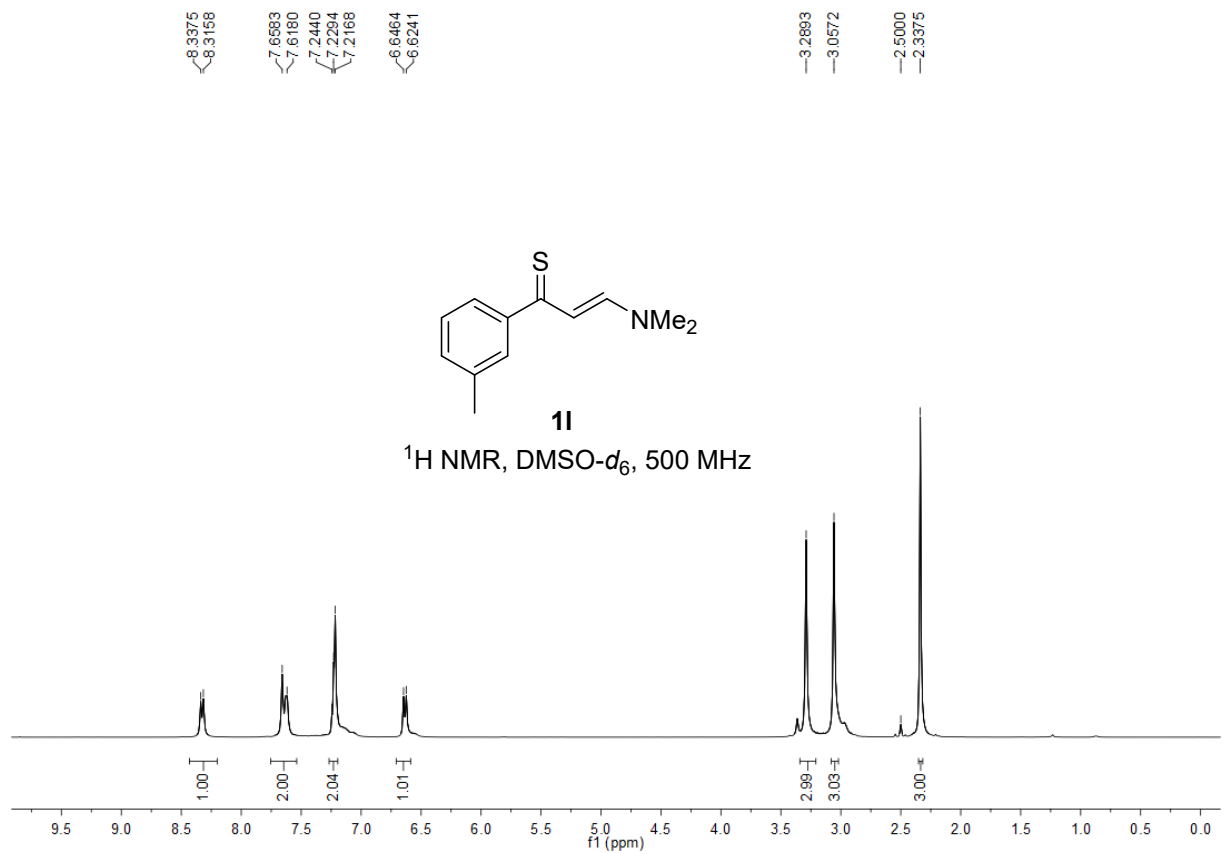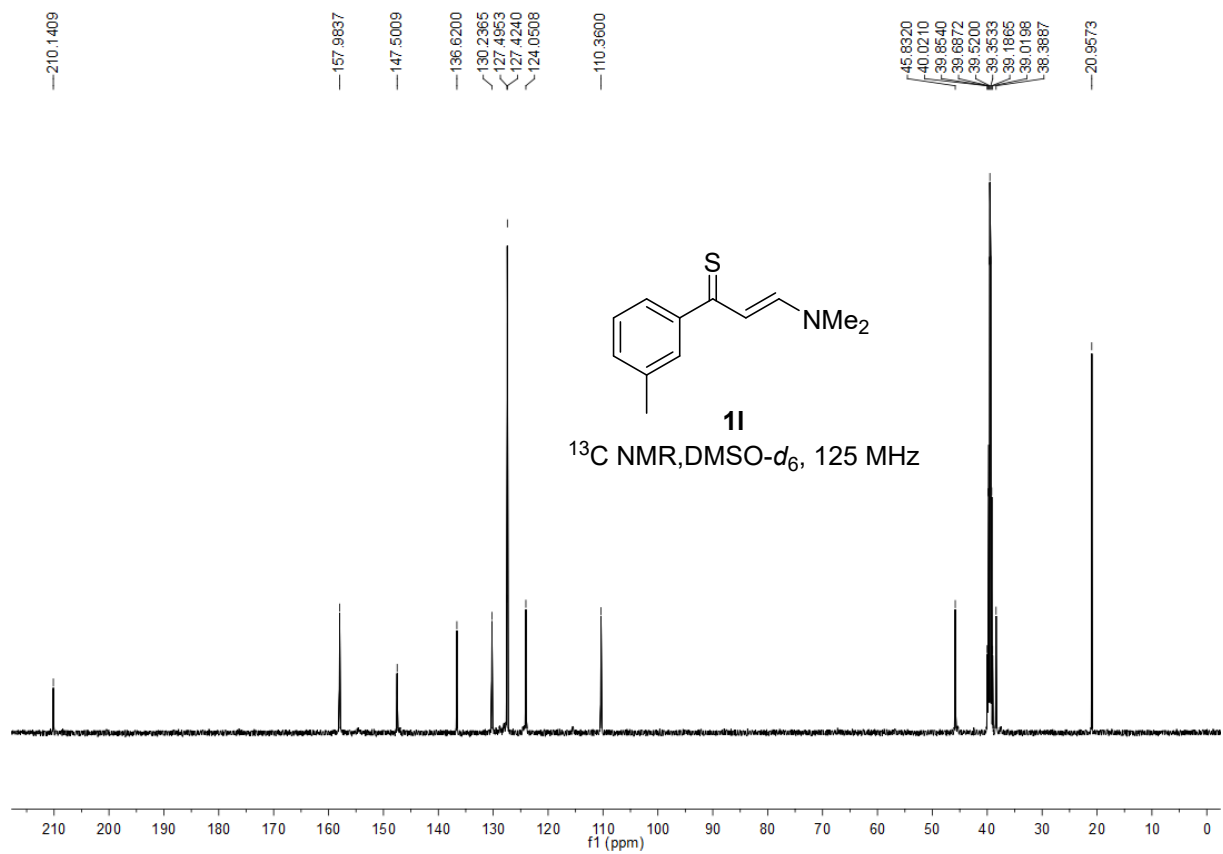

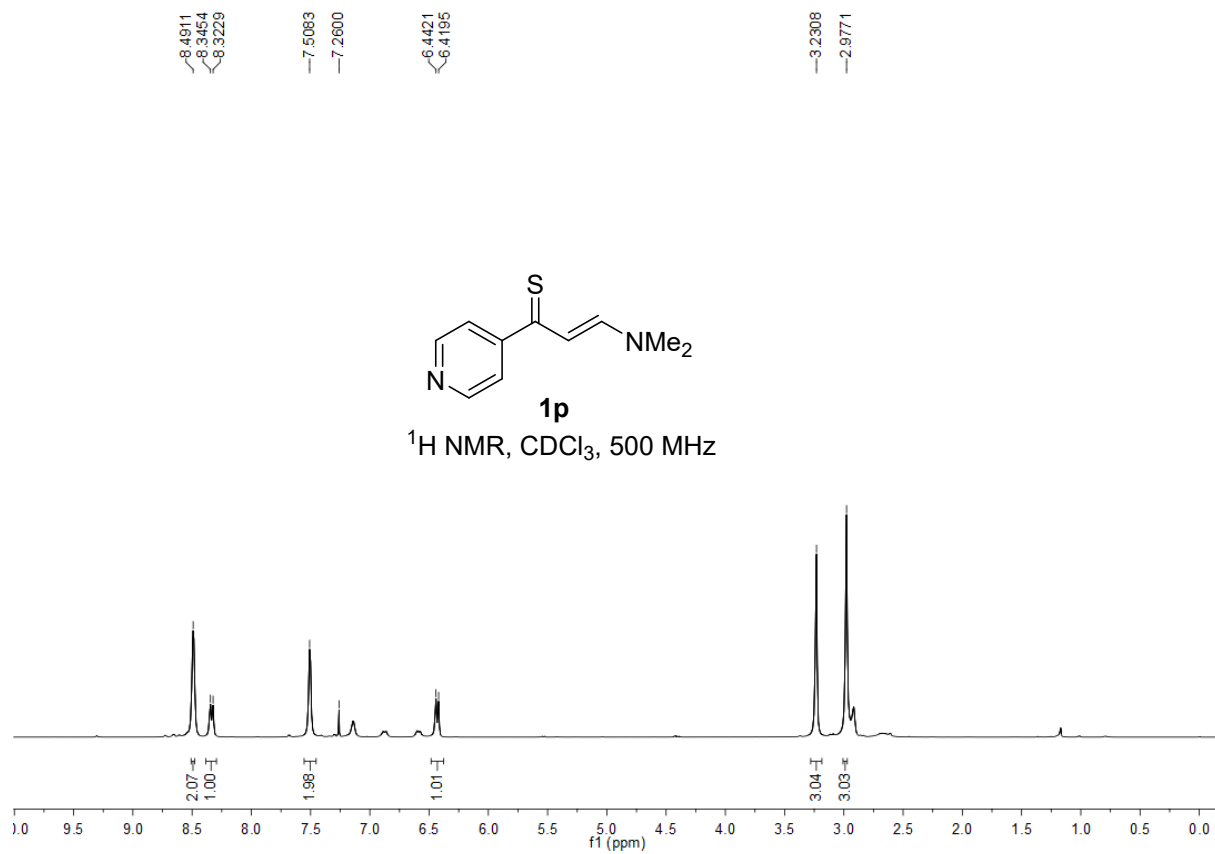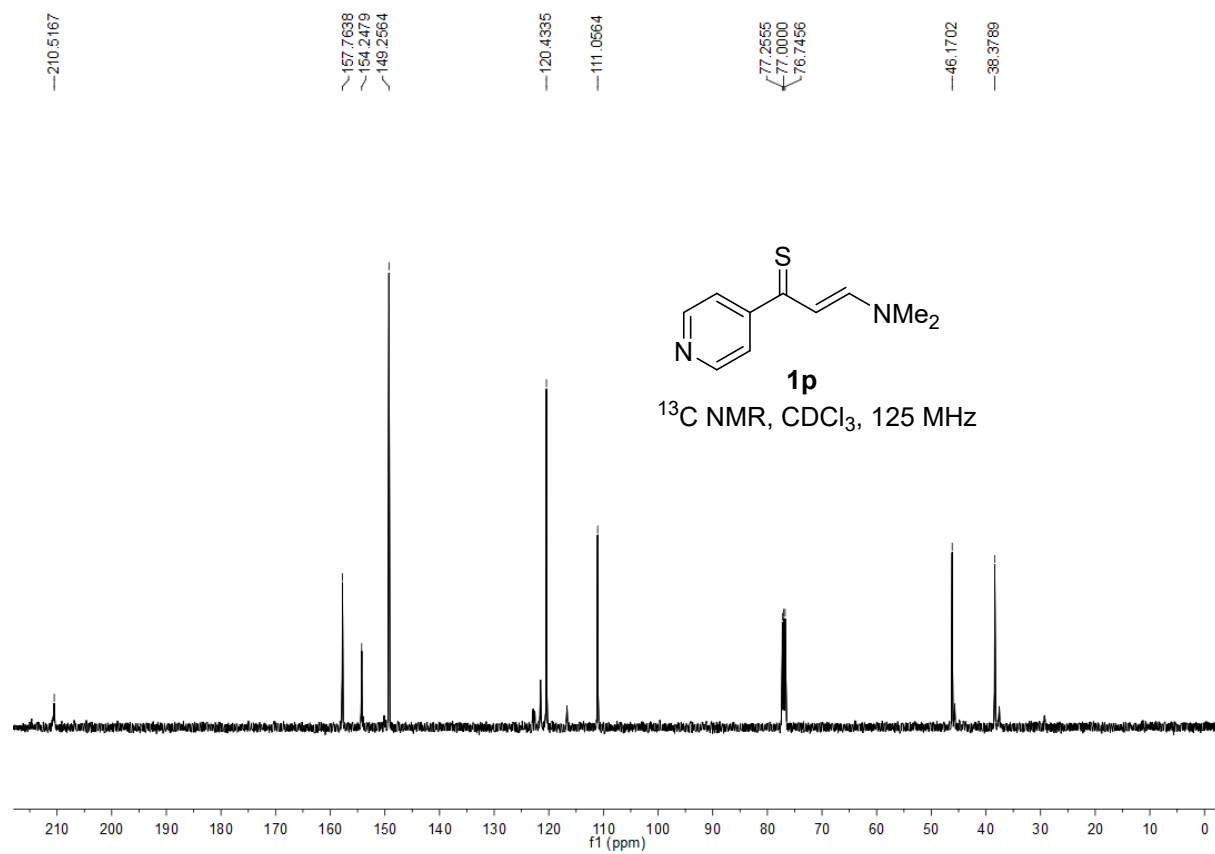

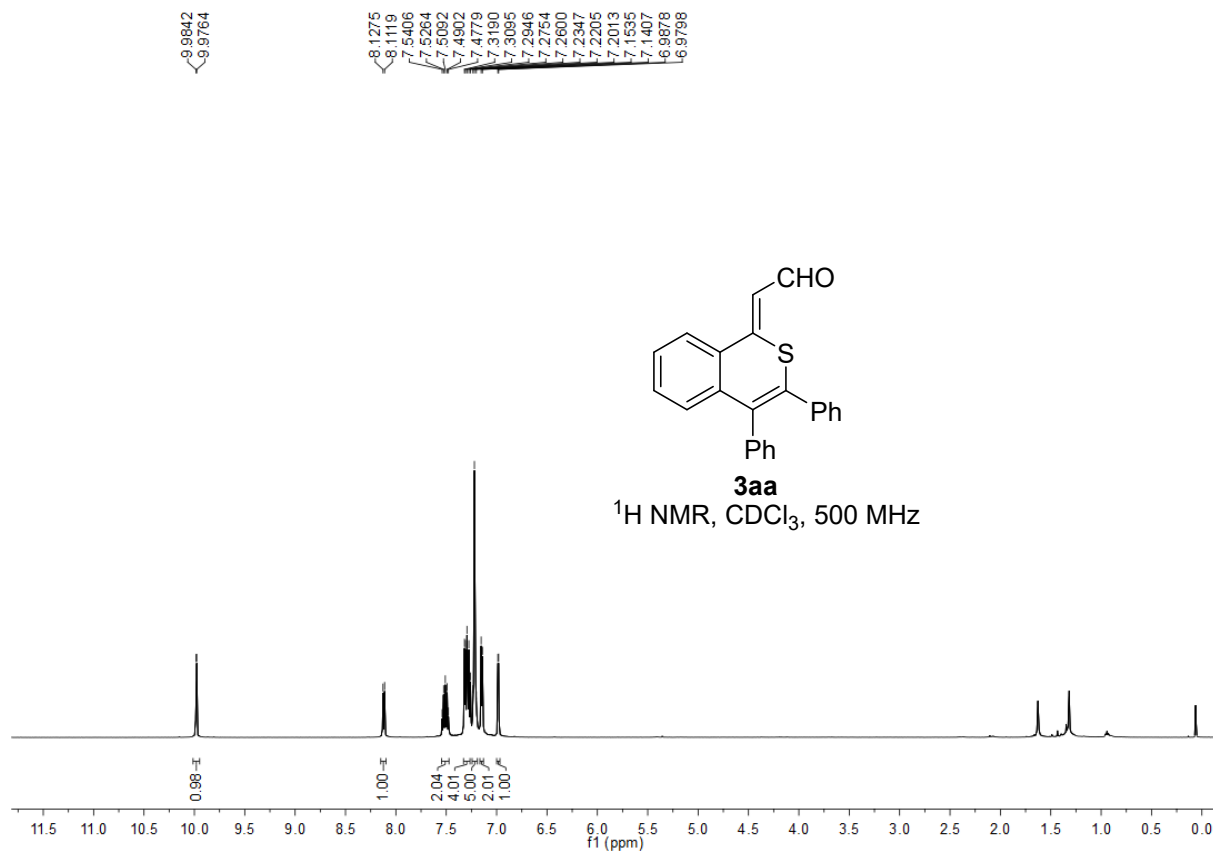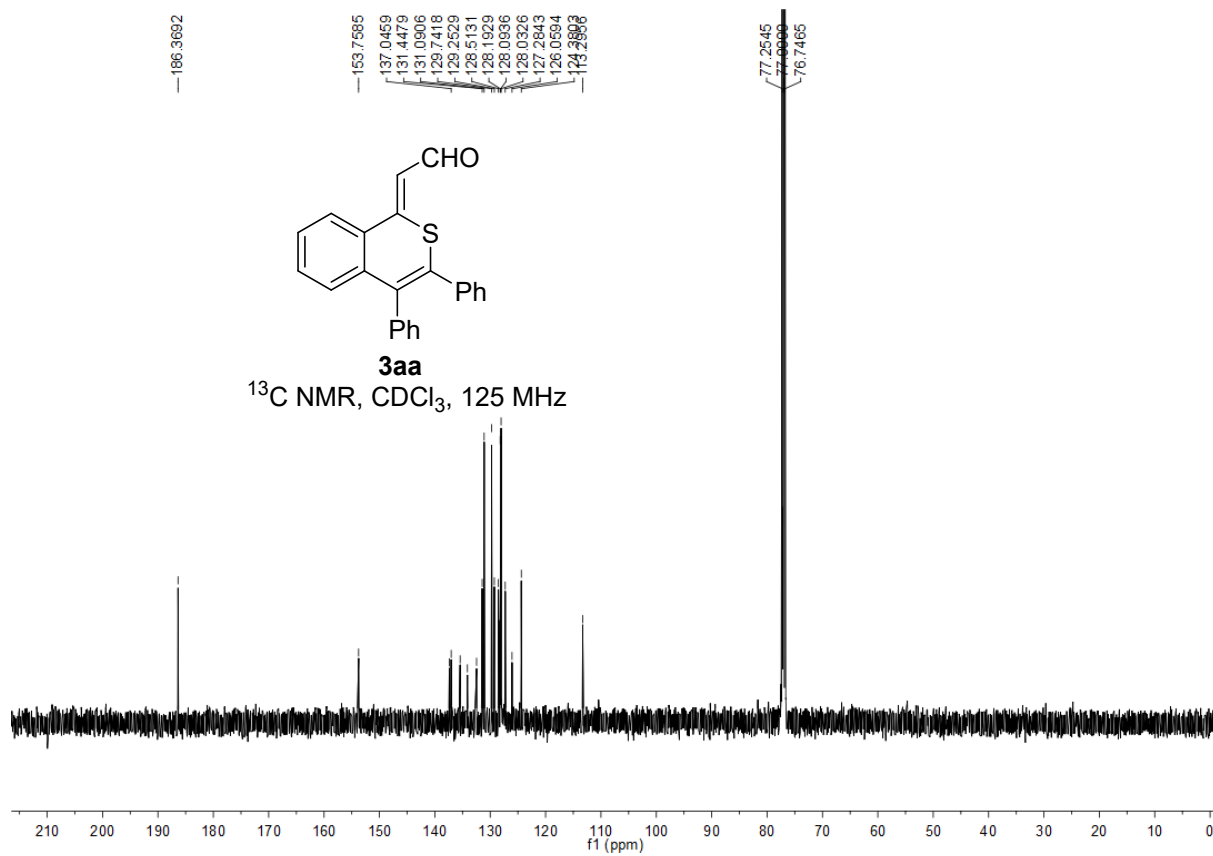

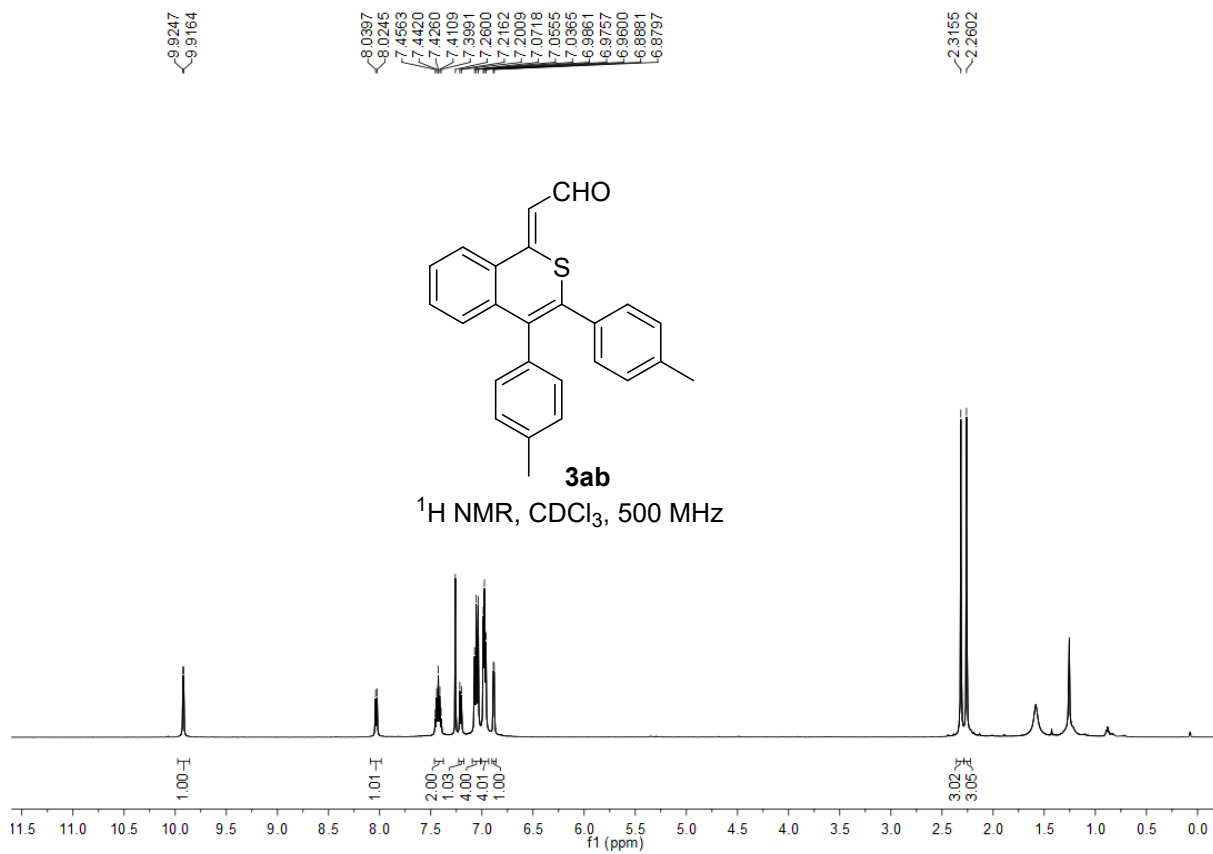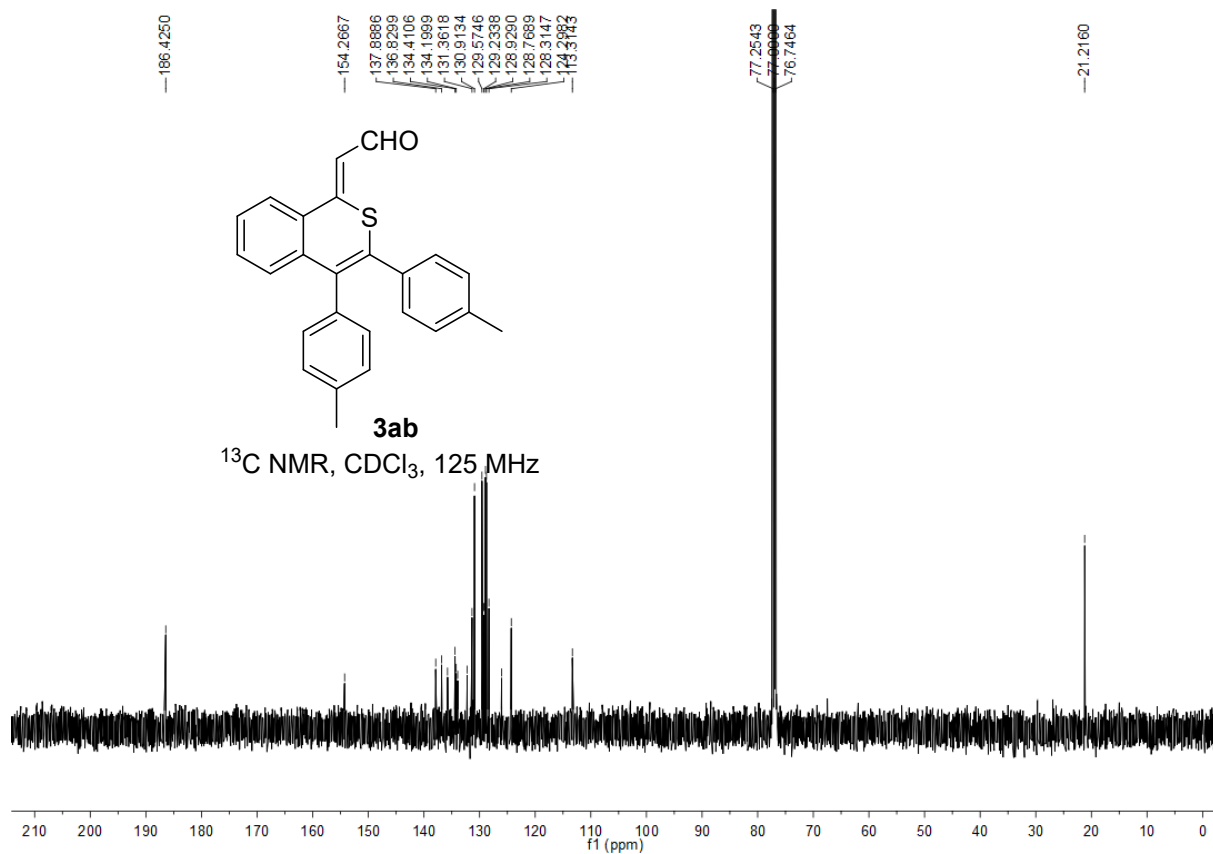

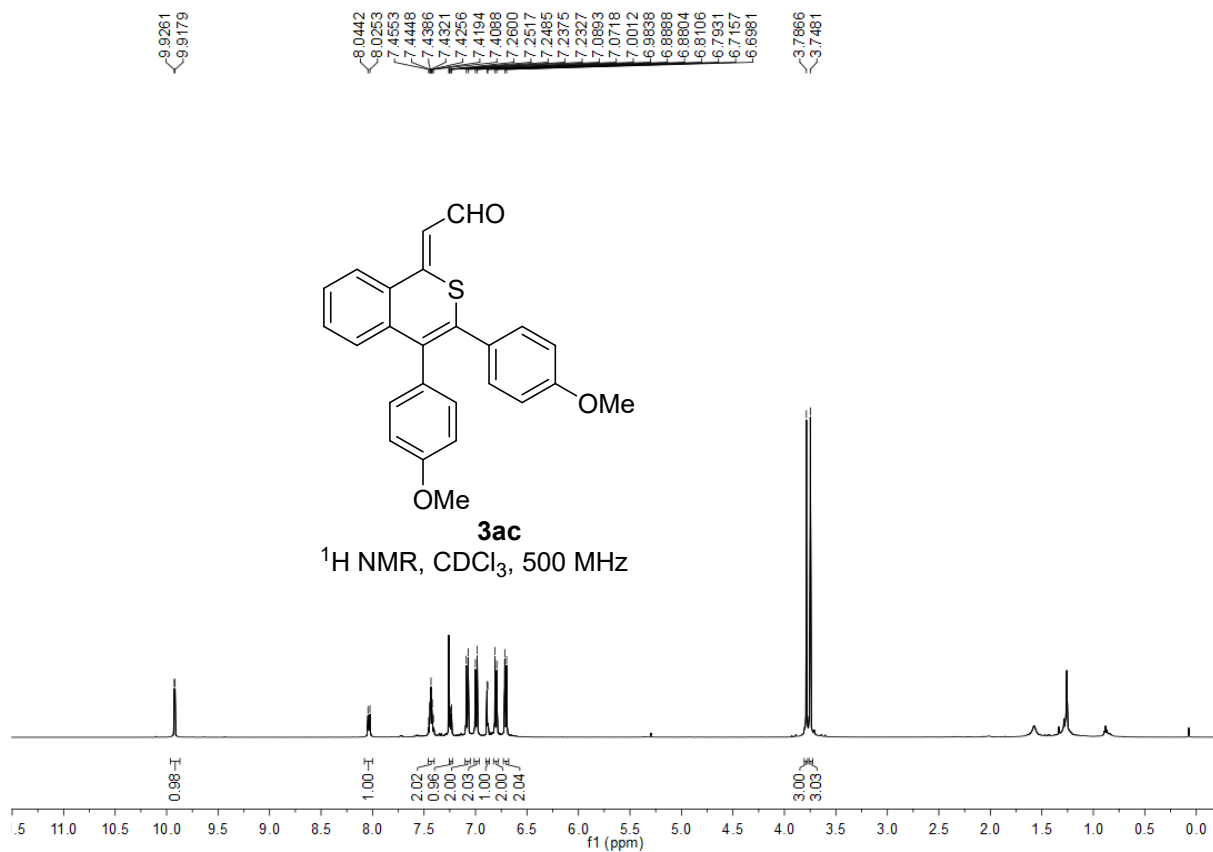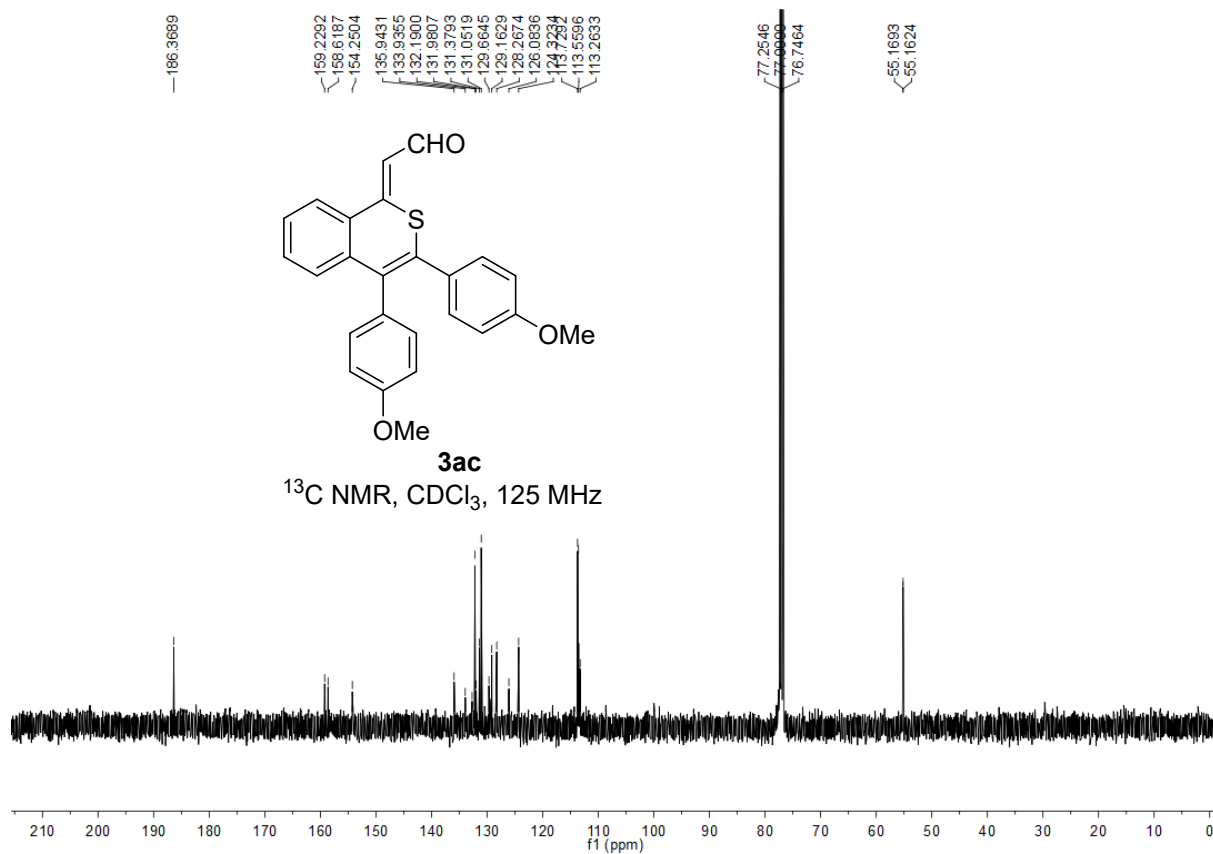

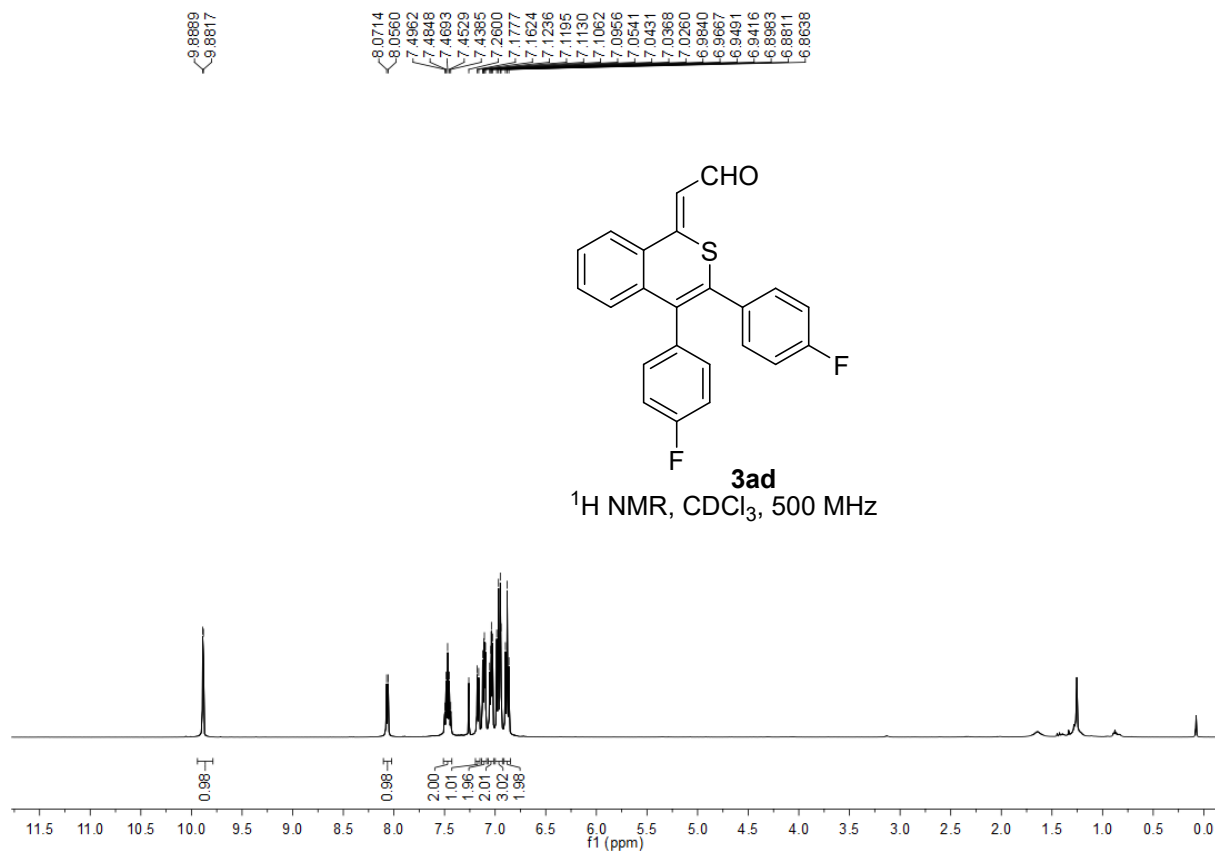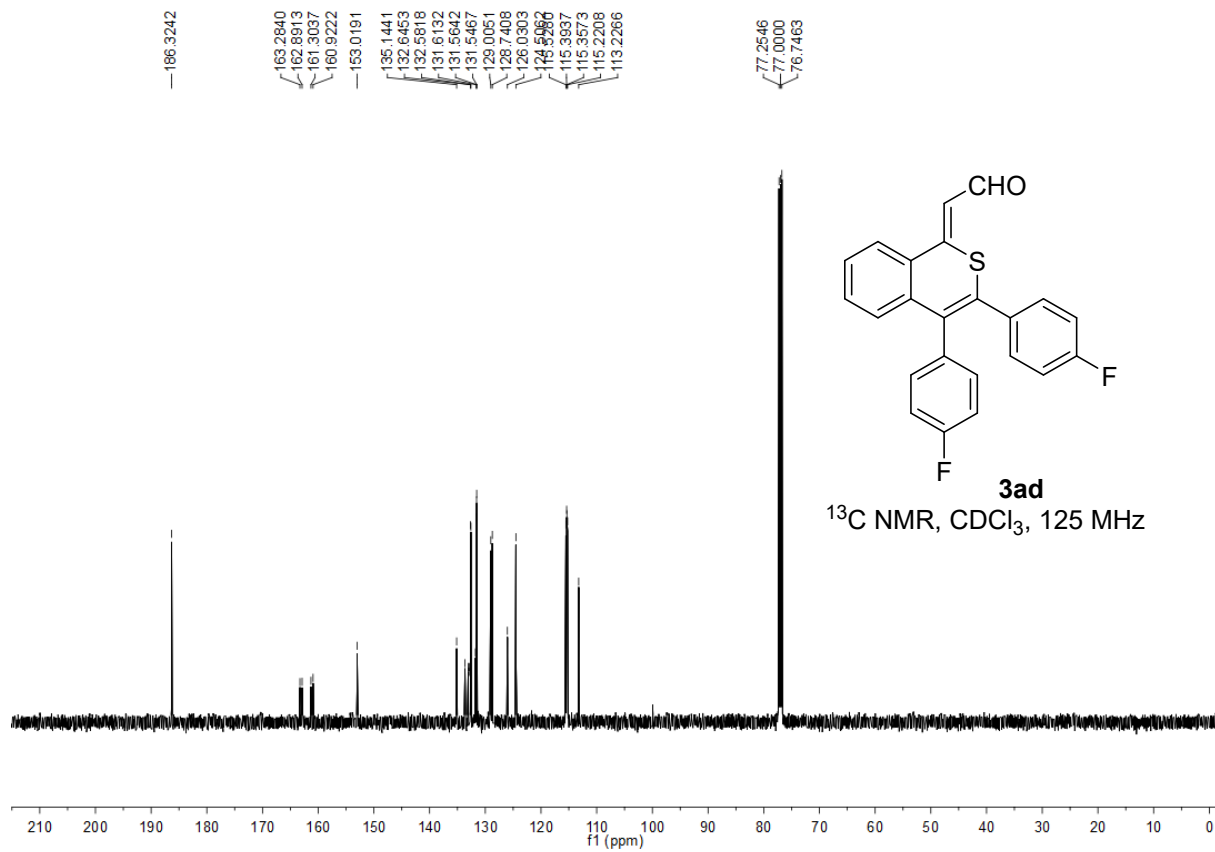

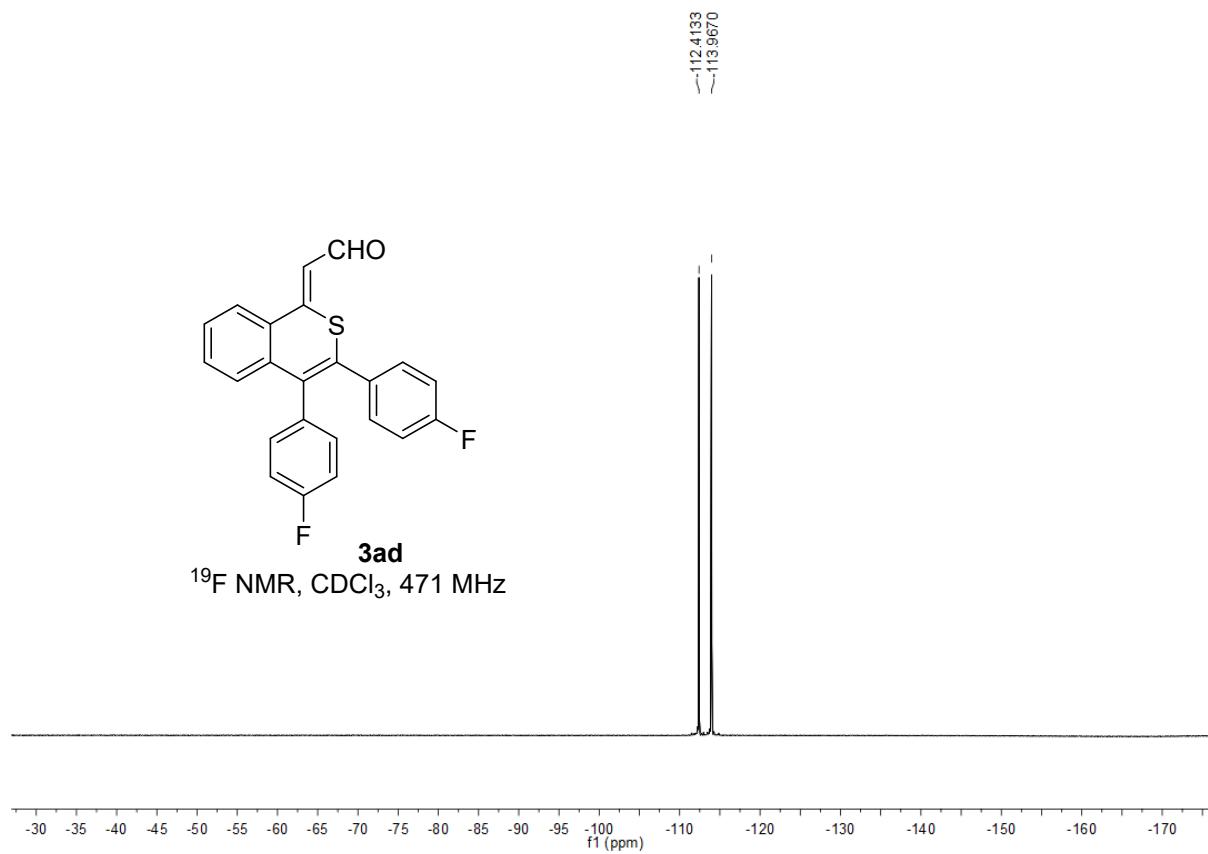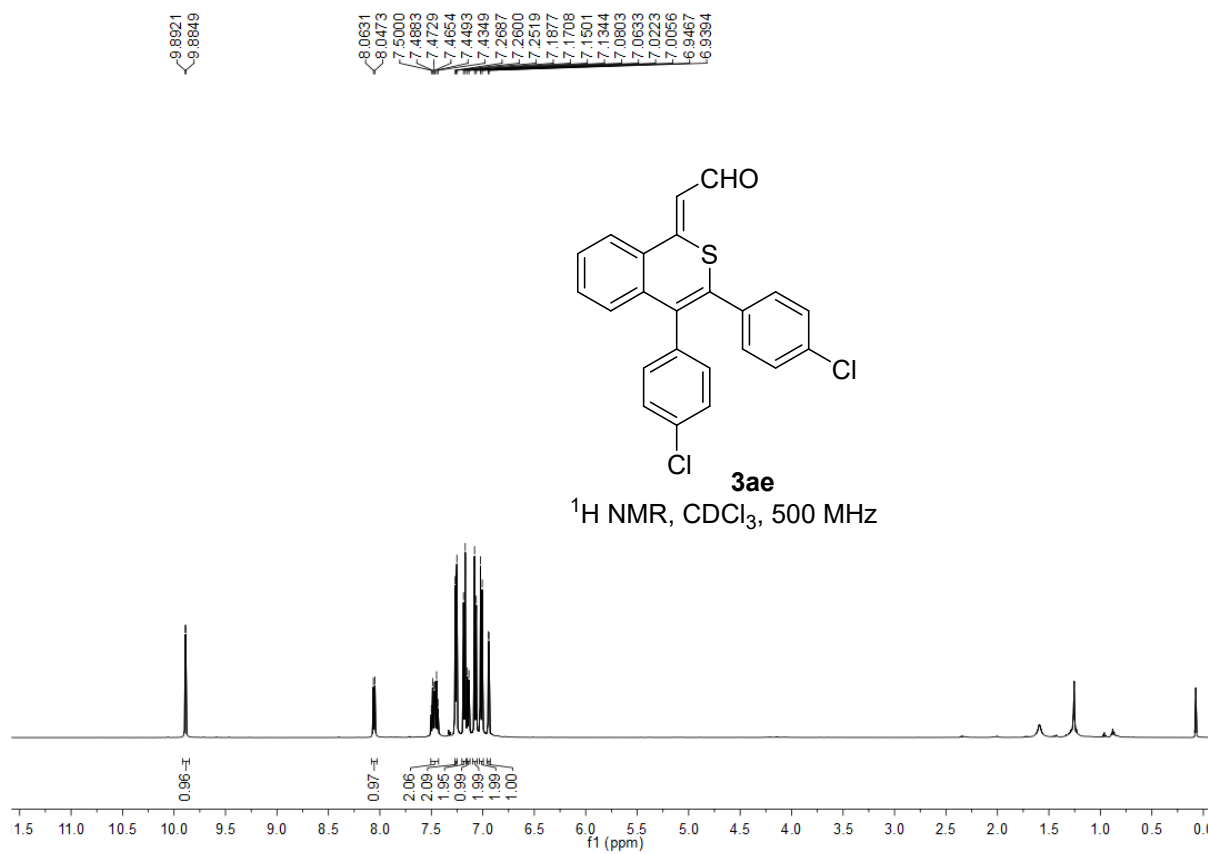

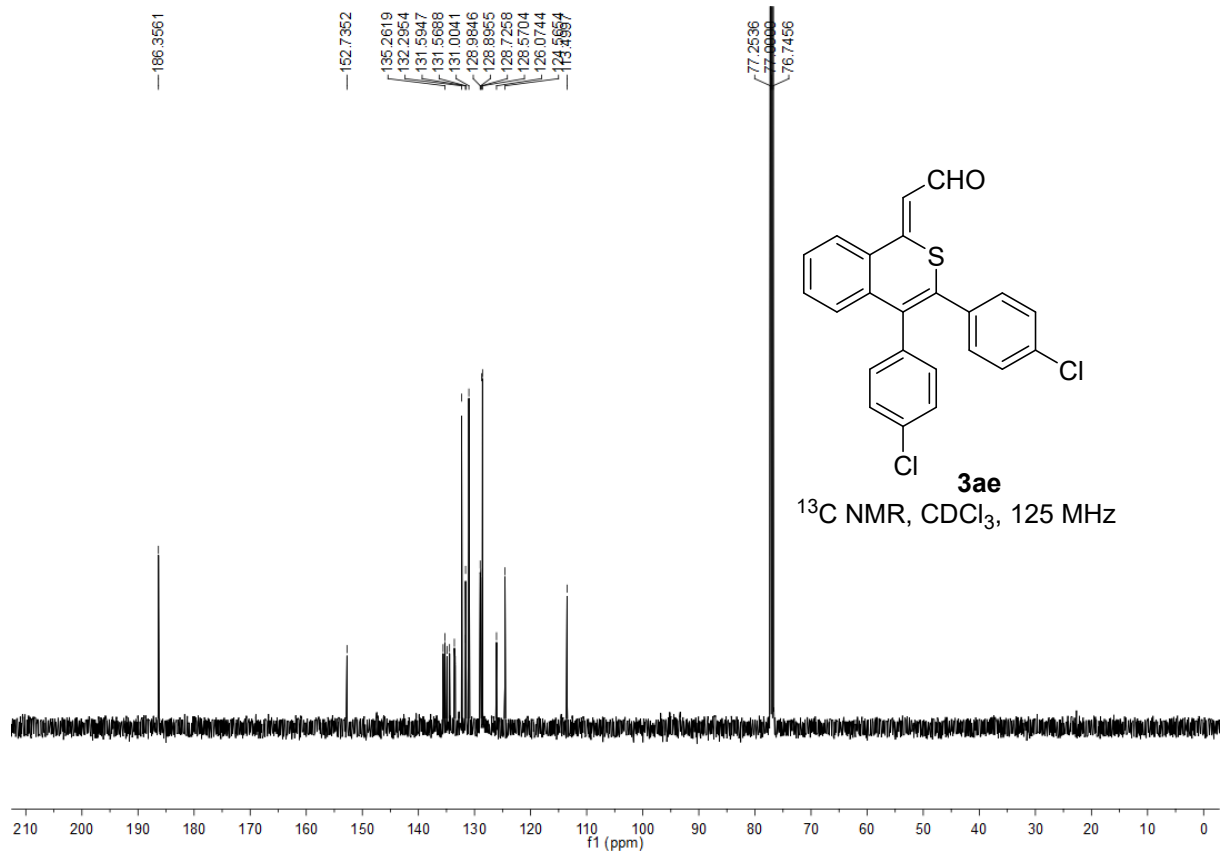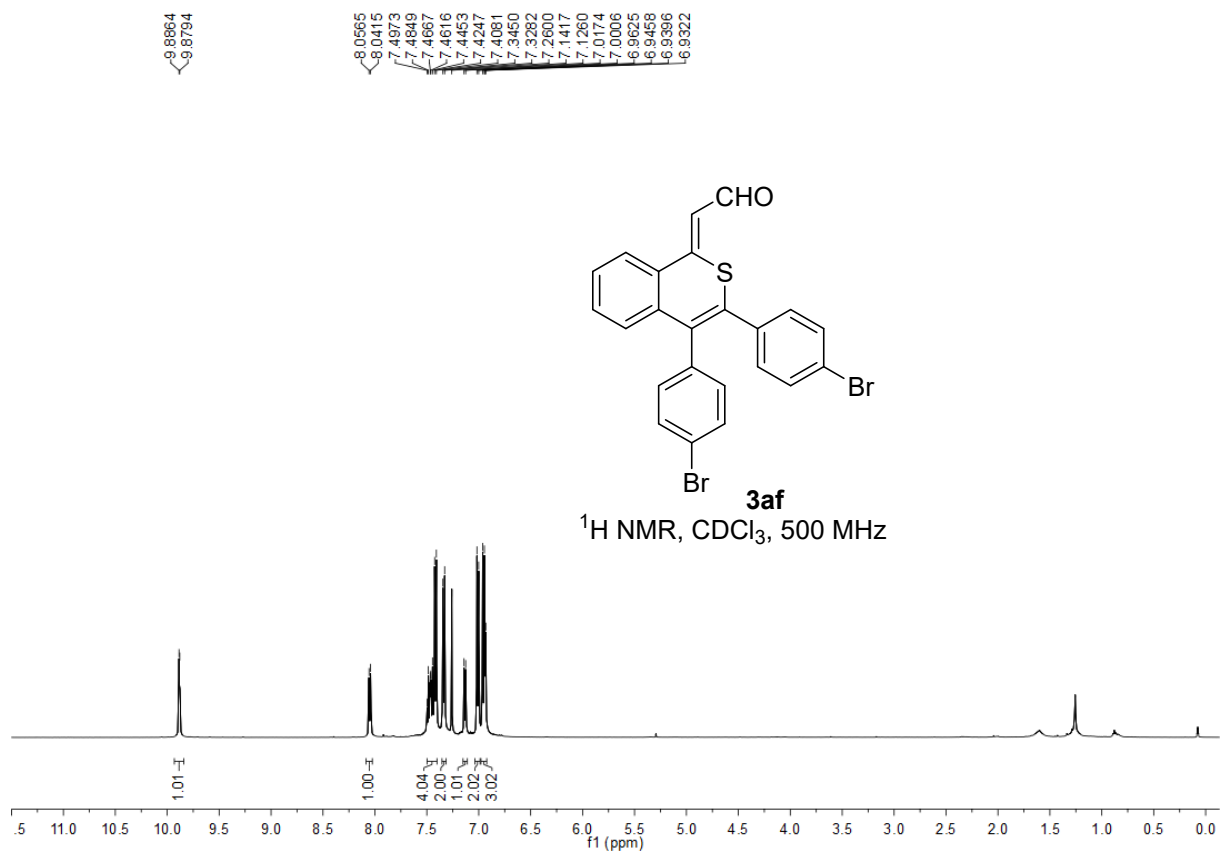



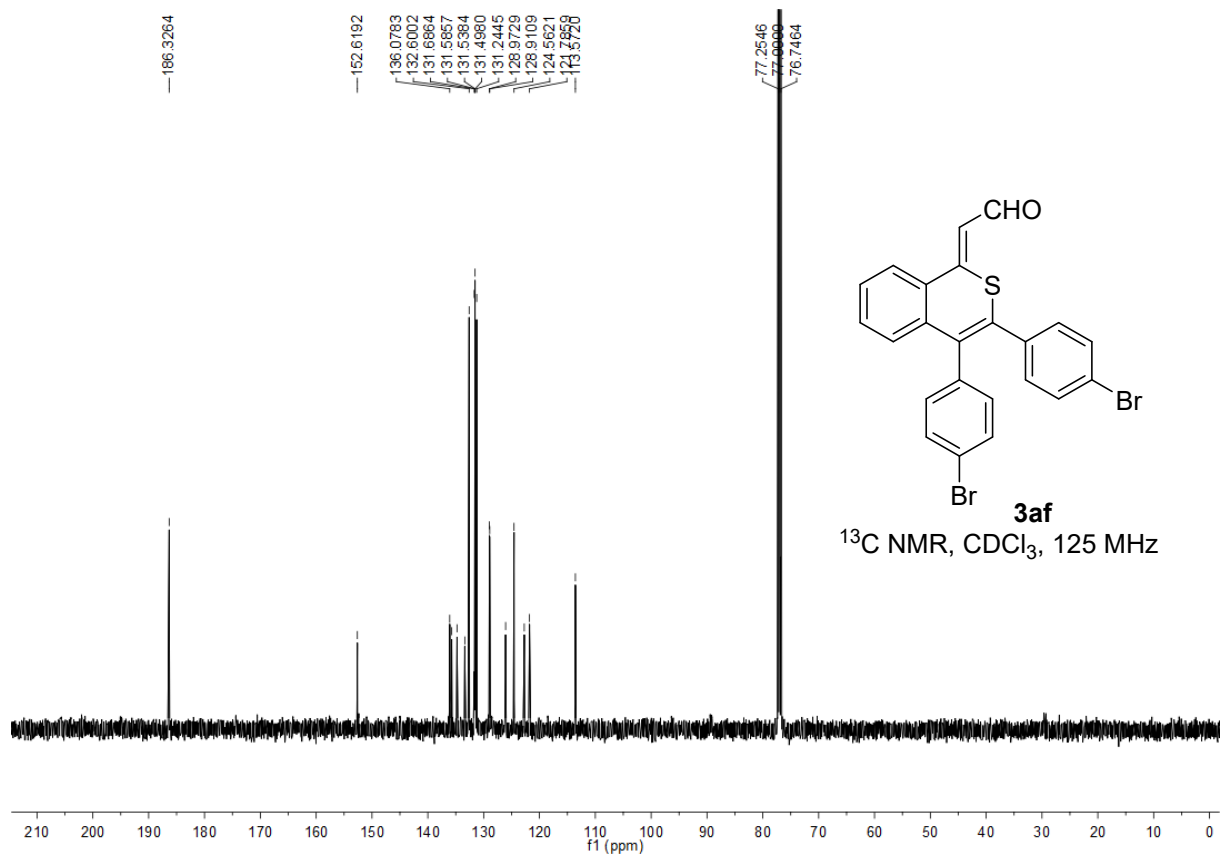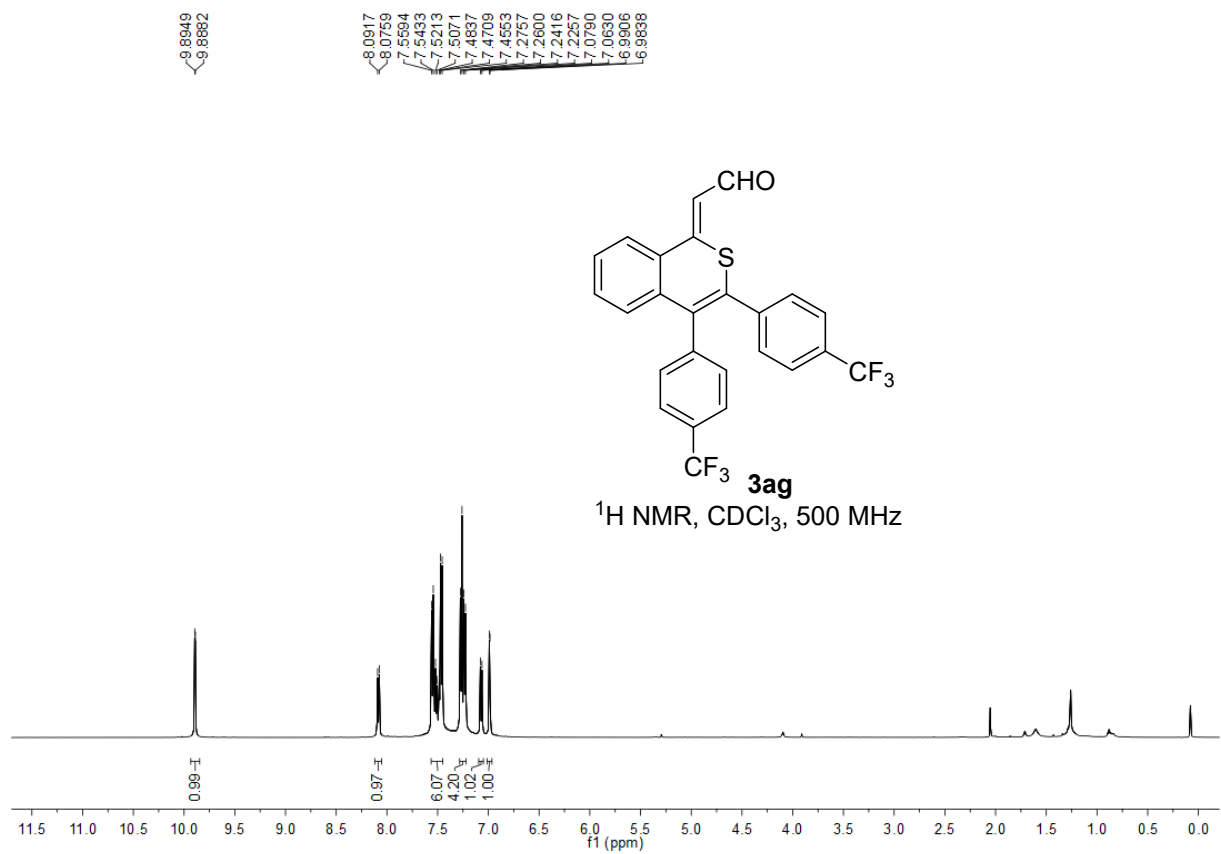

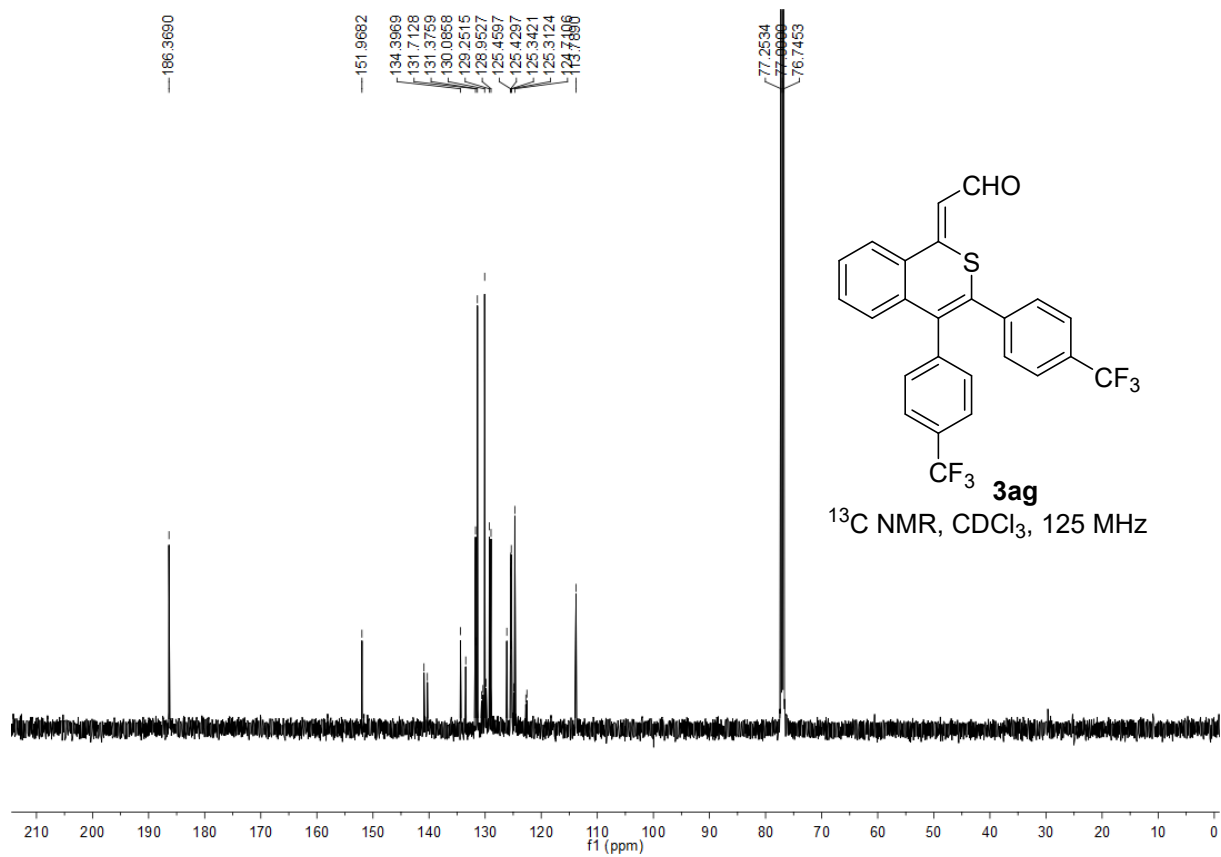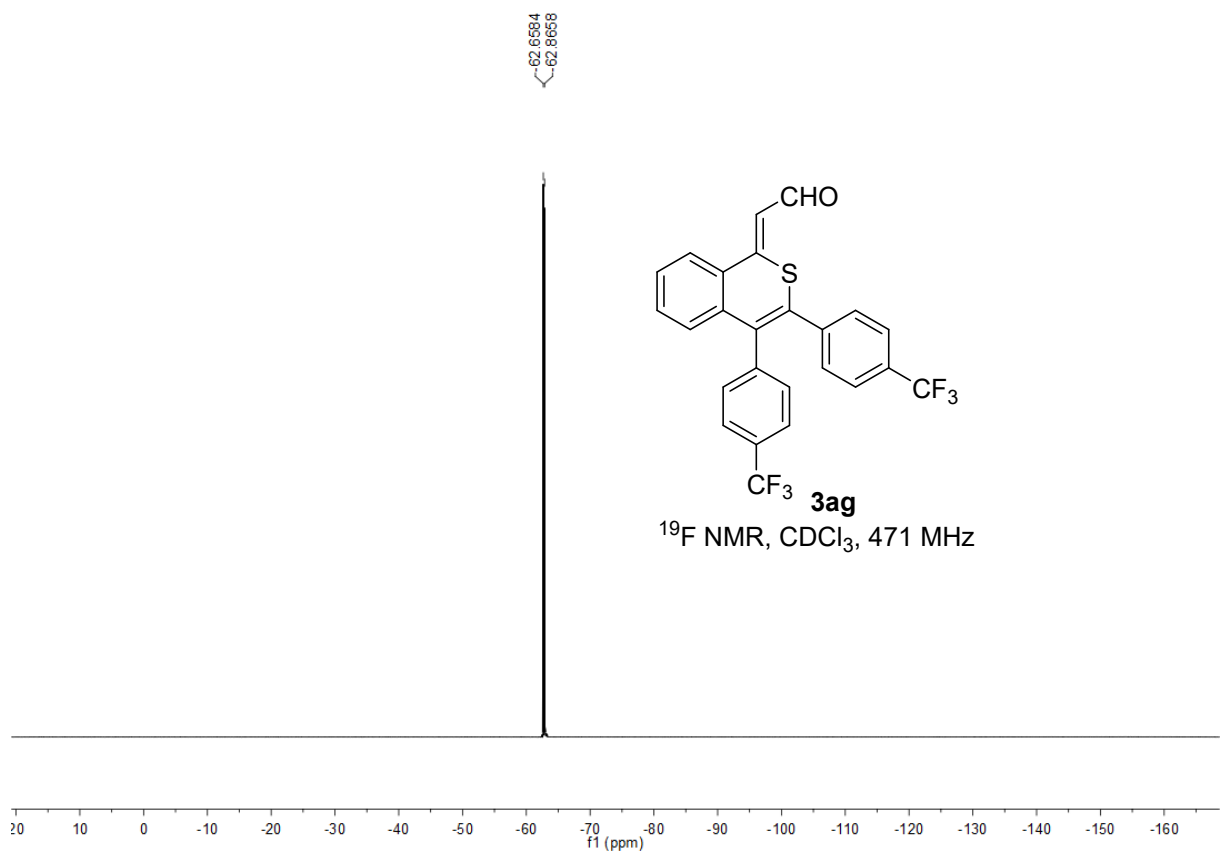

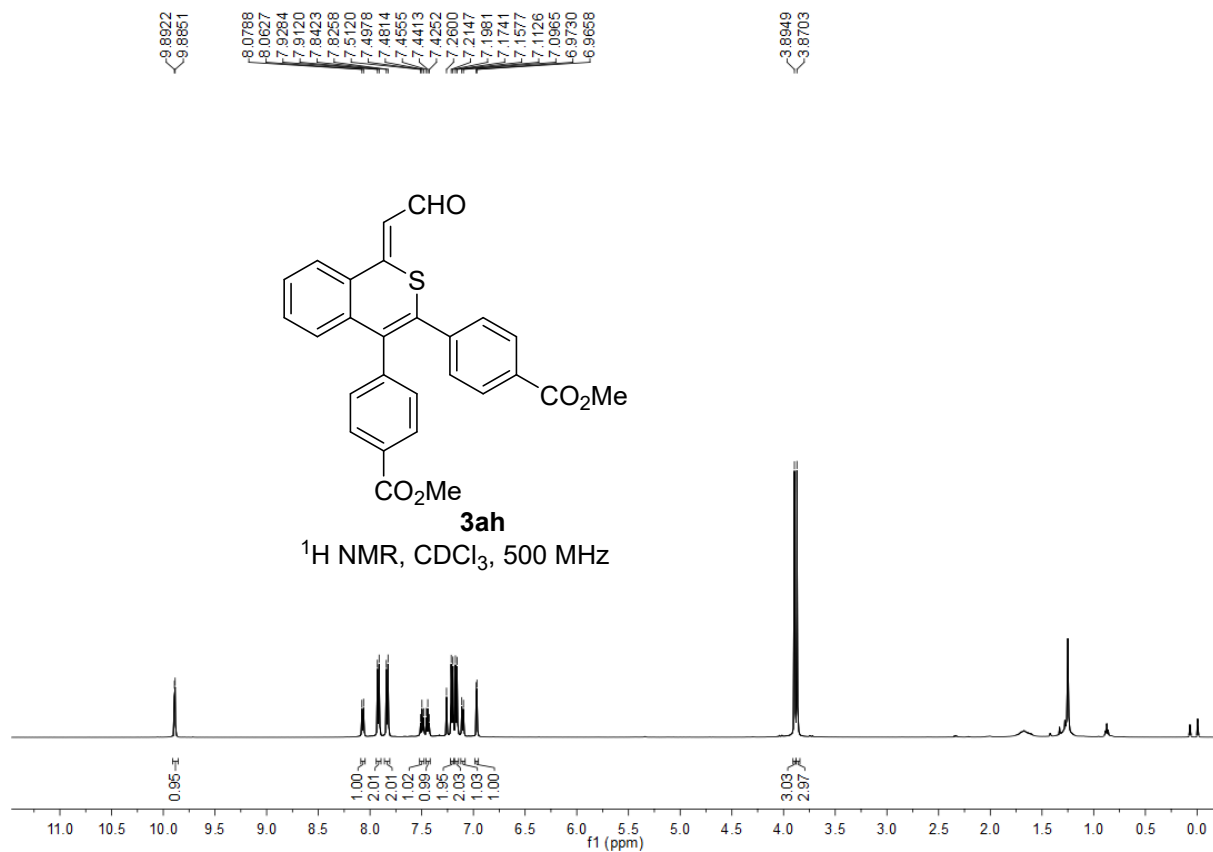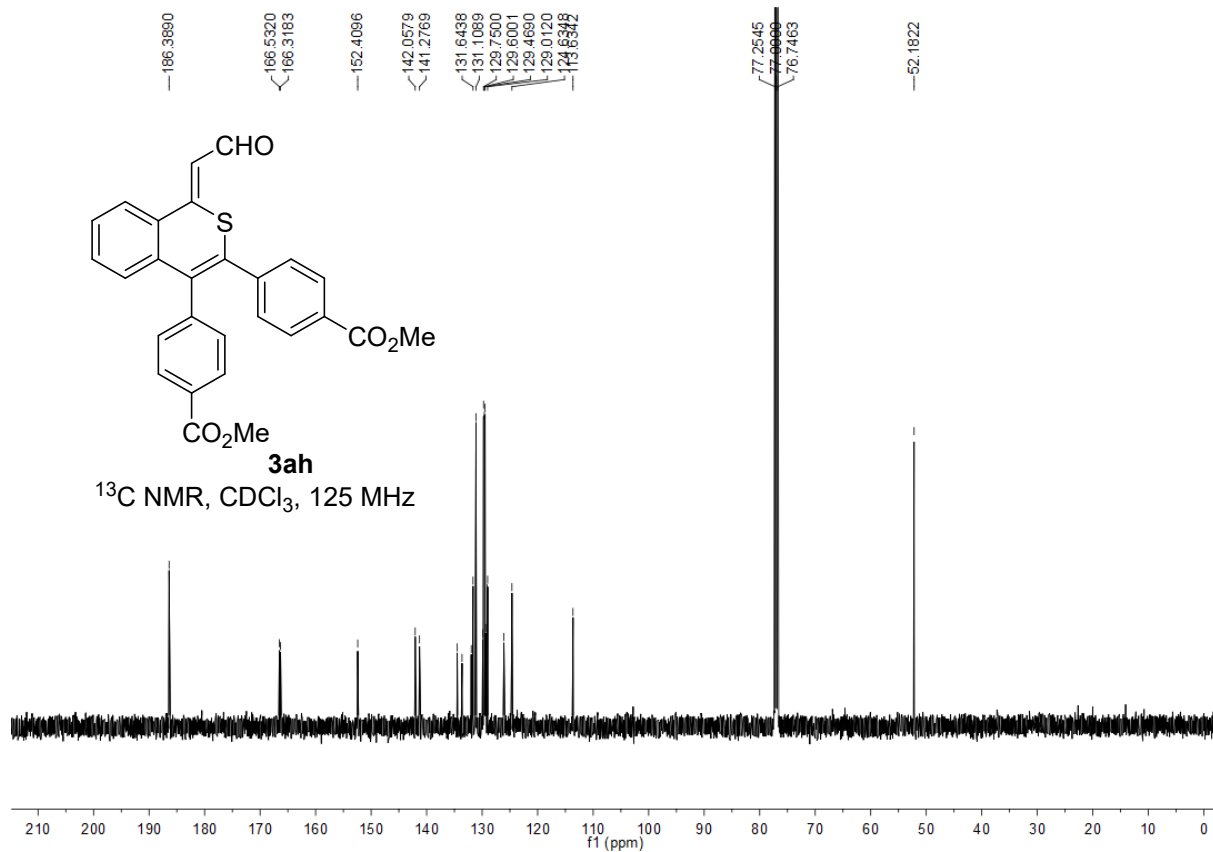

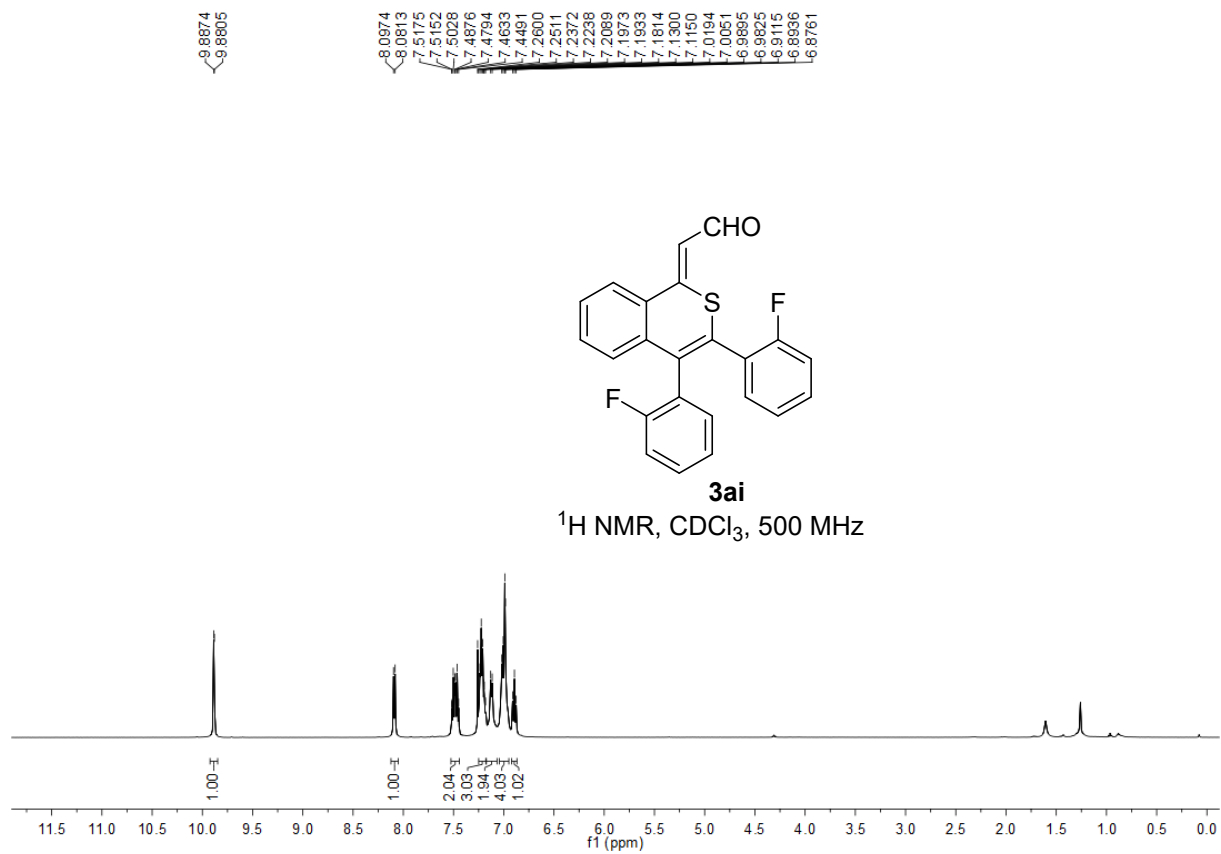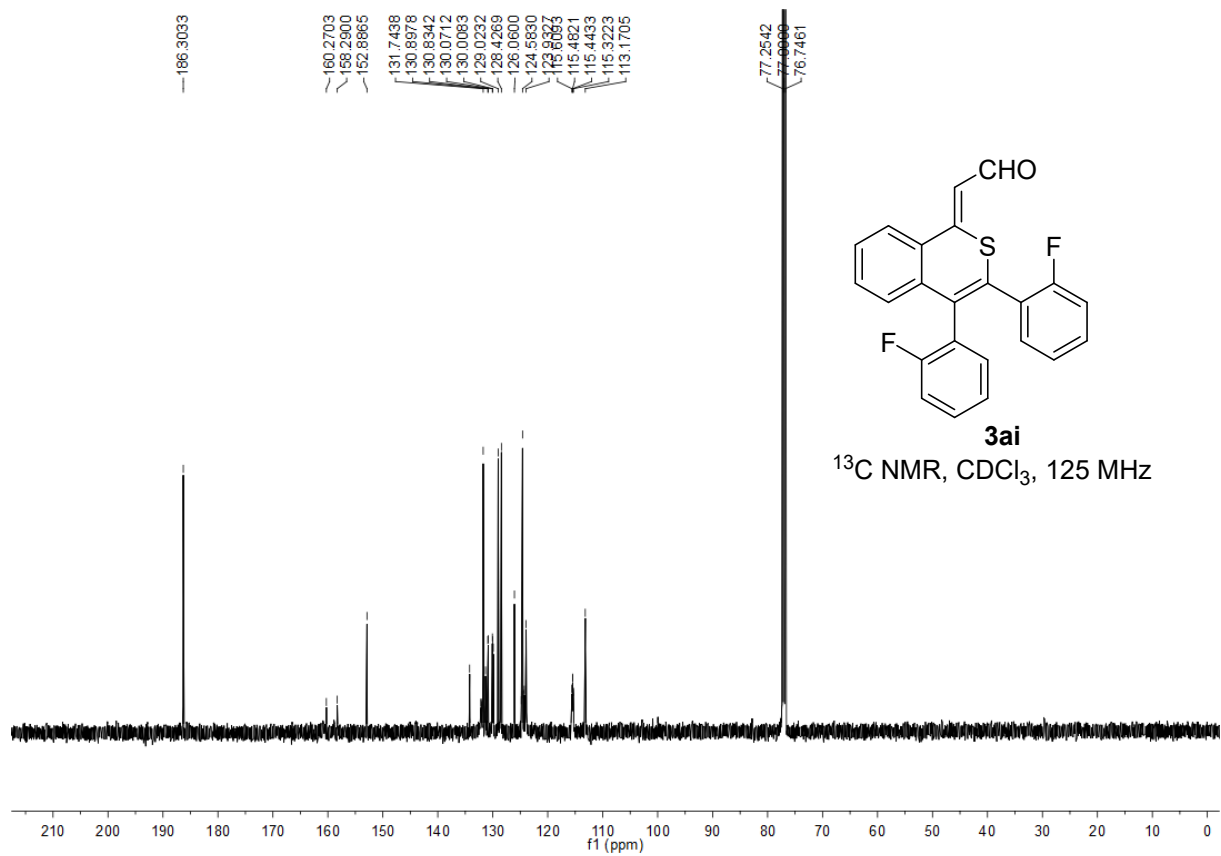

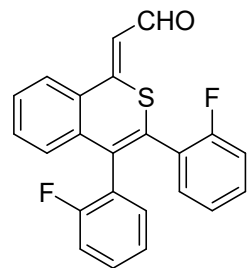

**3ai**  
<sup>19</sup>F NMR, CDCl<sub>3</sub>, 471 MHz

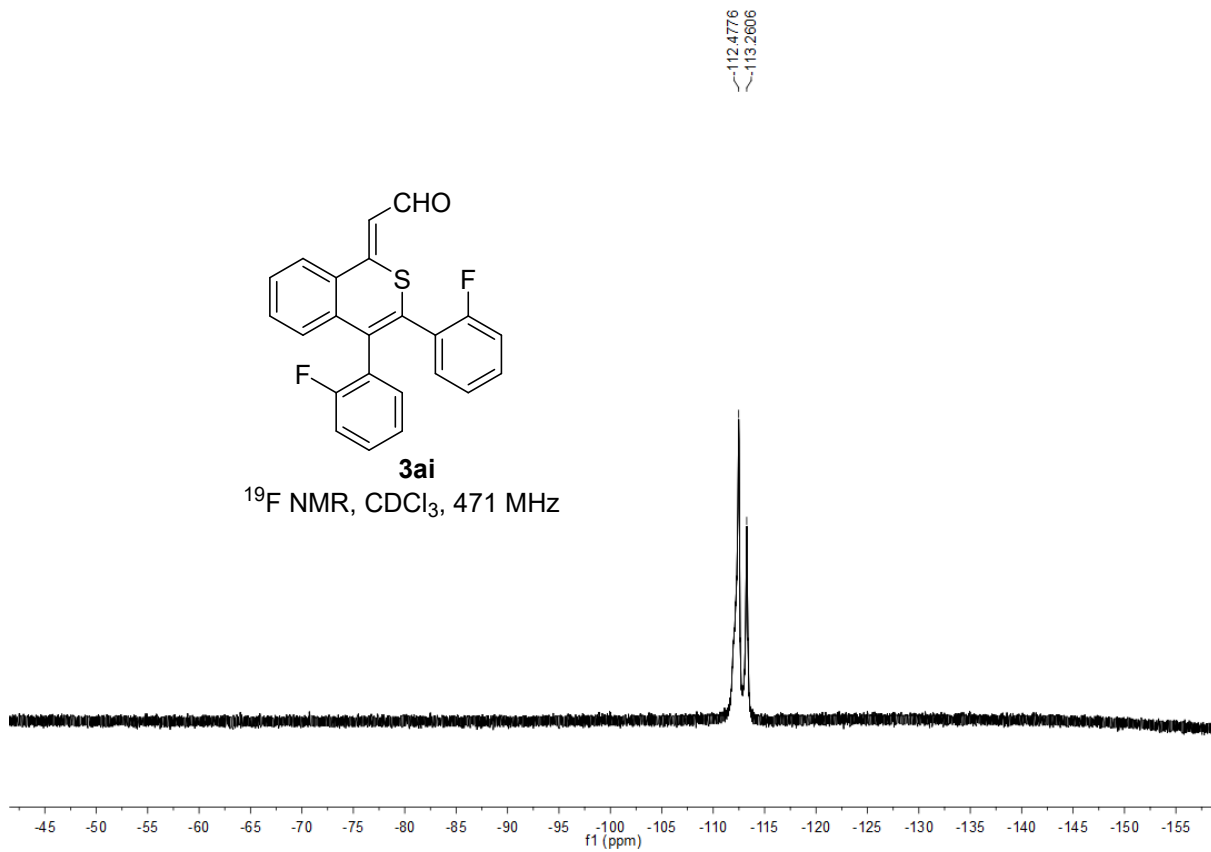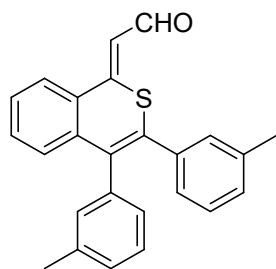

**3aj**  
<sup>1</sup>H NMR, CDCl<sub>3</sub>, 500 MHz

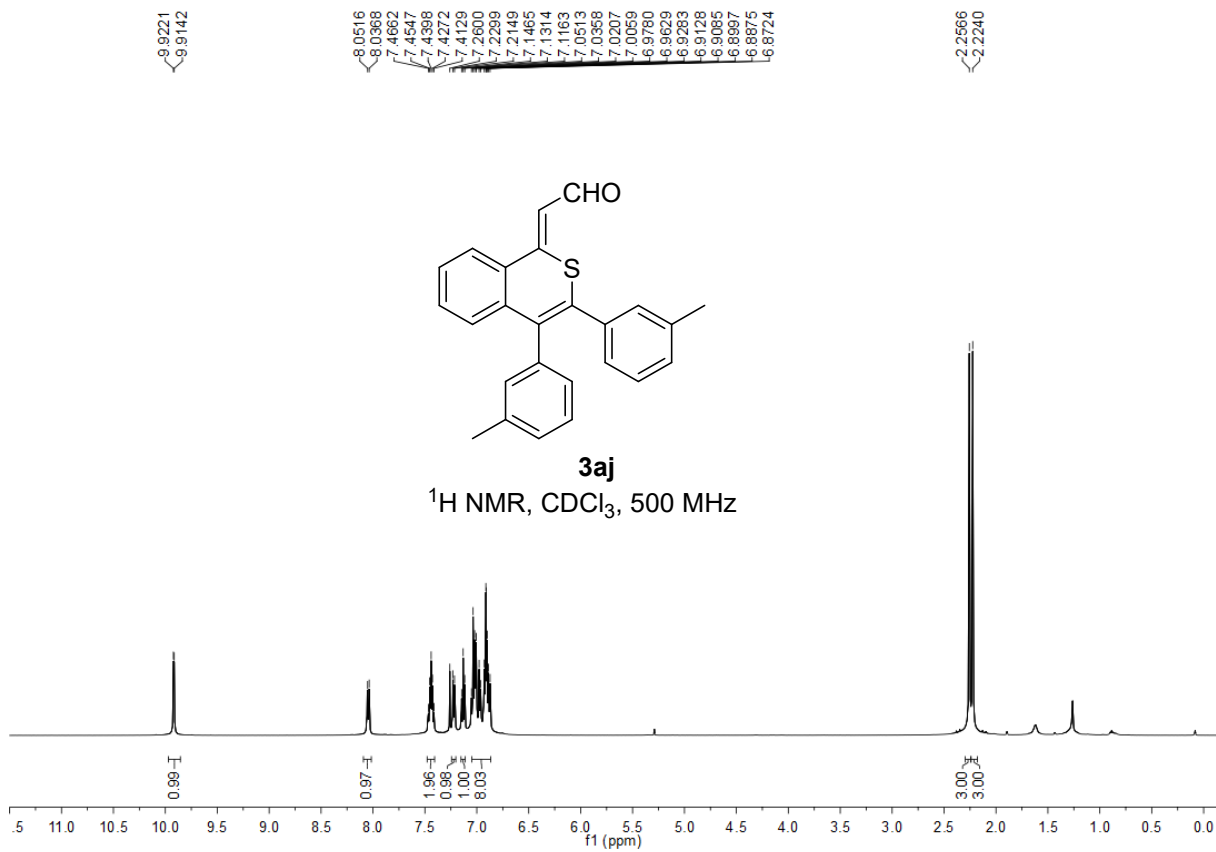

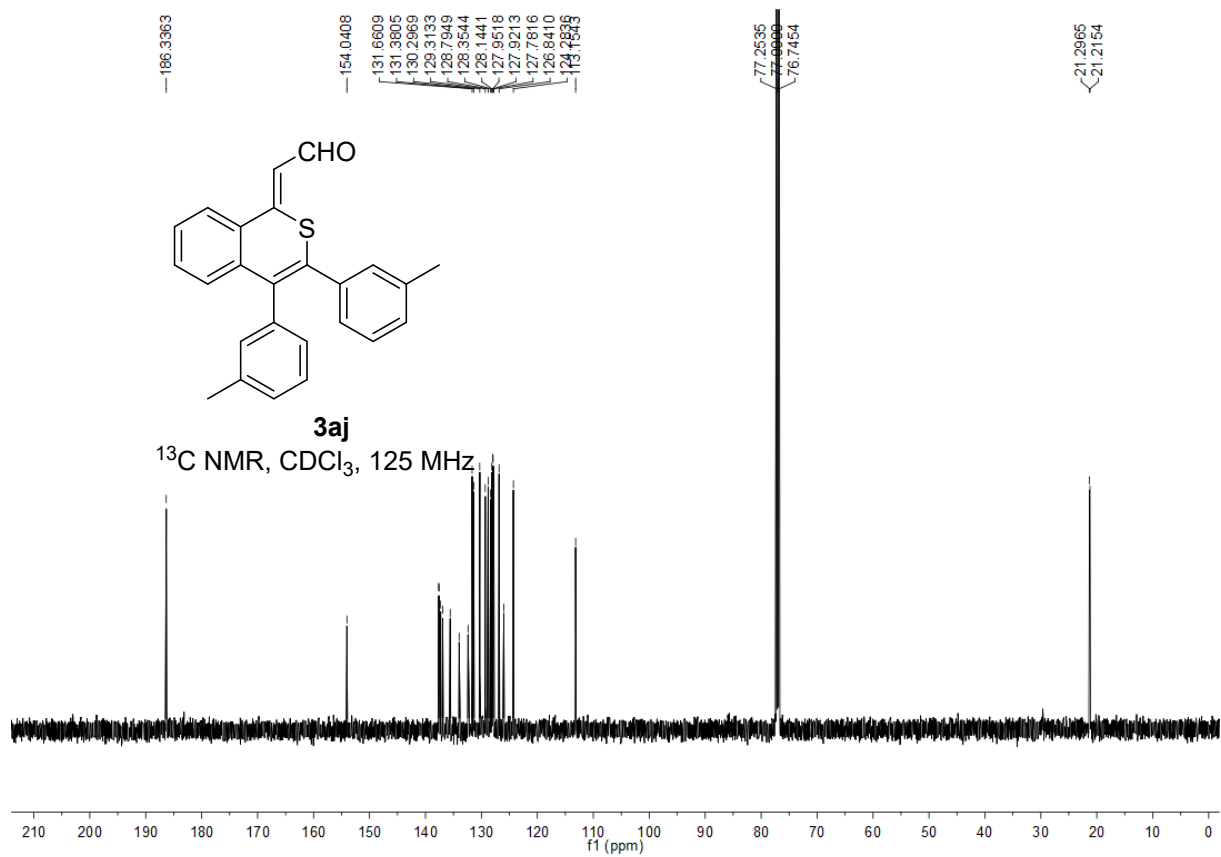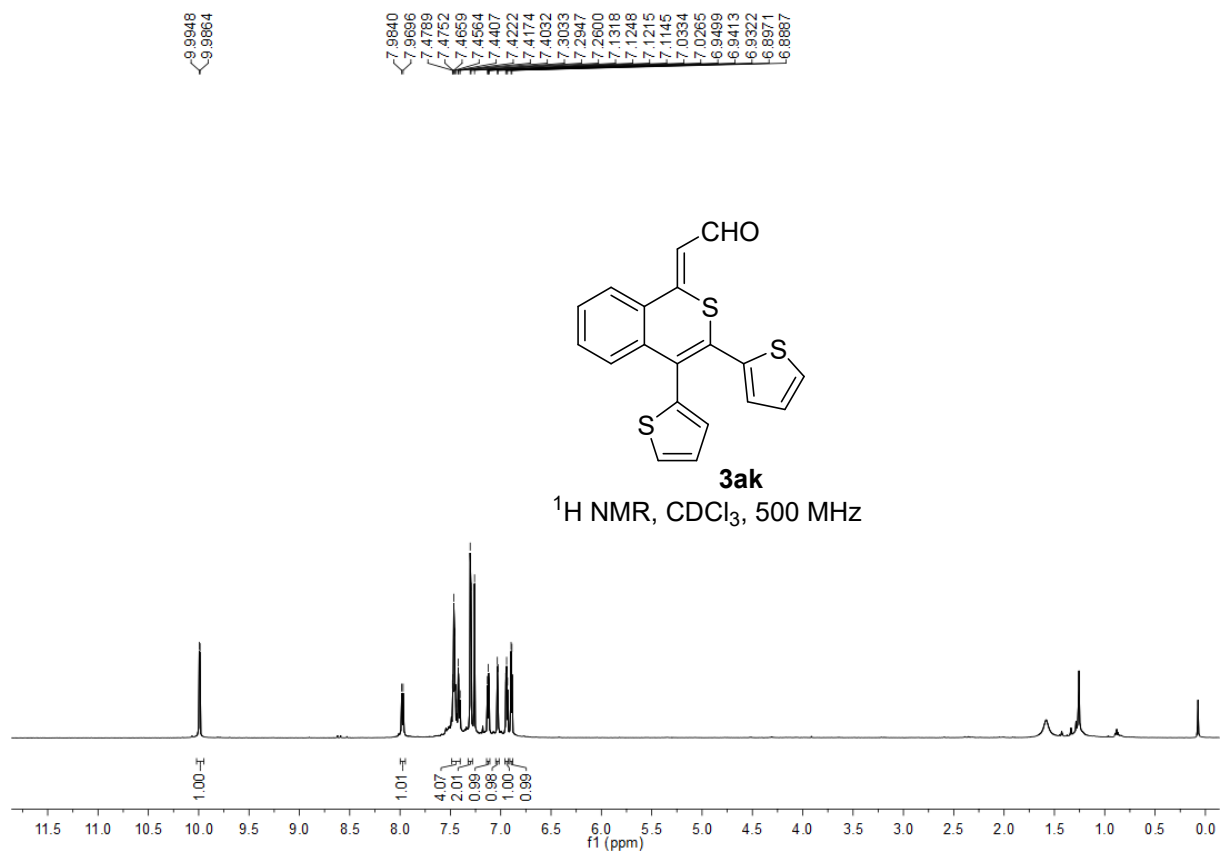

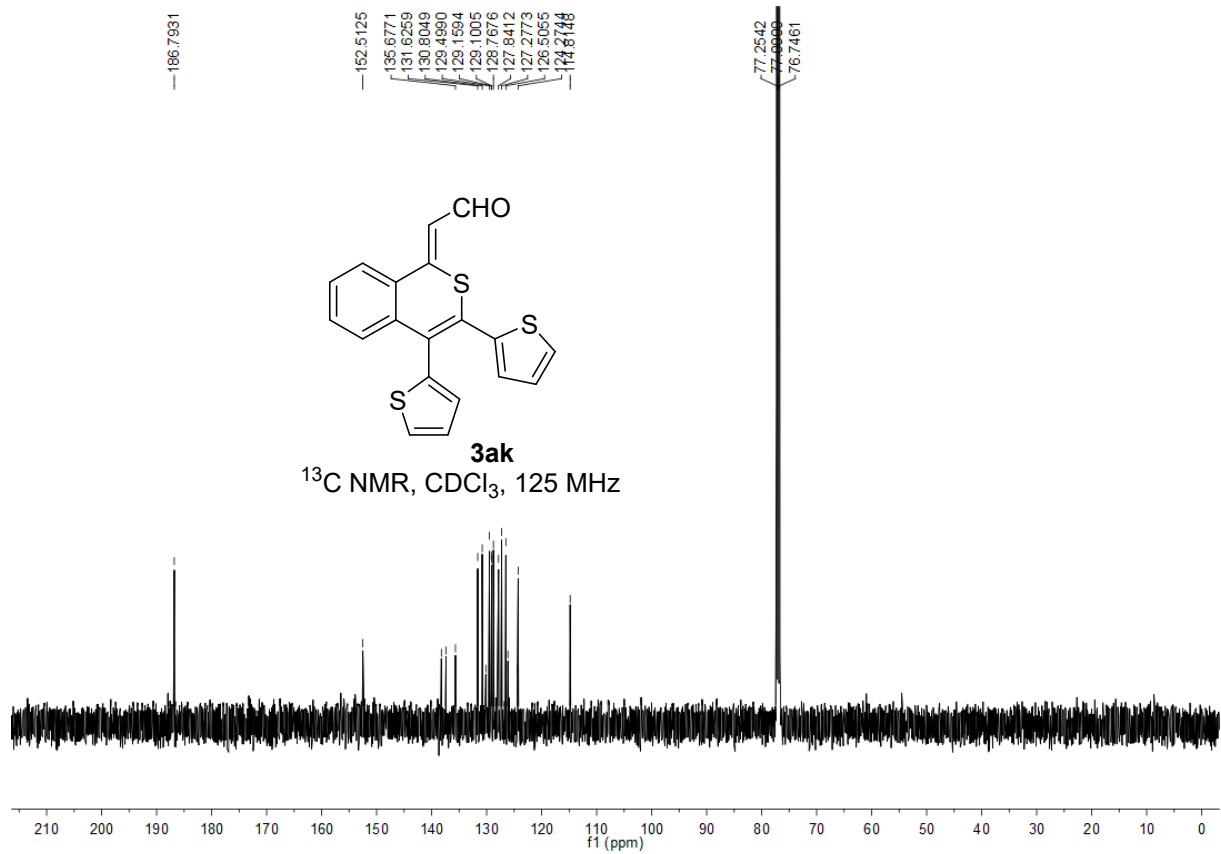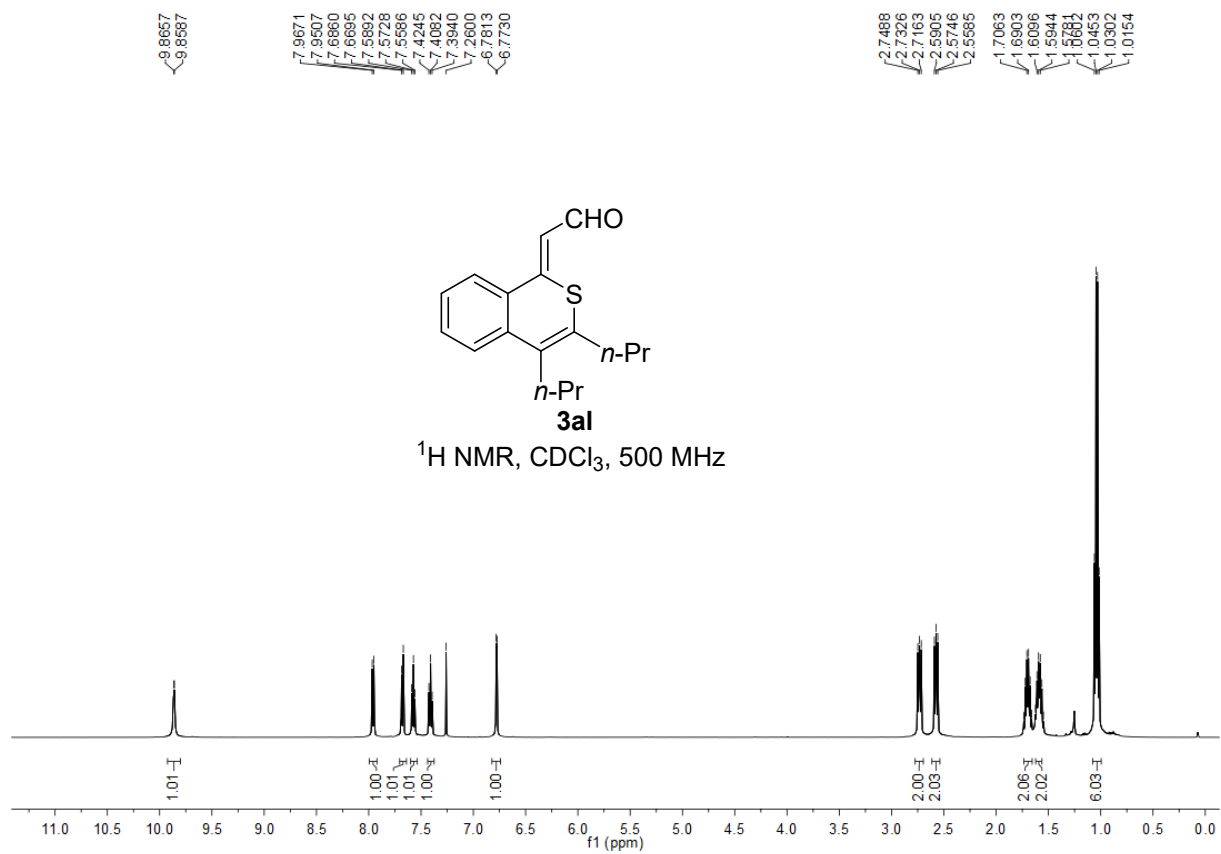

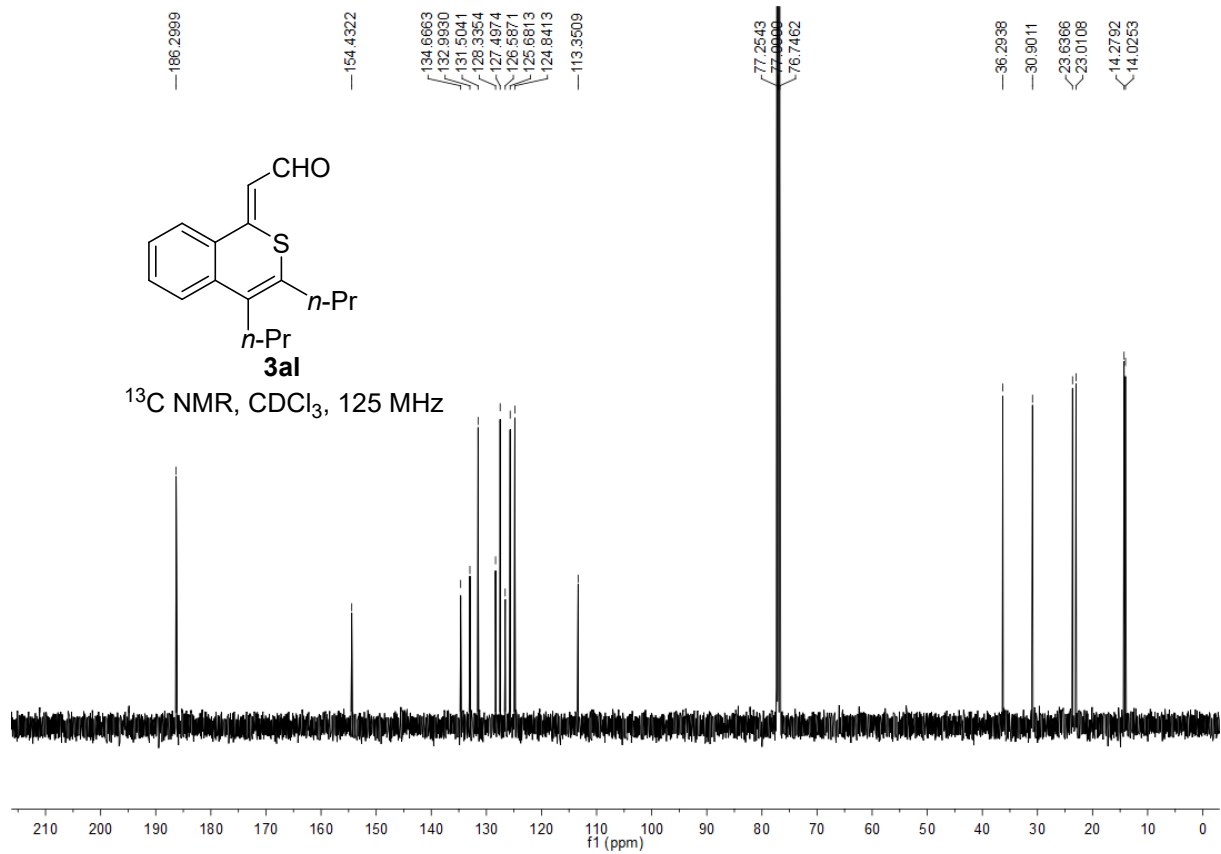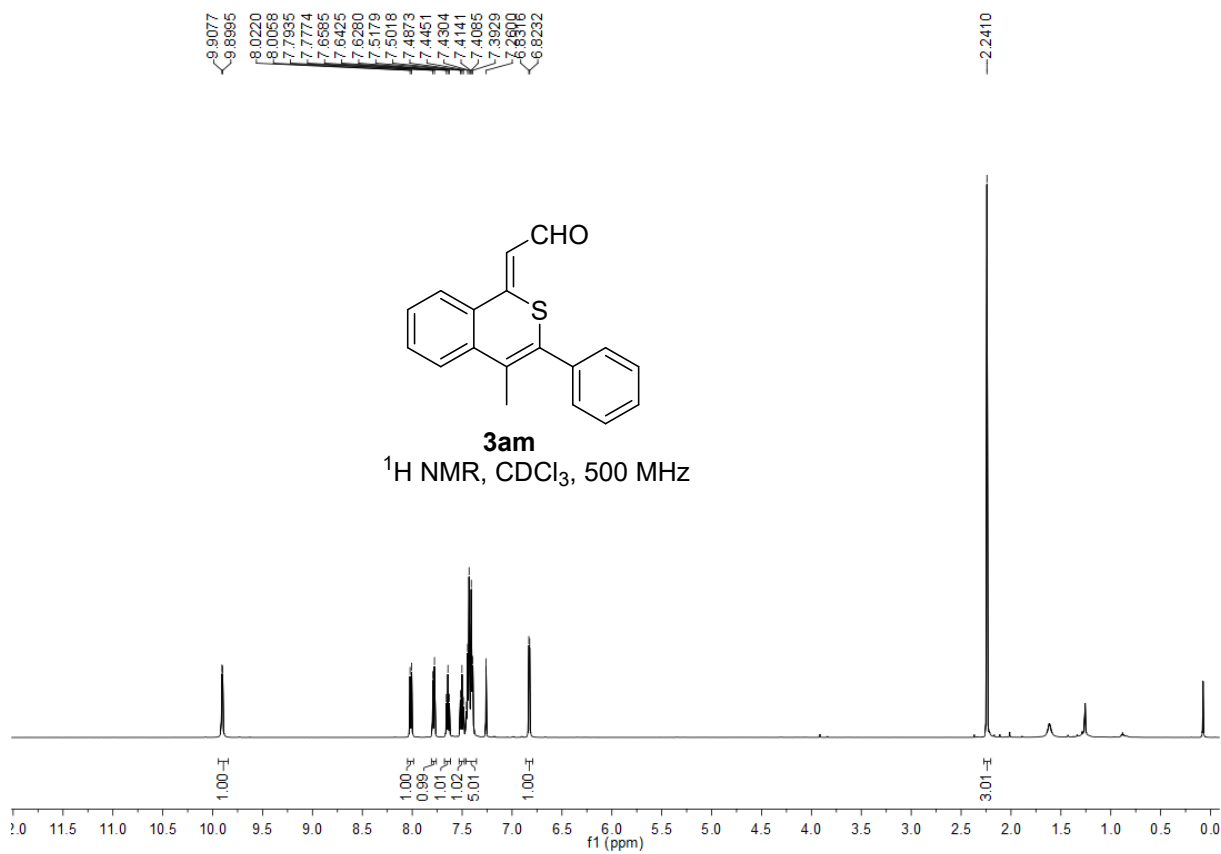



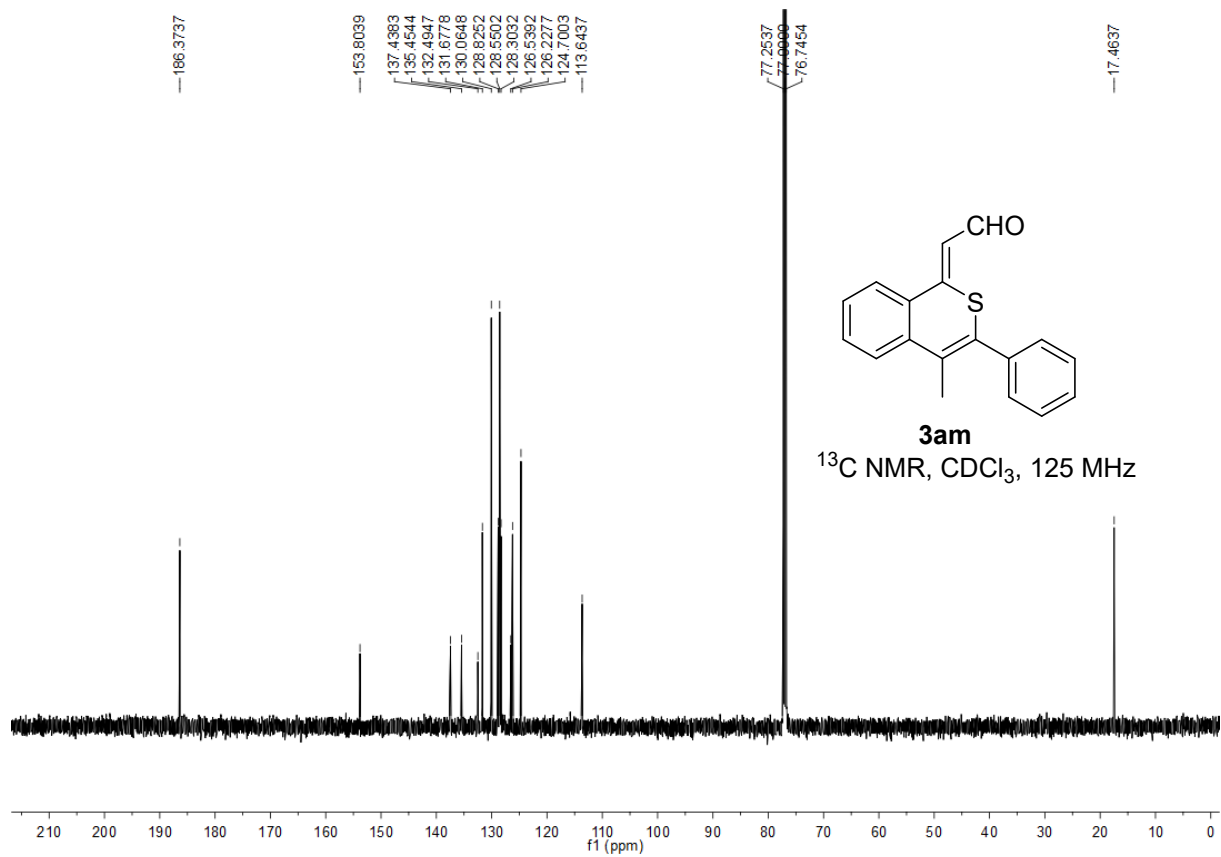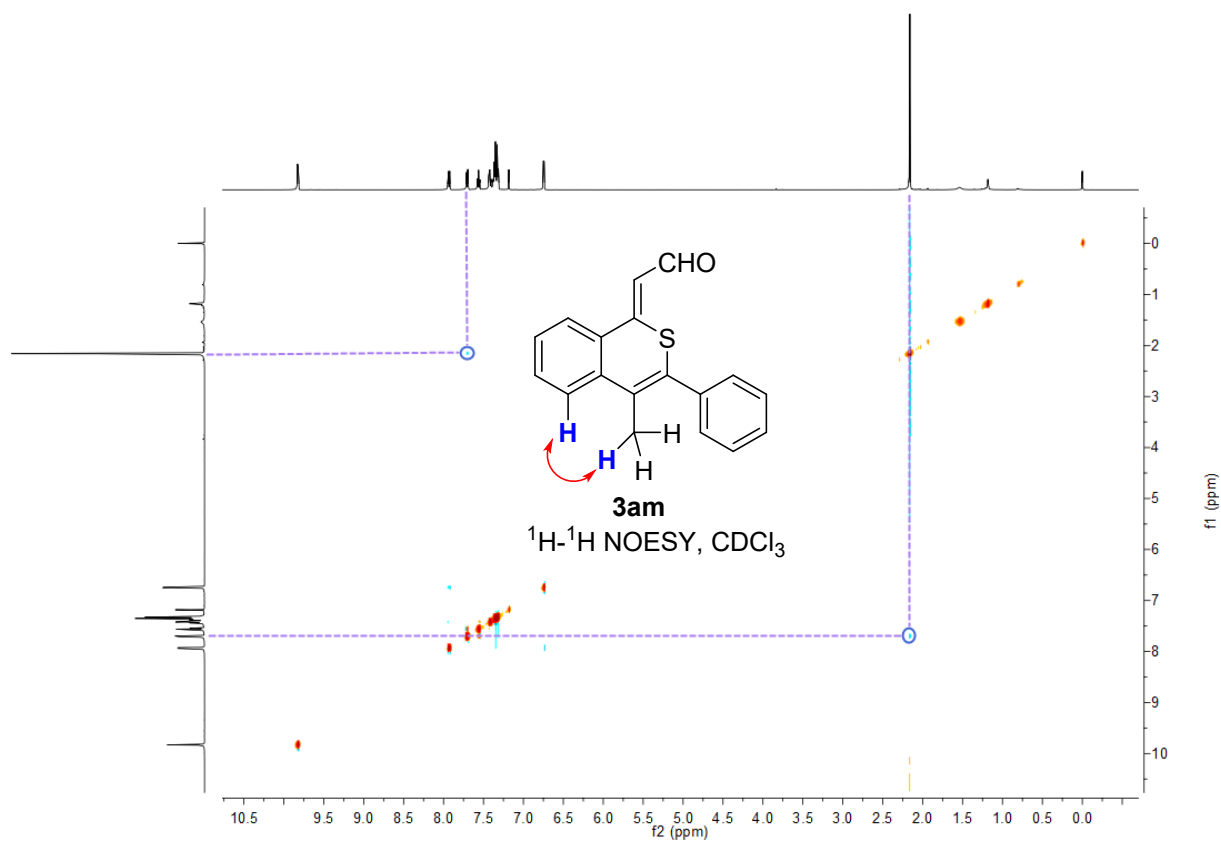

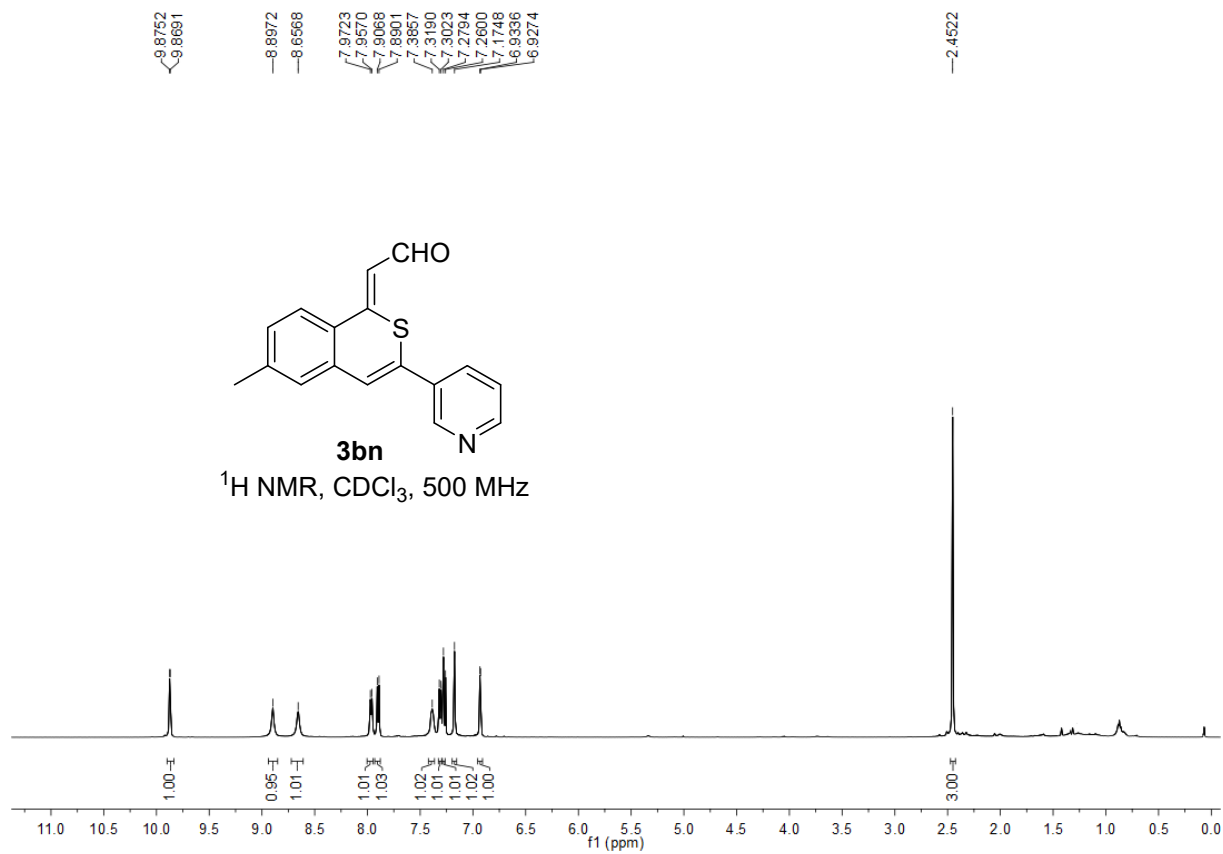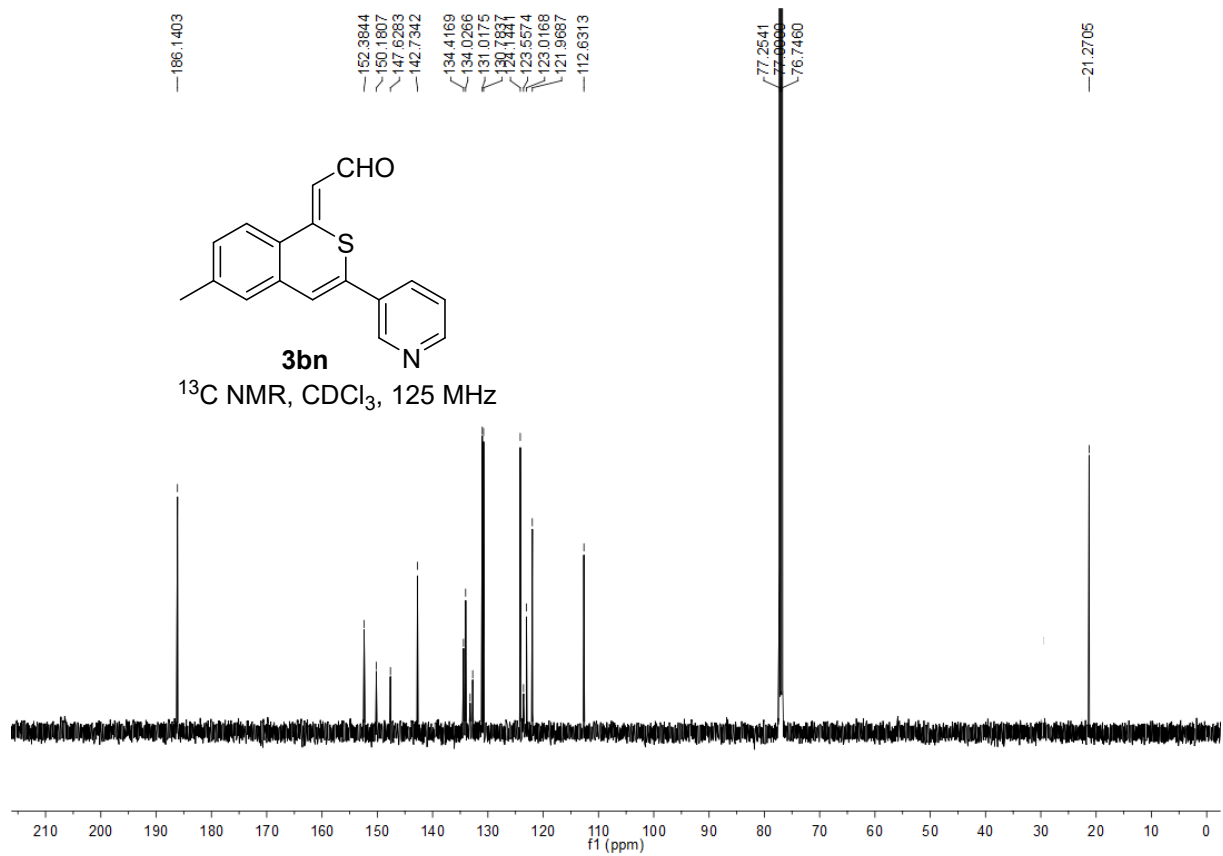

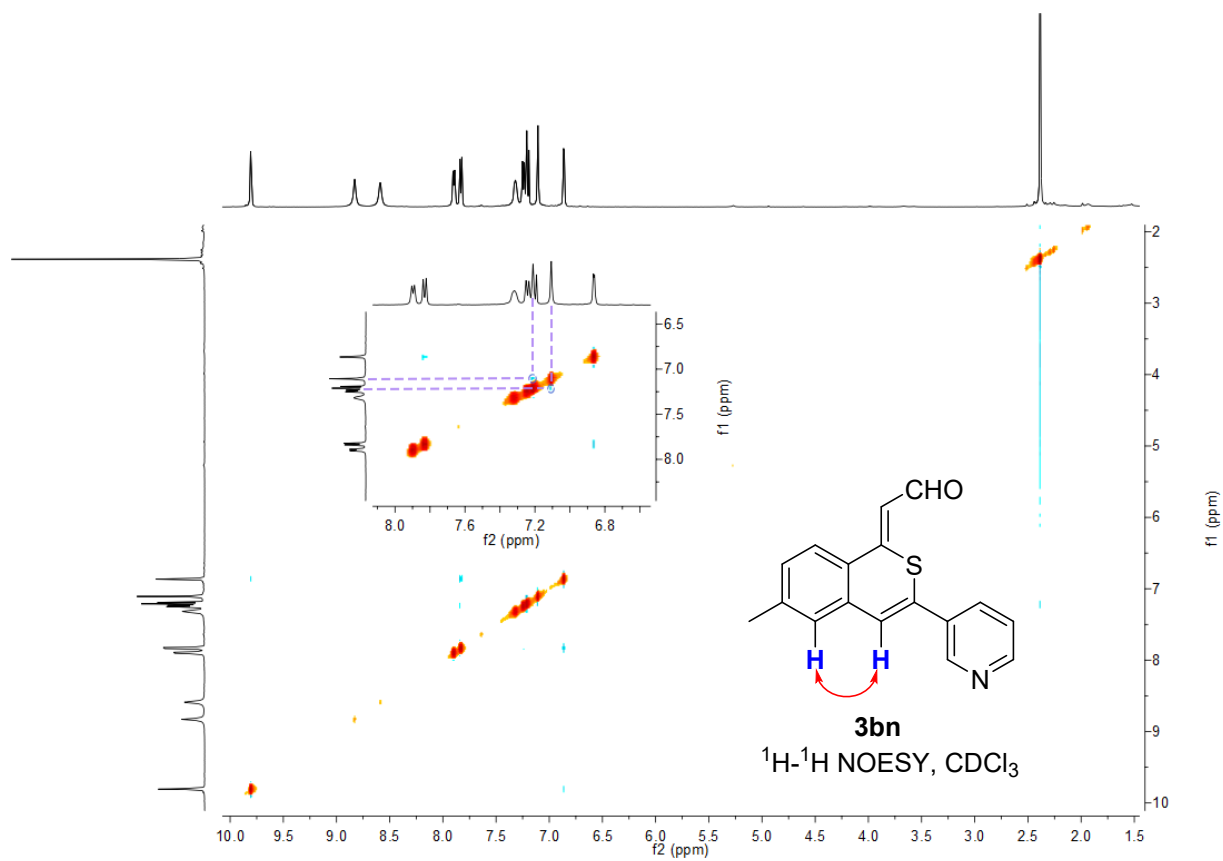

9.9919  
 9.9836  
 9.9160  
 9.9082  
 8.0346  
 8.0160  
 7.9985  
 7.4955  
 7.4914  
 7.4839  
 7.4768  
 7.4719  
 7.4446  
 7.4404  
 7.4255  
 7.4148  
 7.4111  
 7.4062  
 7.4015  
 7.2600  
 7.2480  
 7.2421  
 7.2397  
 7.2287  
 7.2211  
 7.2139  
 7.2085  
 7.2039  
 7.1966  
 7.1826  
 7.1670  
 7.1637  
 7.1457  
 7.1383  
 6.9346  
 6.9276  
 6.9242  
 6.9175  
 6.9099  
 6.9064  
 6.8979  
 6.8772  
 6.8698  
 6.8671  
 6.8596  
 6.8222  
 6.8130

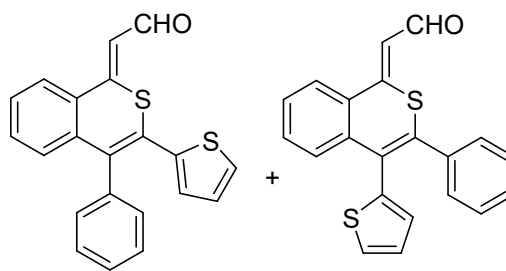

**3ao/3ao' = 1:1**

$^1\text{H}$  NMR,  $\text{CDCl}_3$ , 500 MHz

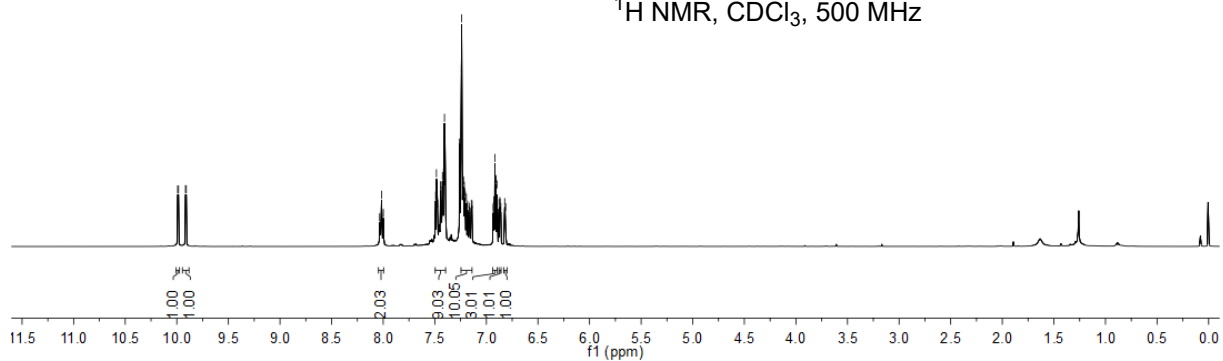

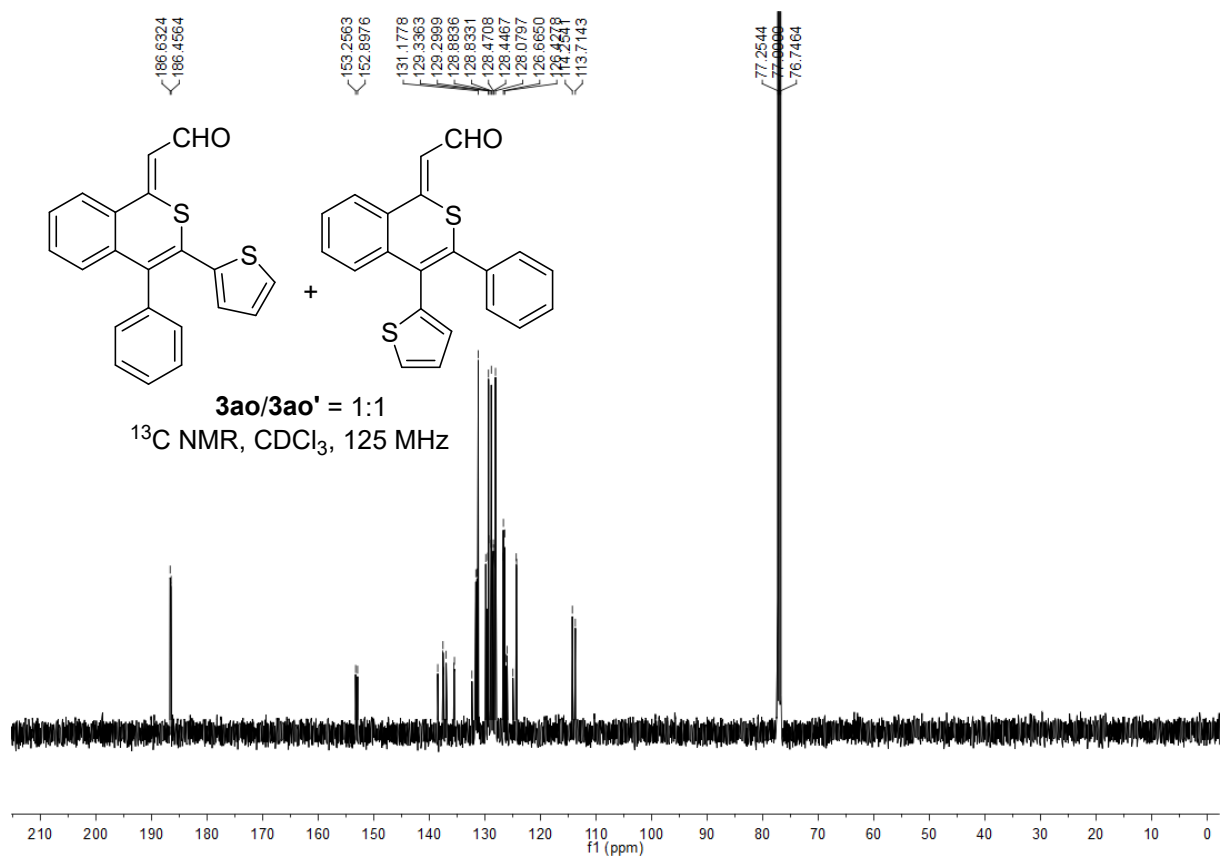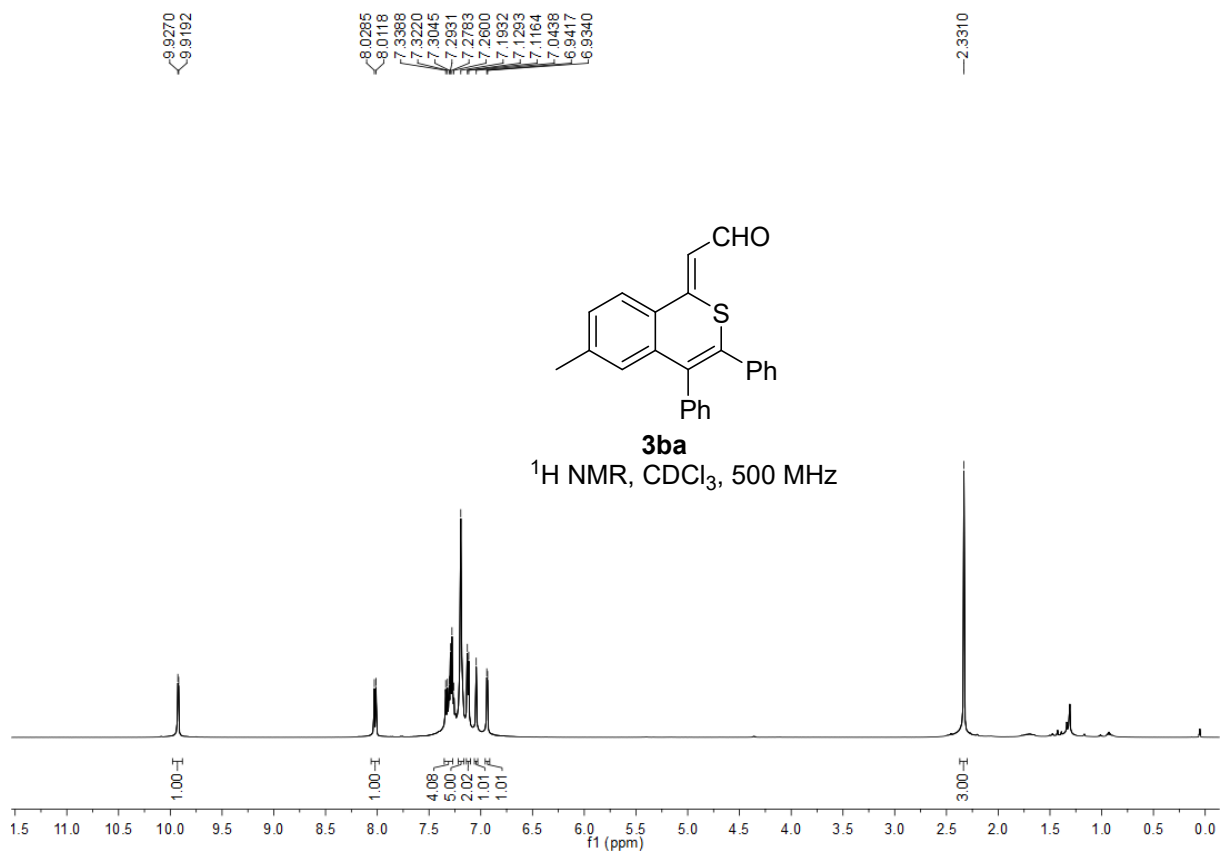

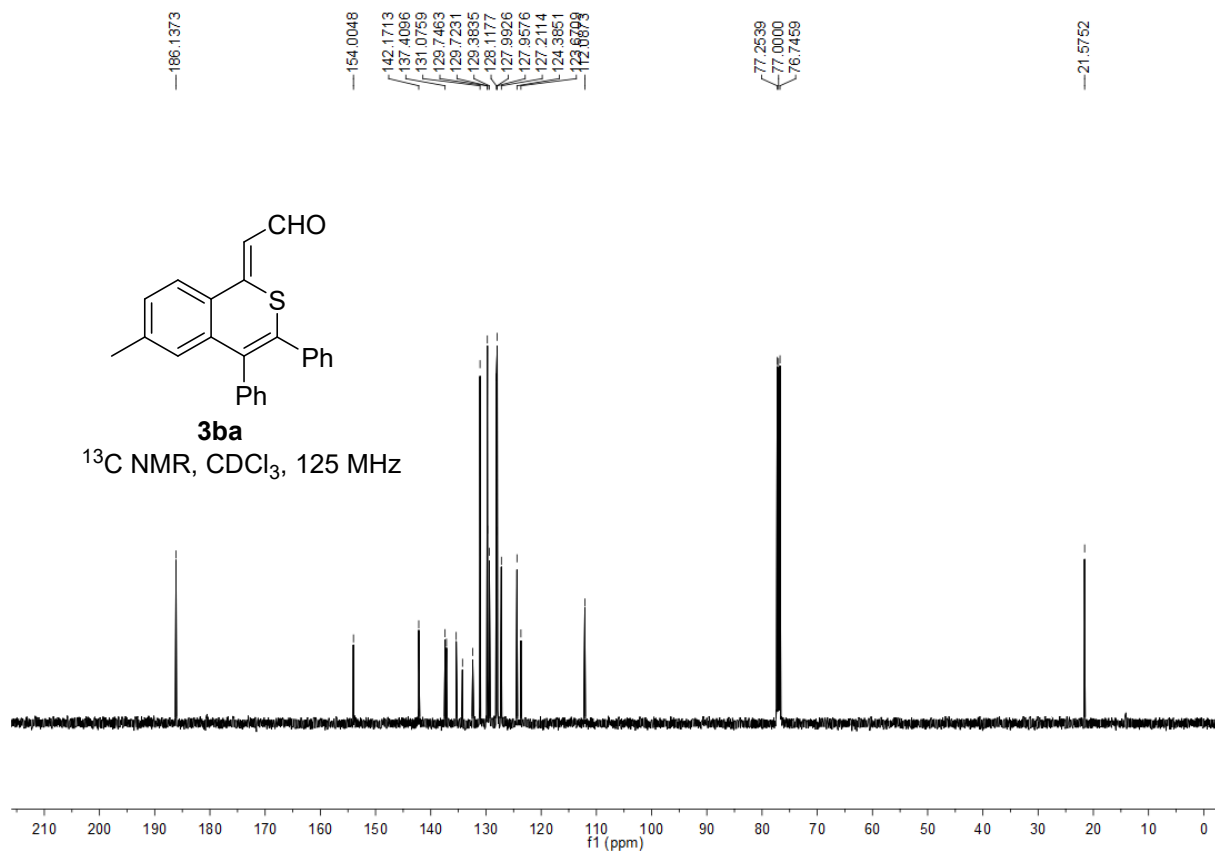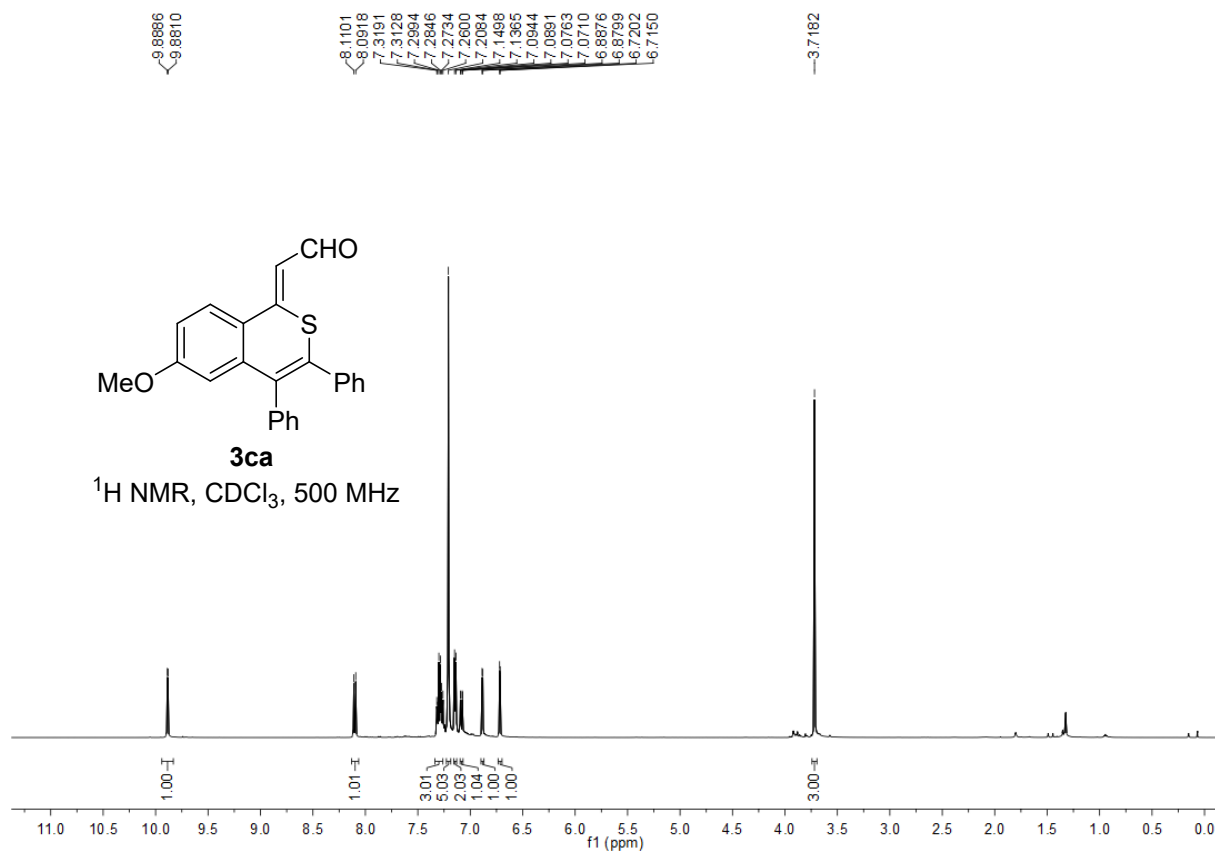

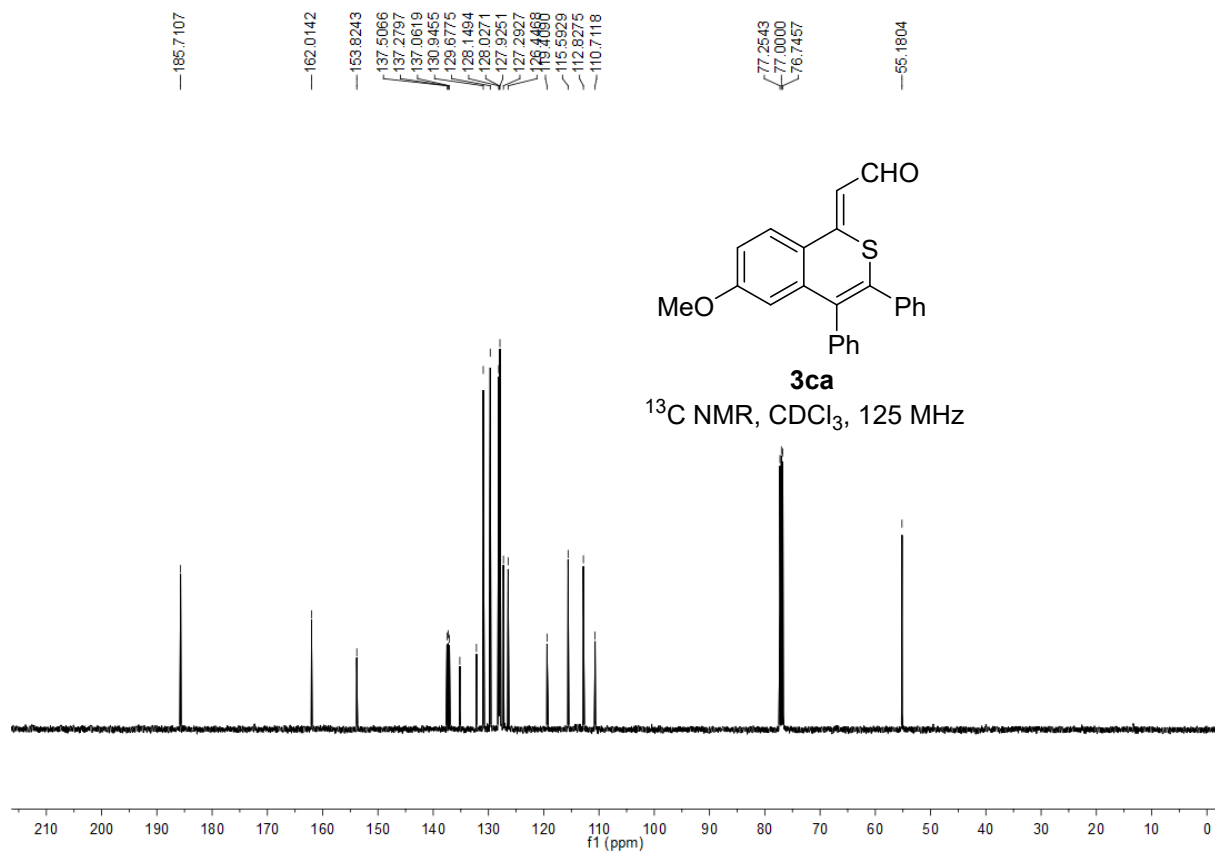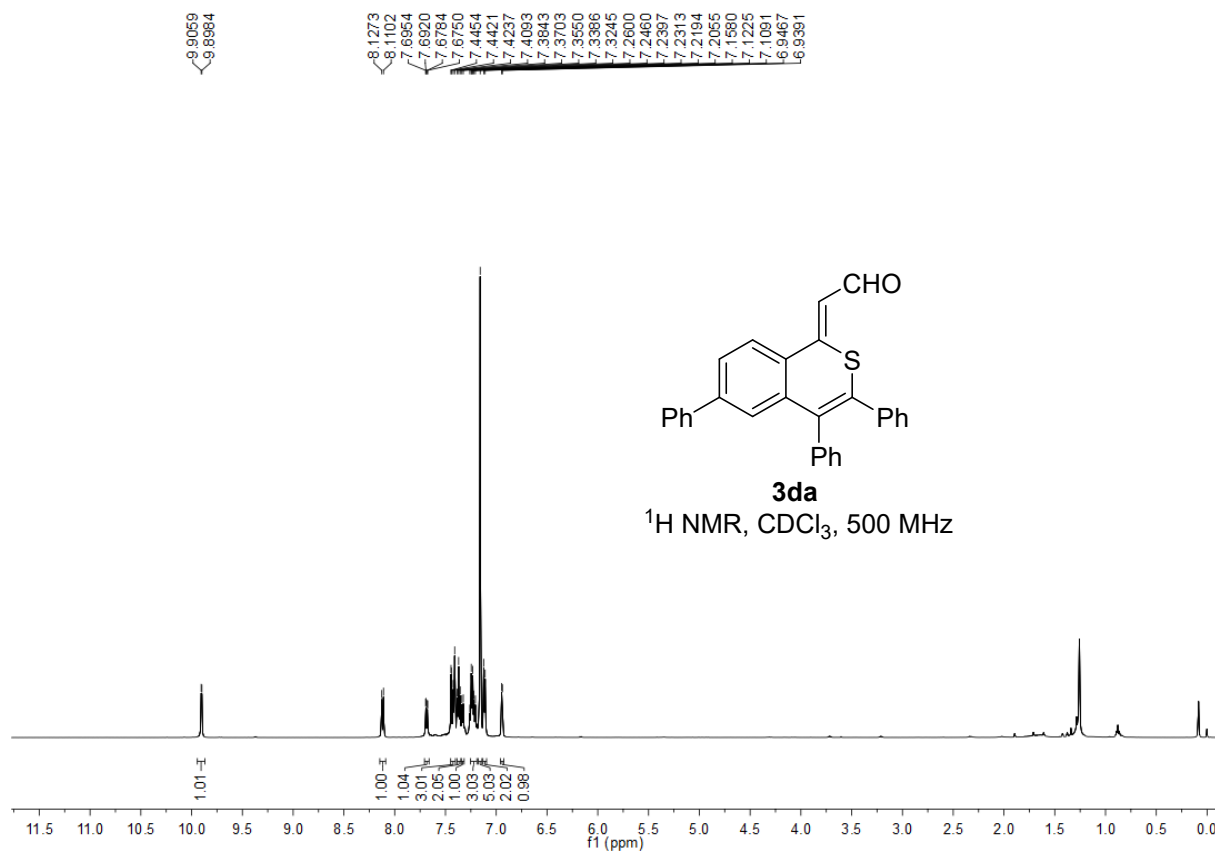

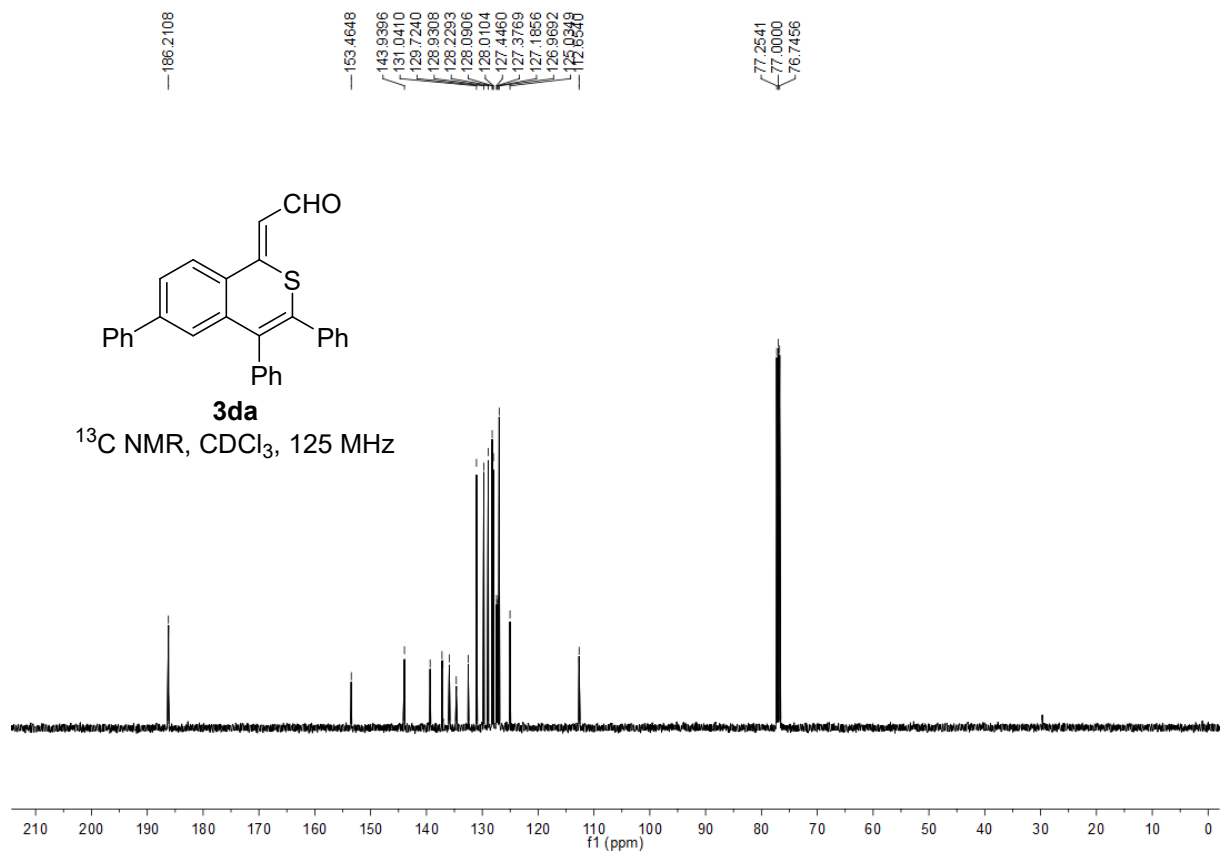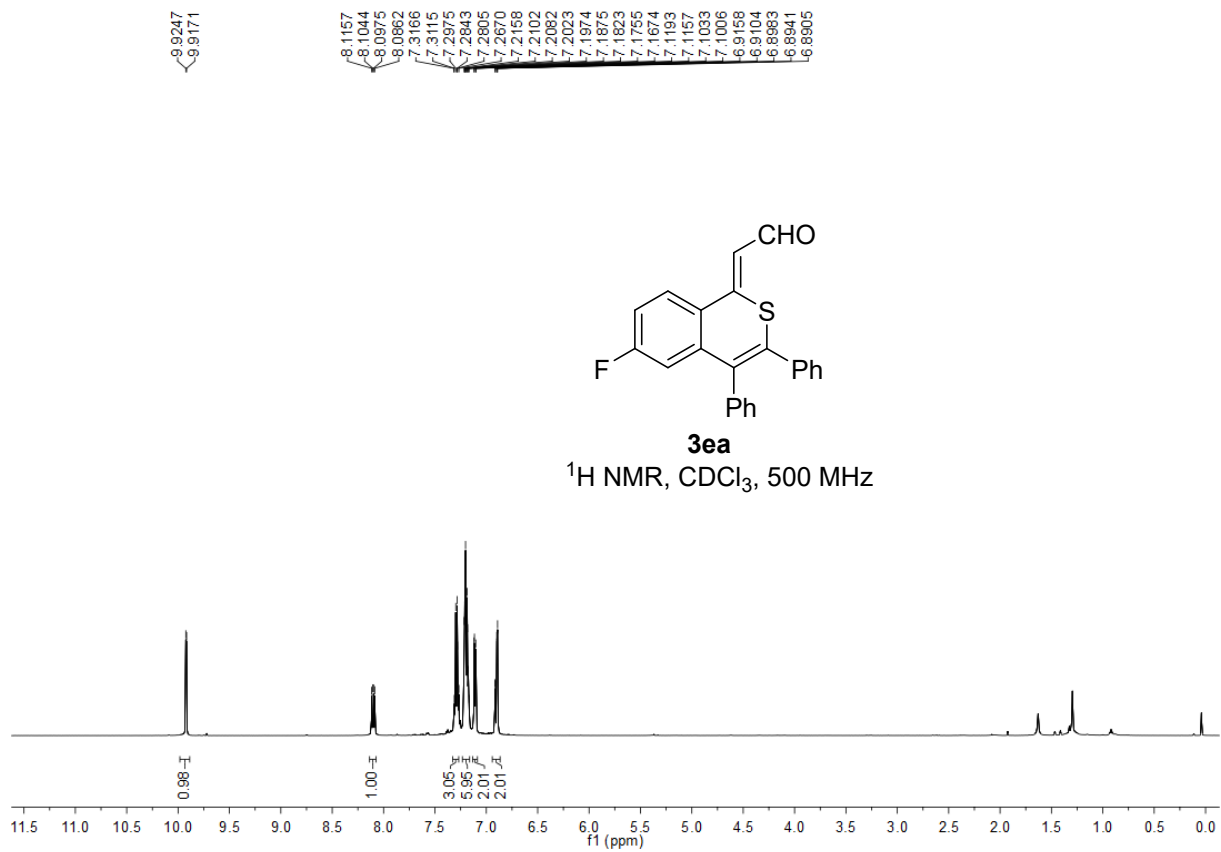

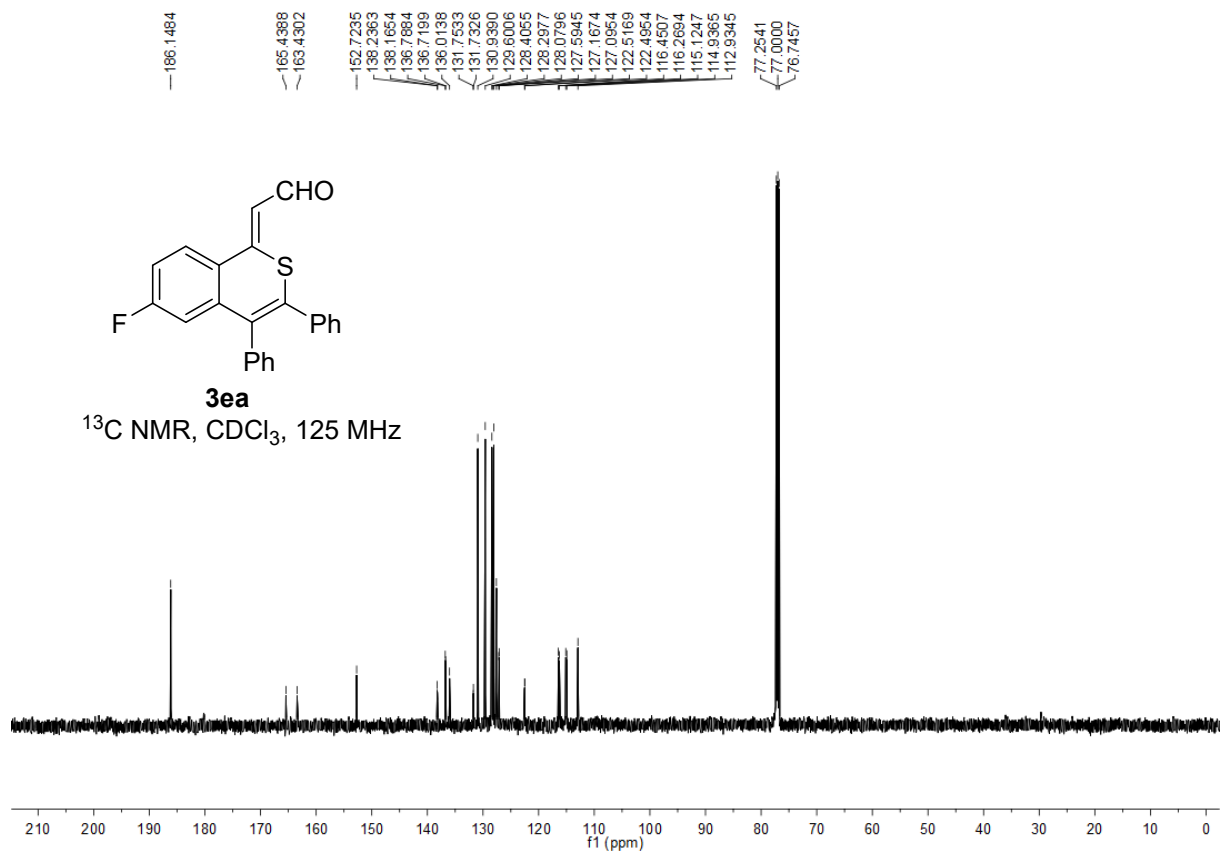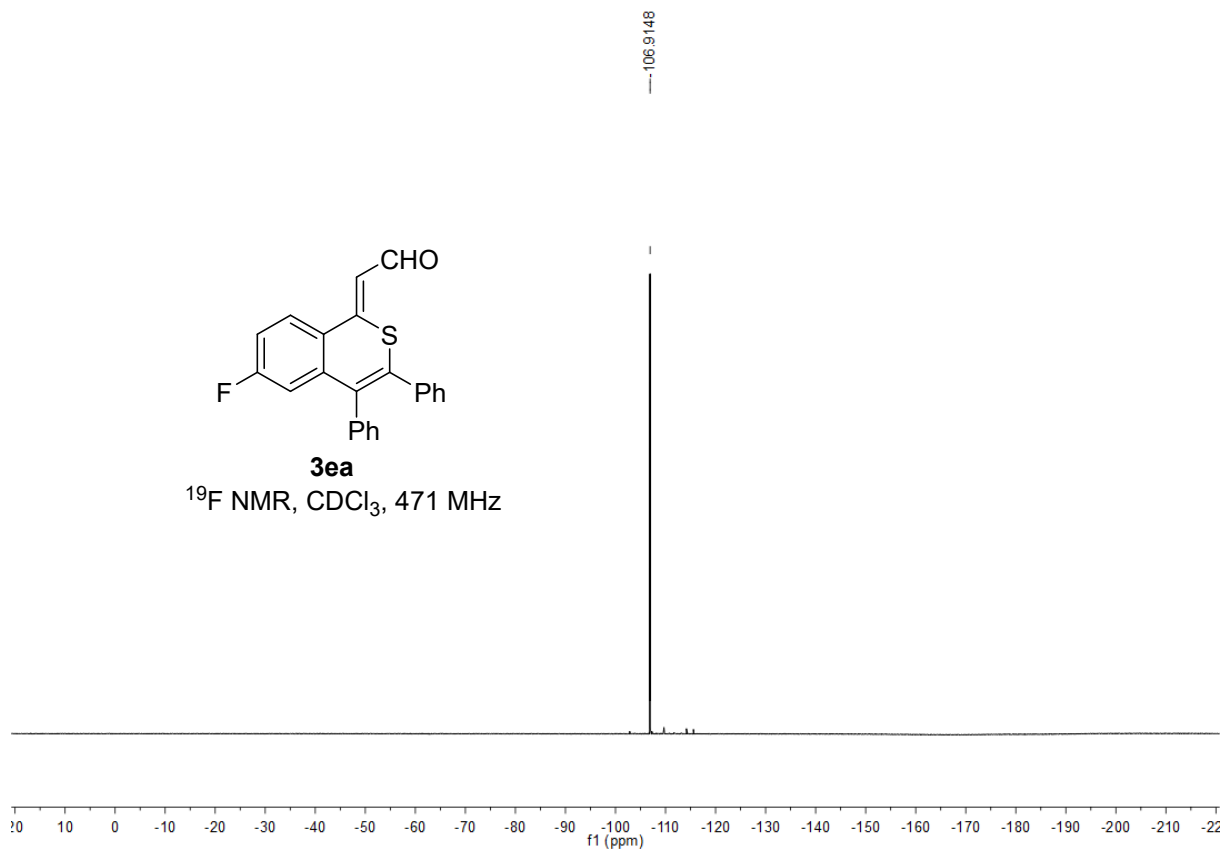



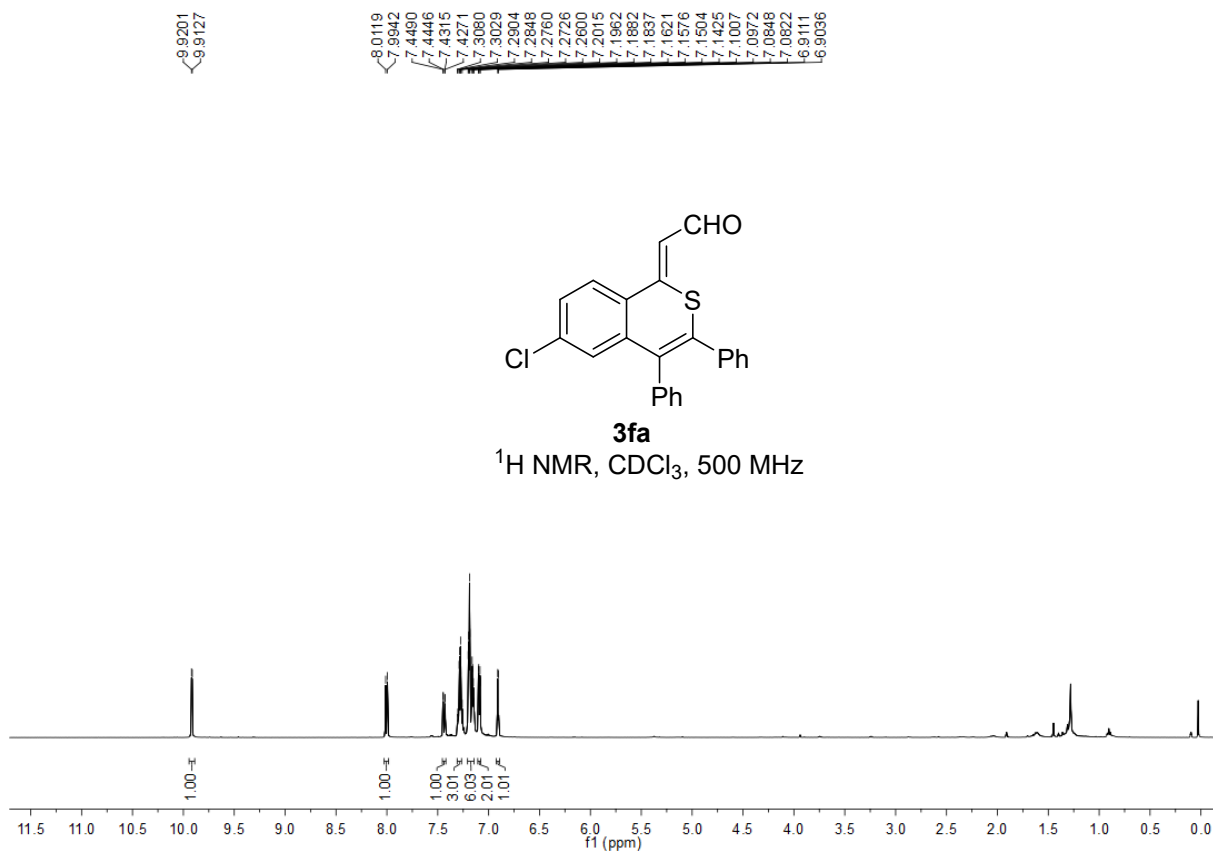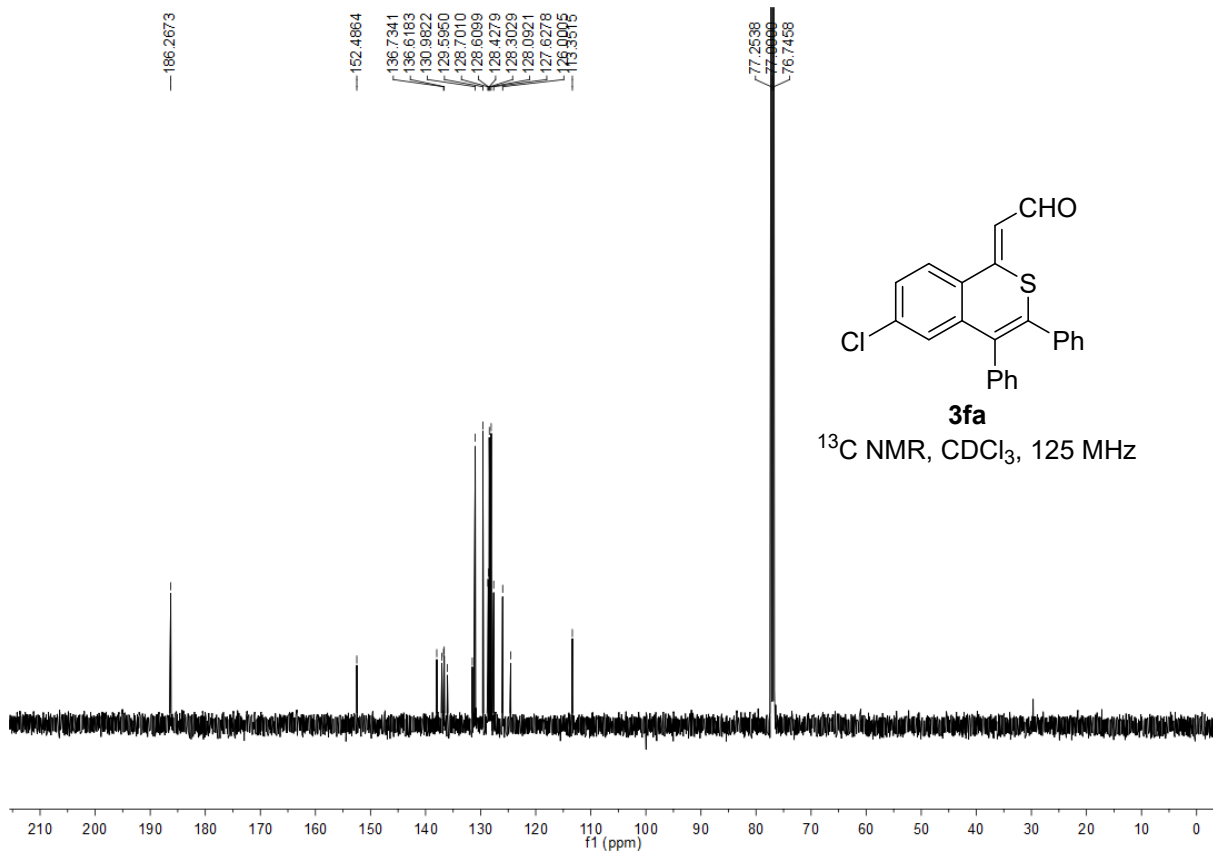

9.9228  
9.9155  
7.9276  
7.9101  
7.8982  
7.8866  
7.8819  
7.8781  
7.8503  
7.8466  
7.8043  
7.8878  
7.8770  
7.2600  
7.2022  
7.1969  
7.1895  
7.1603  
7.1561  
7.1490  
7.1414  
7.0895  
7.0846  
6.9155  
6.9082

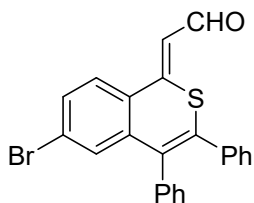

**3ga**

$^1\text{H NMR}$ ,  $\text{CDCl}_3$ , 500 MHz

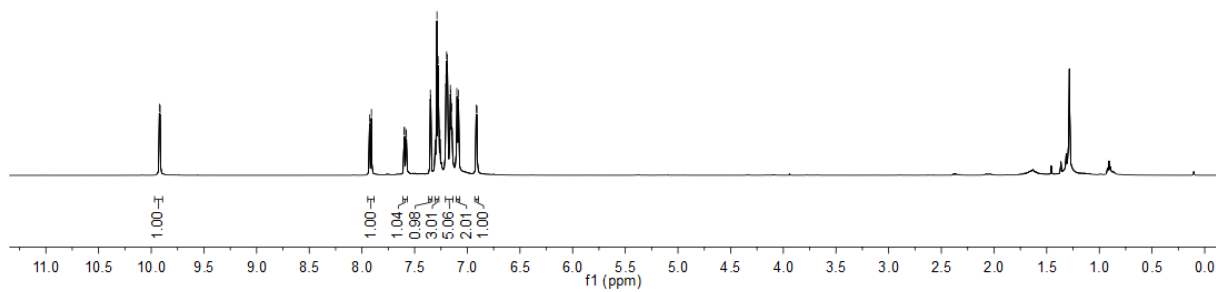

186.2818

152.5386

131.6278  
131.5769  
130.9669  
129.5784  
128.4163  
128.2911  
128.0605  
127.6271  
126.4903  
126.0030  
124.9698  
124.5643

77.2541  
77.0000  
76.7459

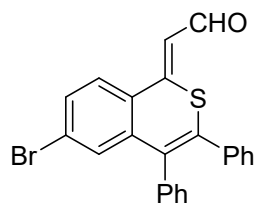

**3ga**

$^{13}\text{C NMR}$ ,  $\text{CDCl}_3$ , 125 MHz

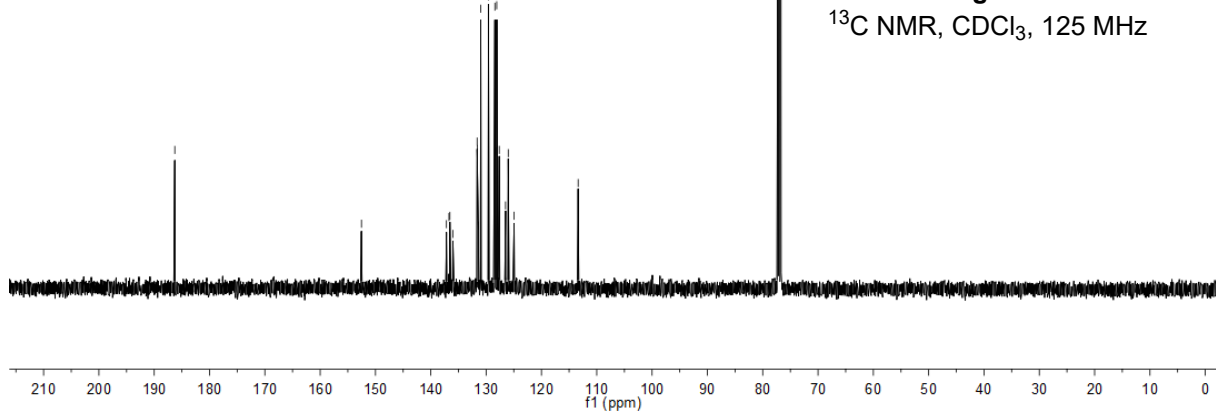

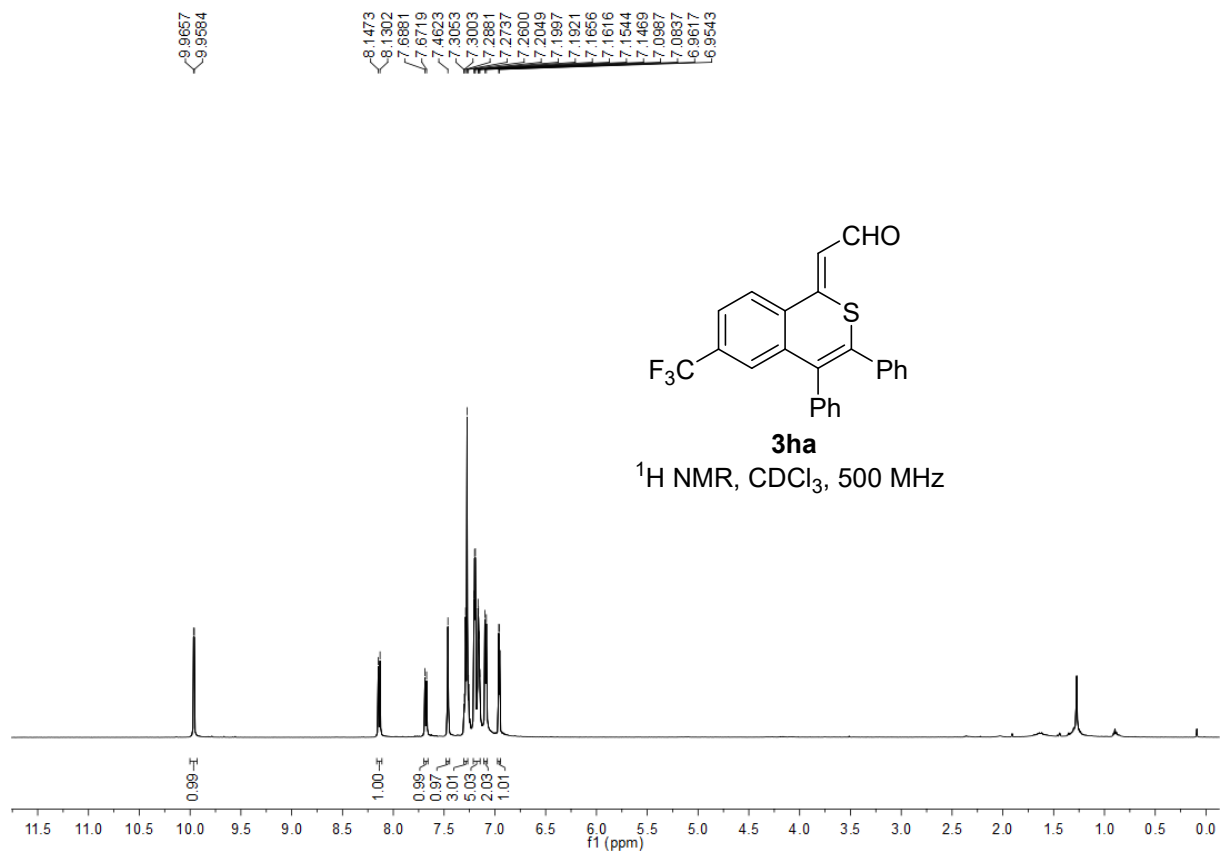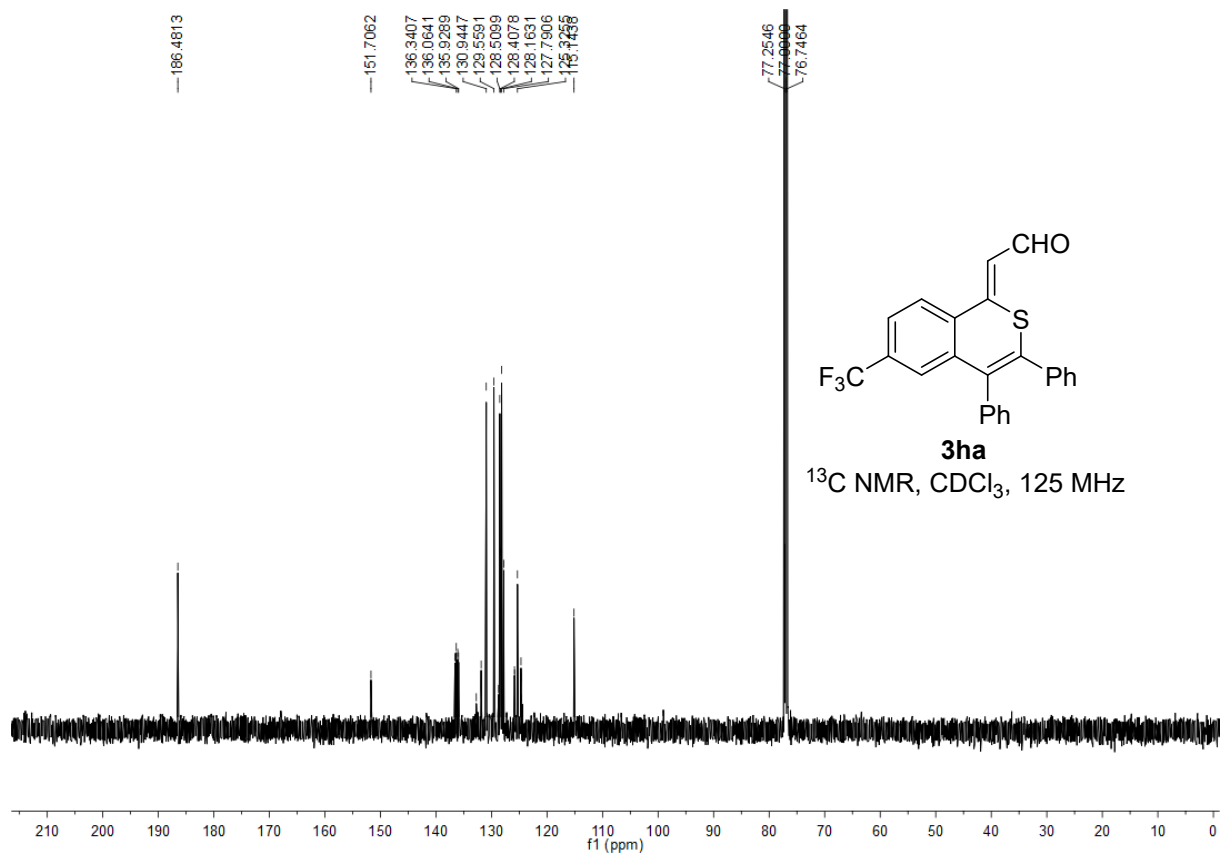

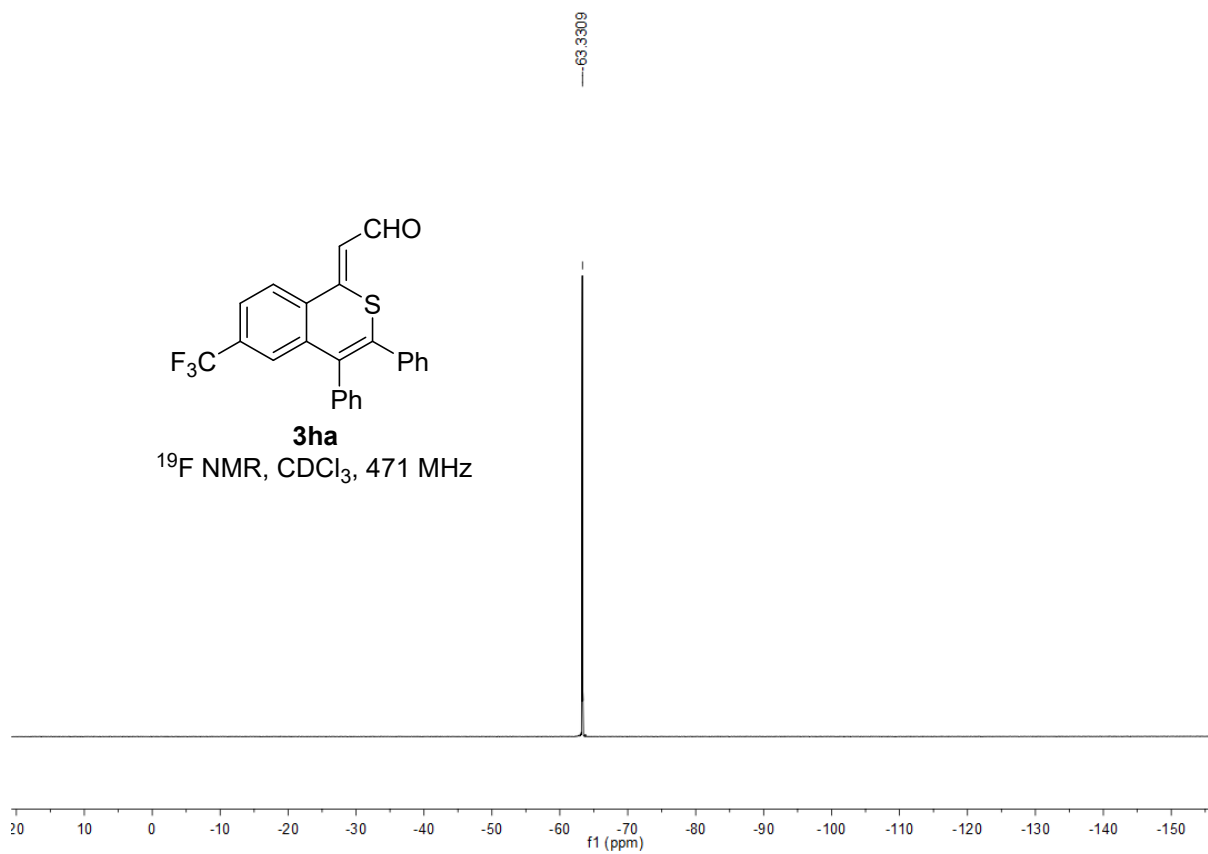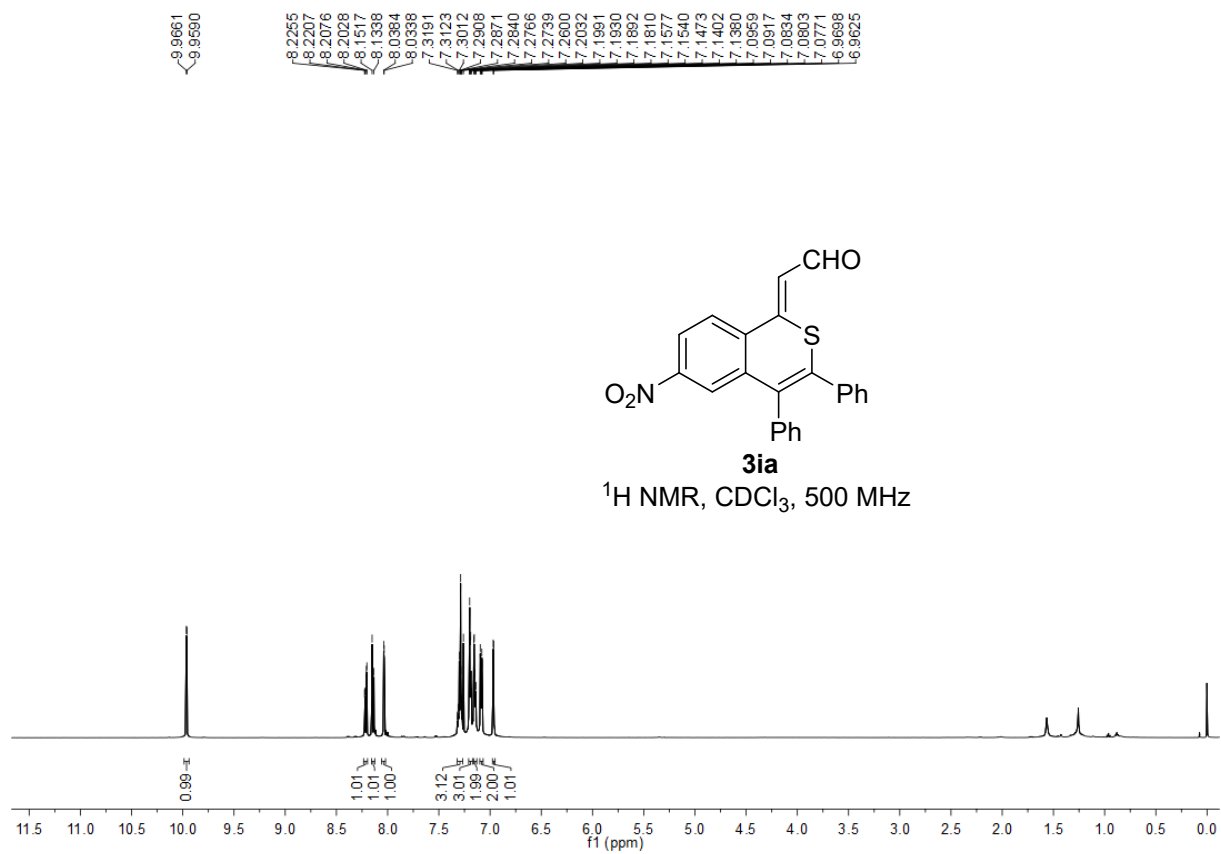

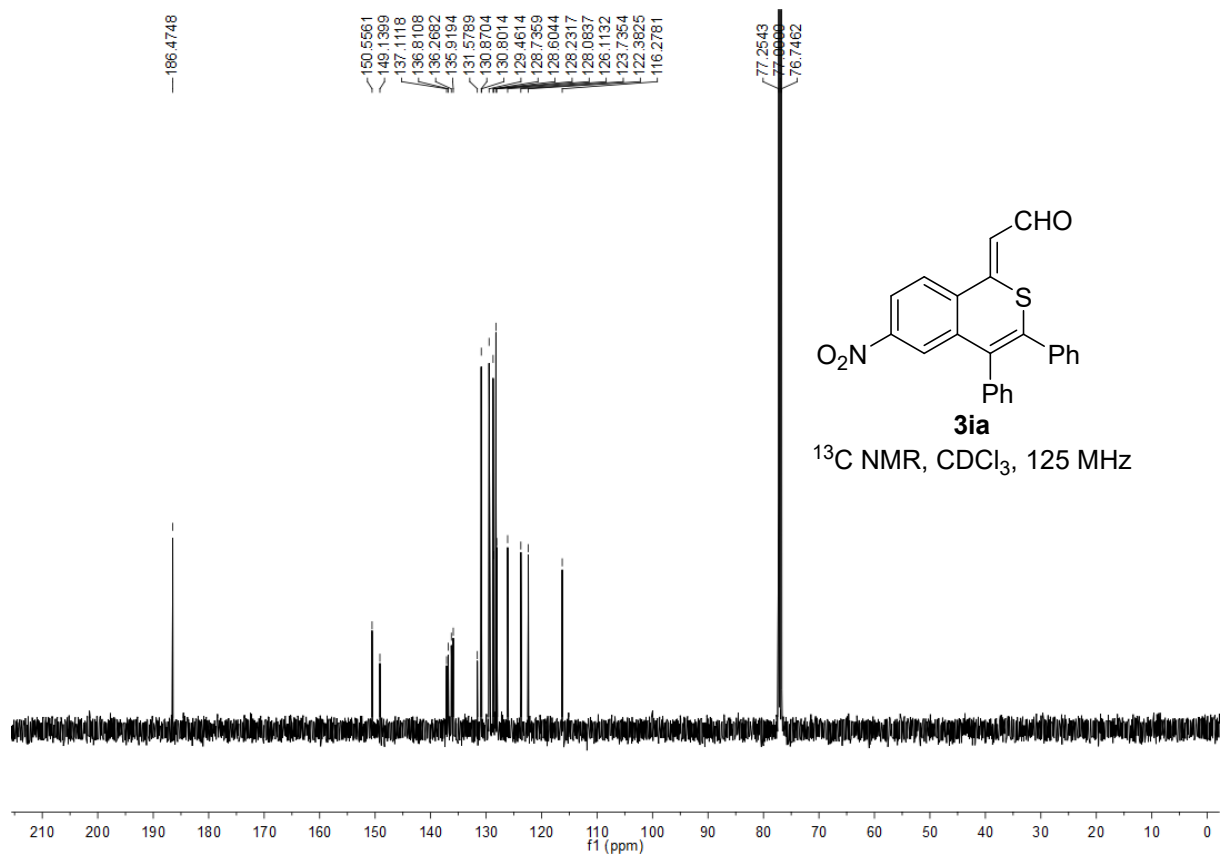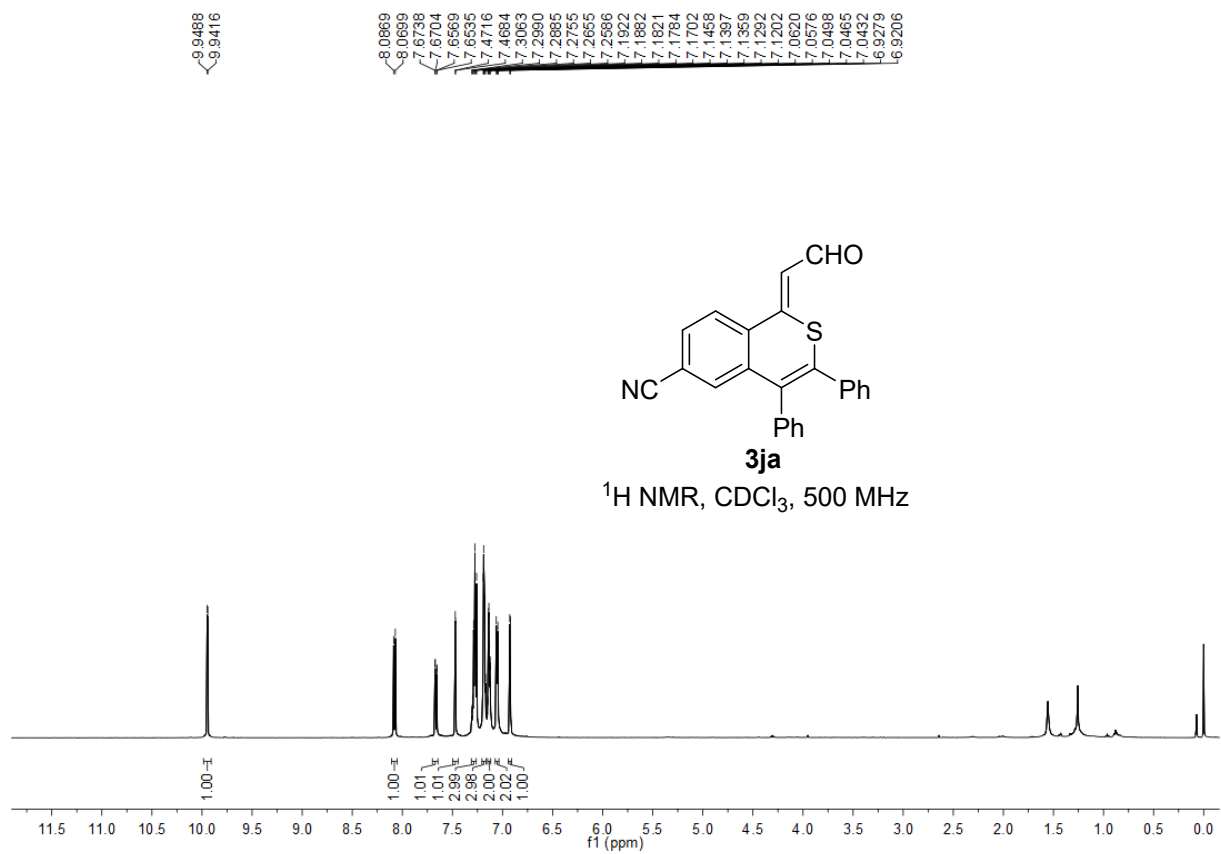

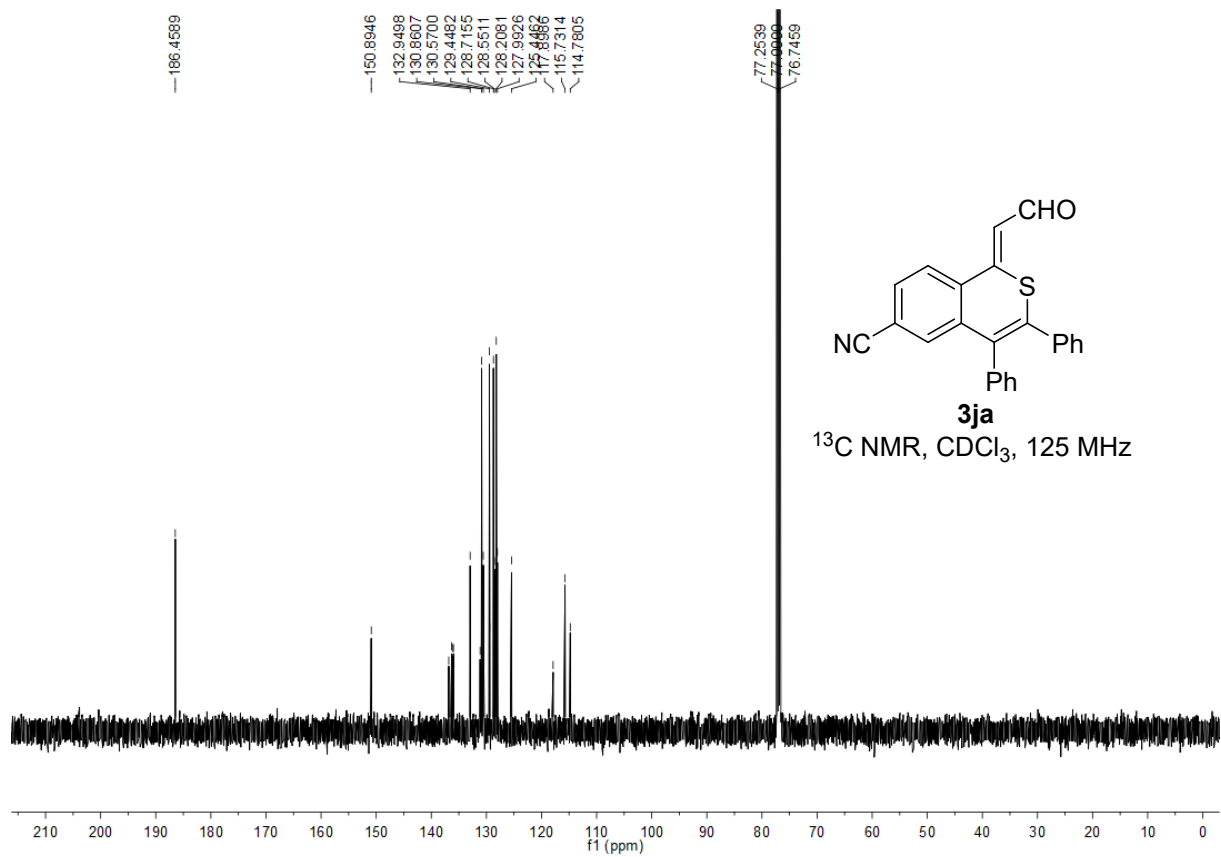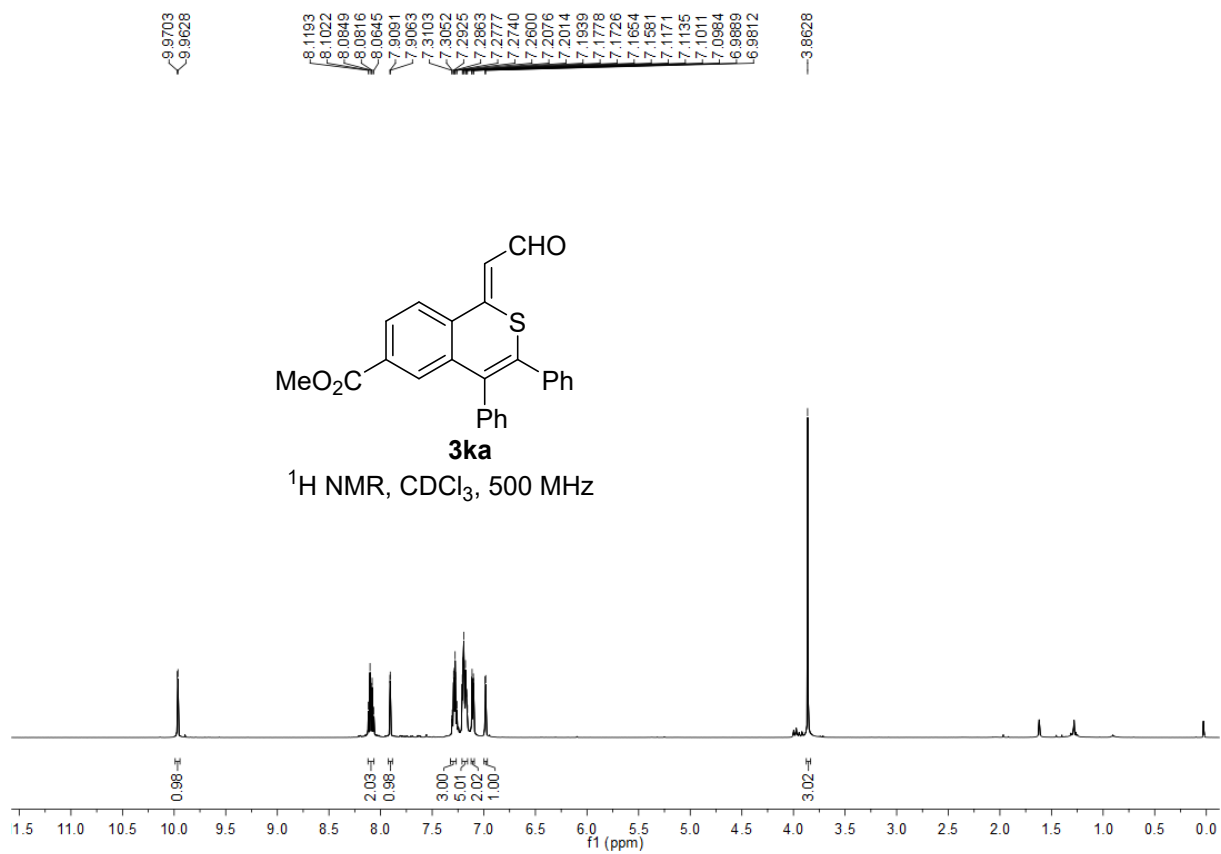

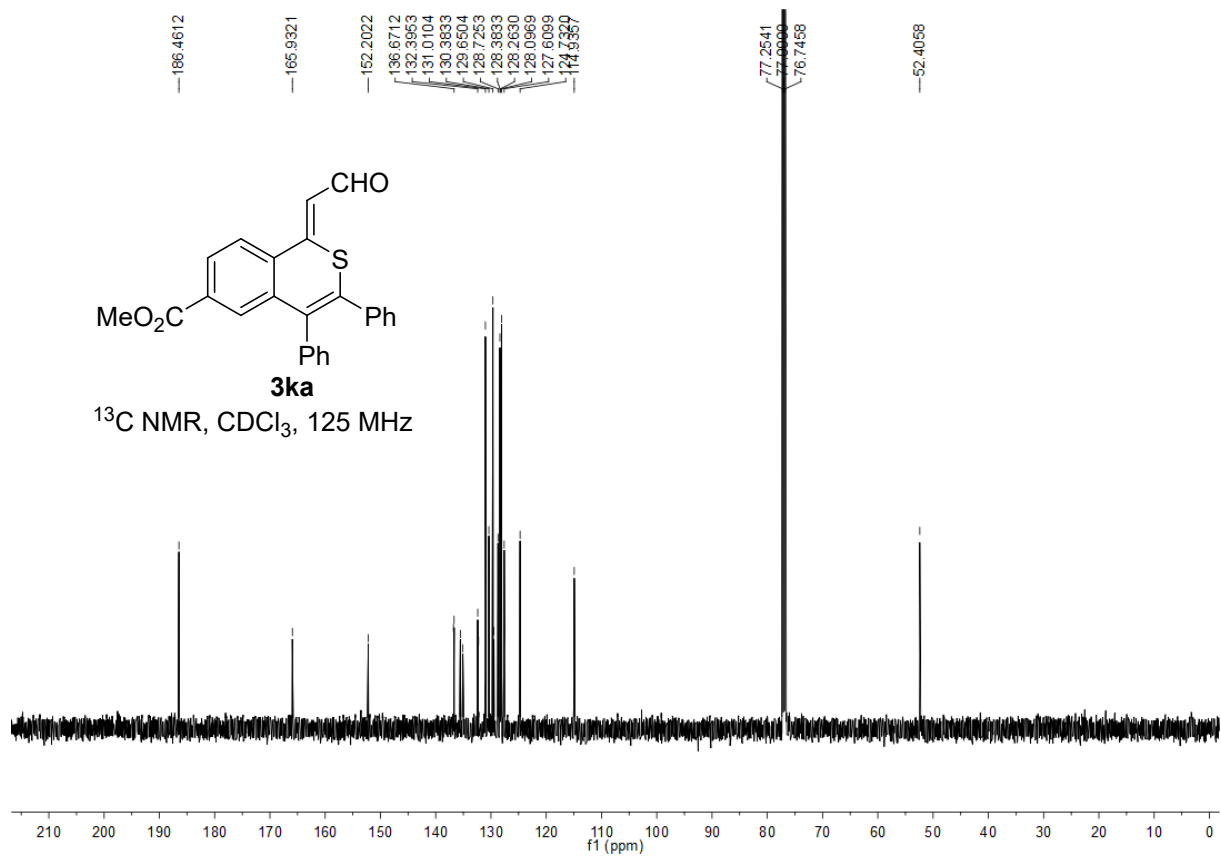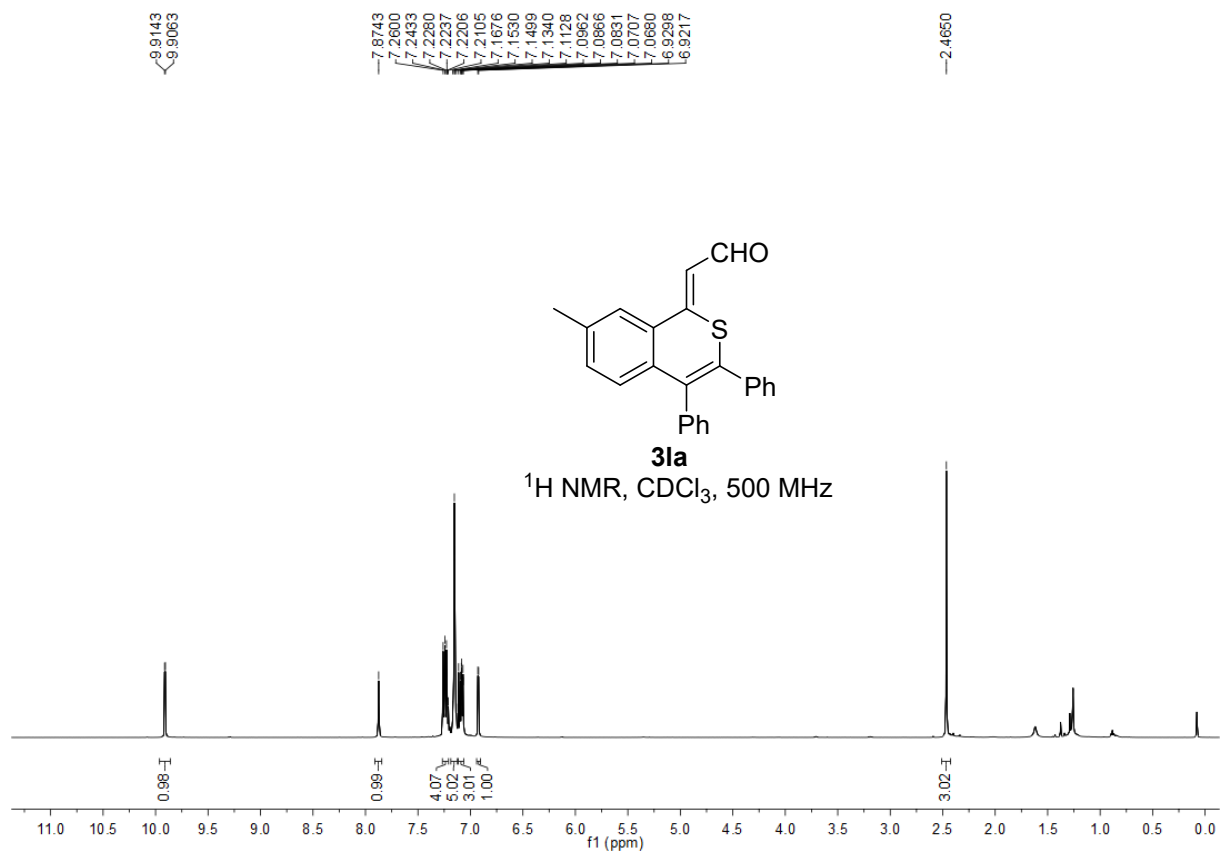

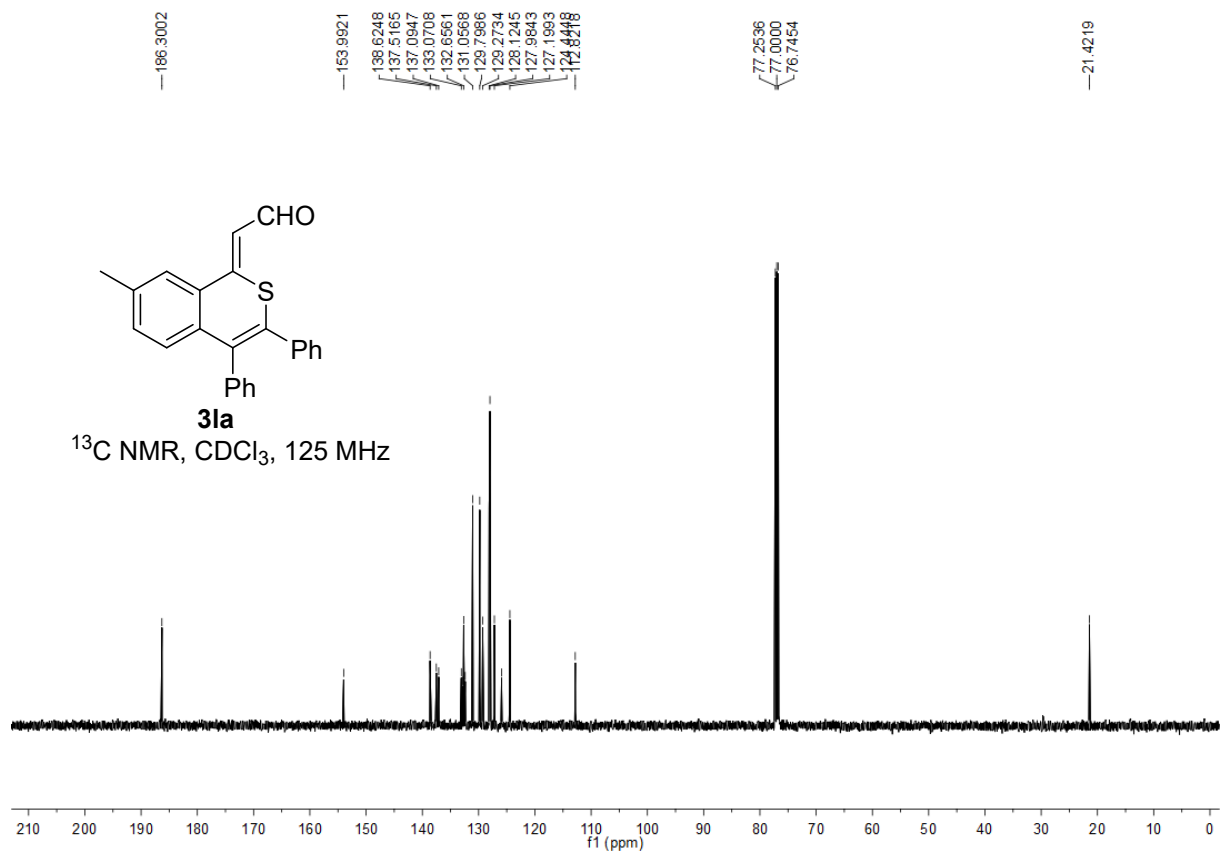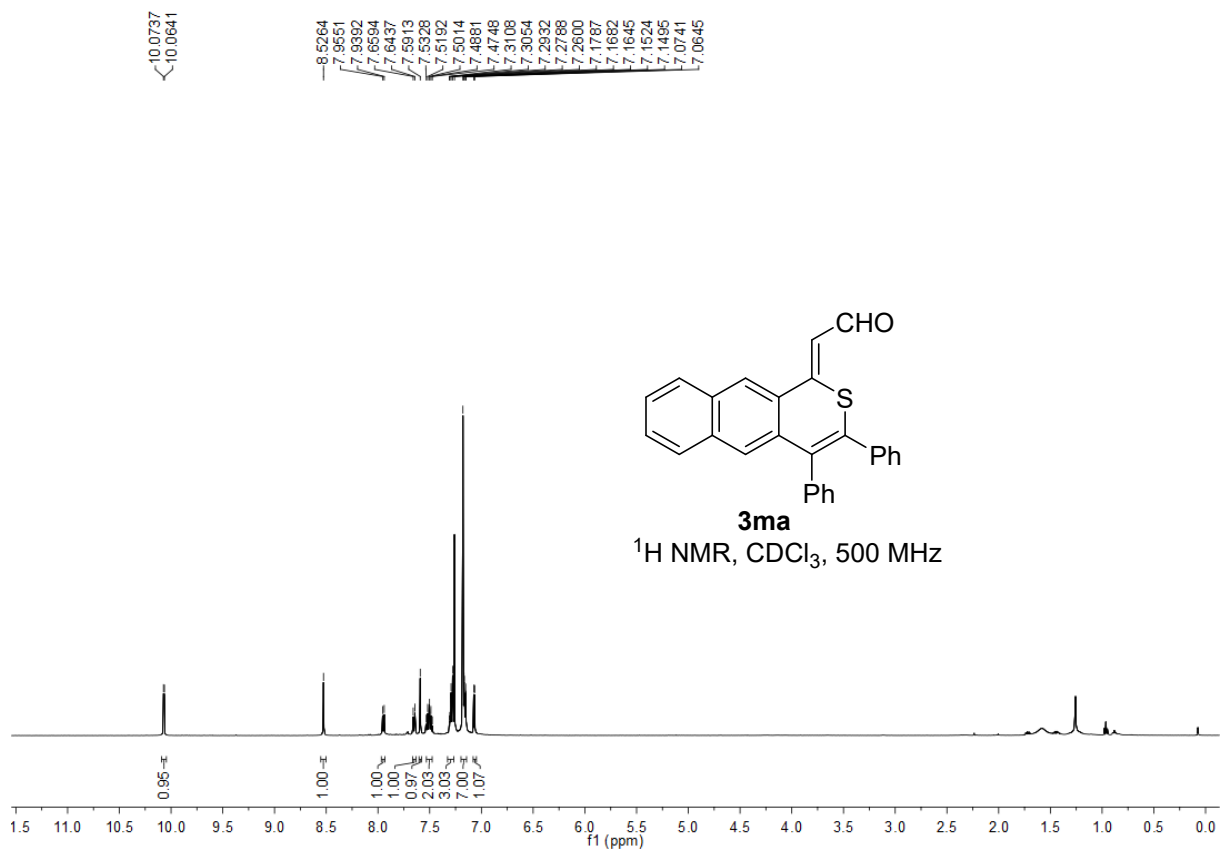



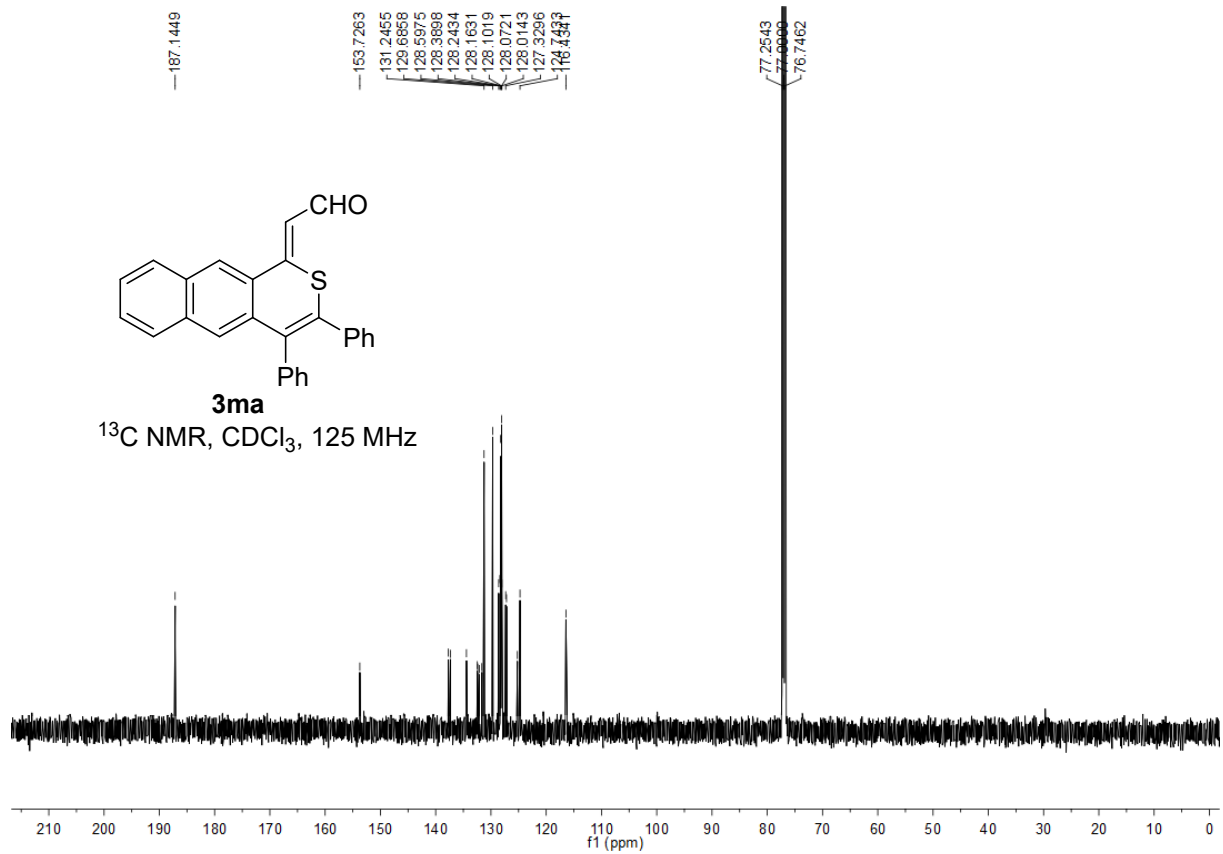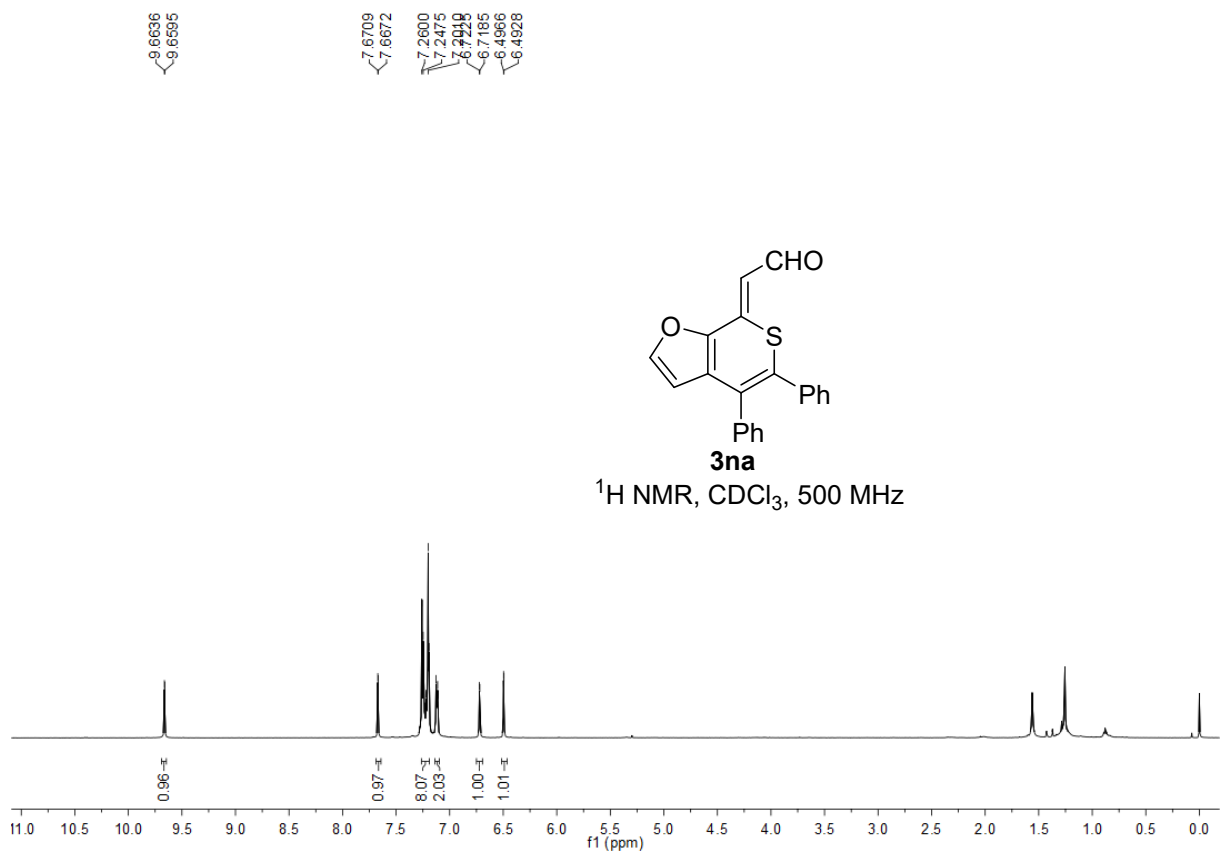

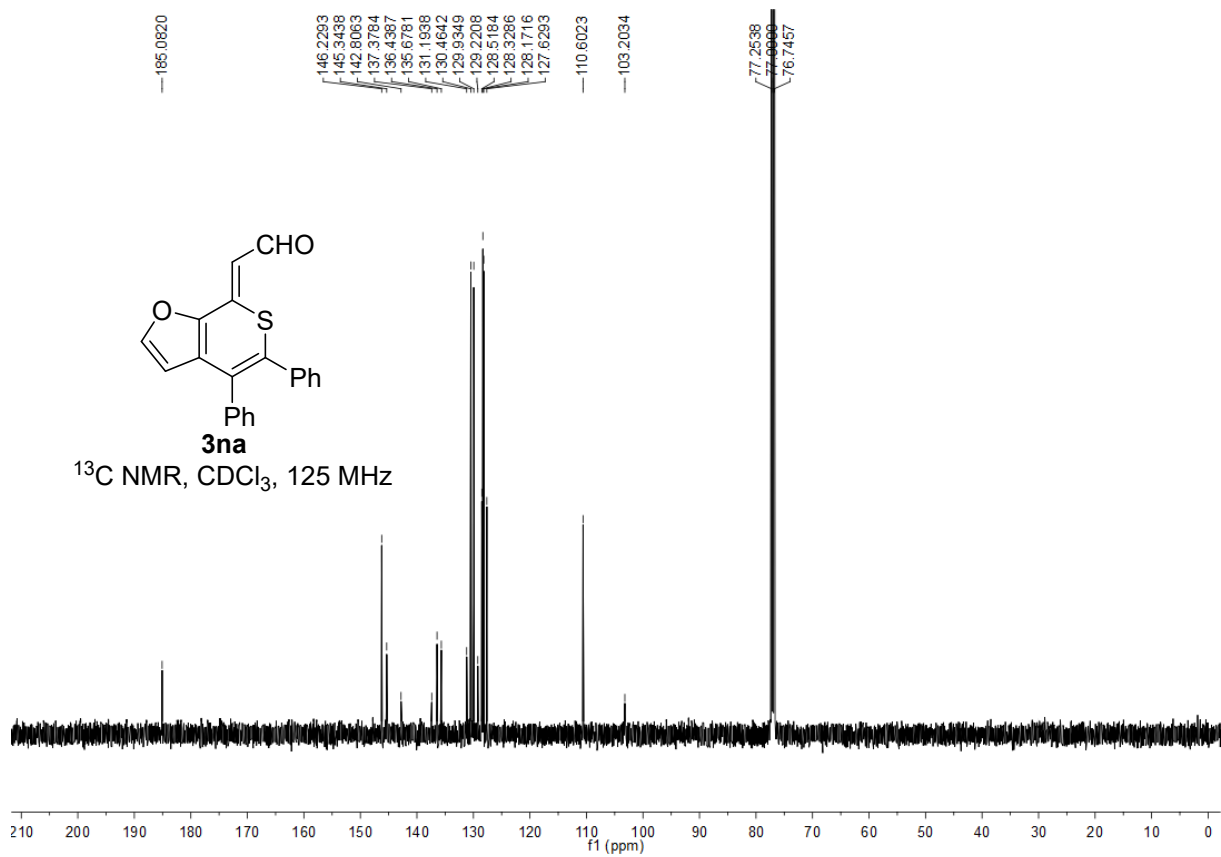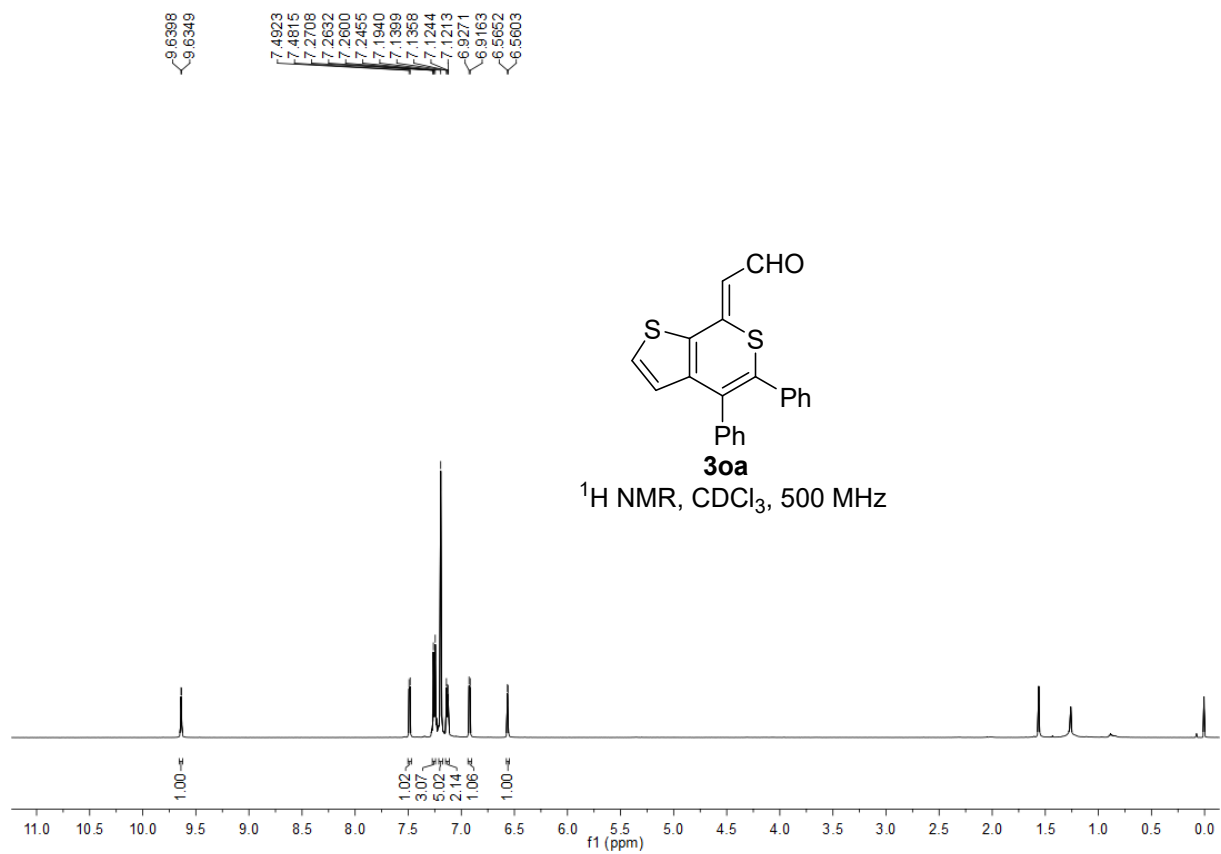

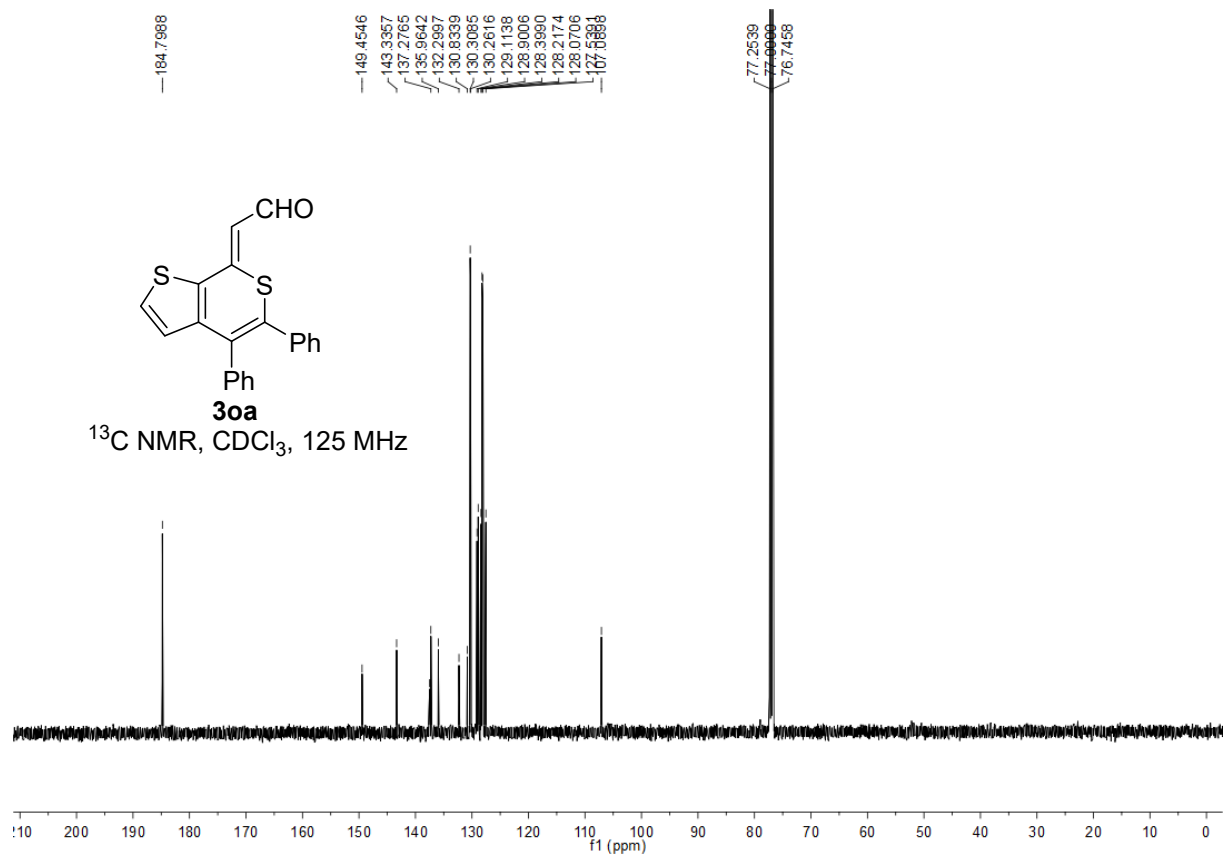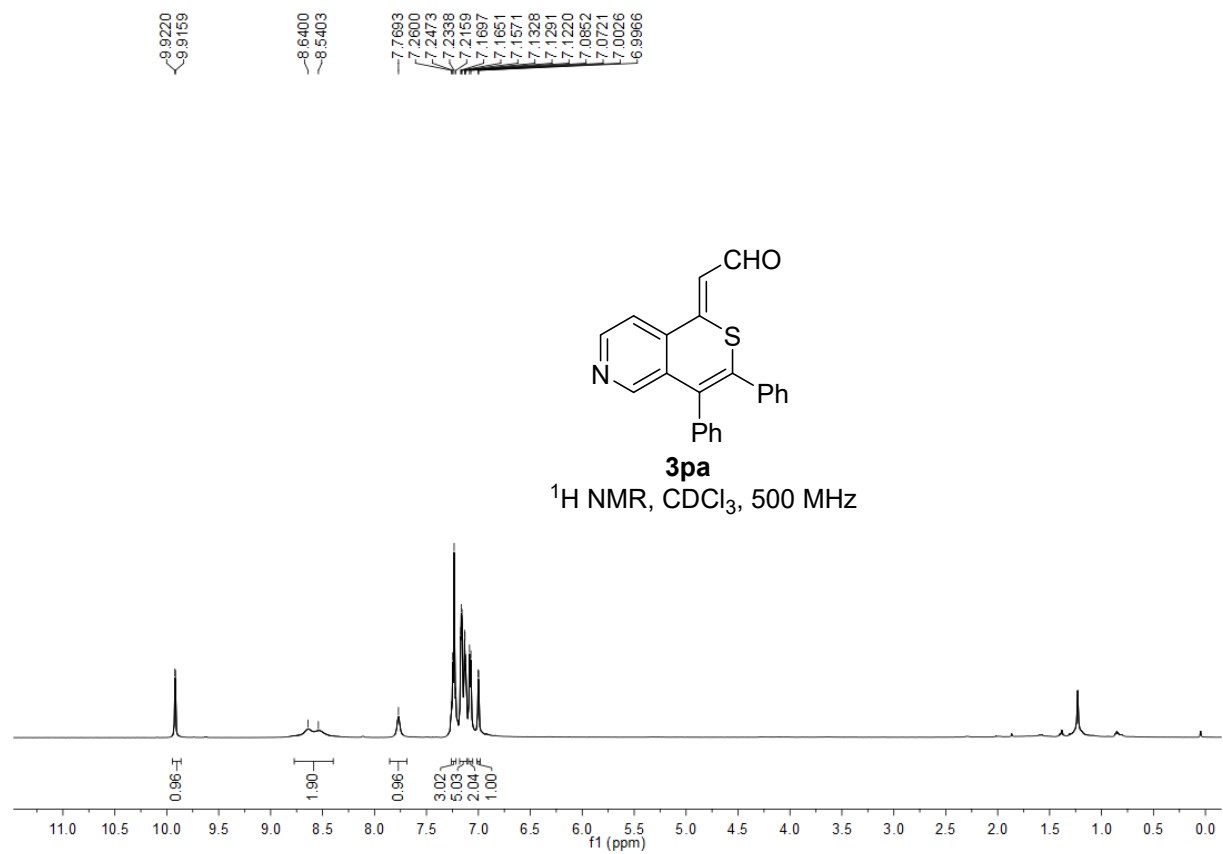

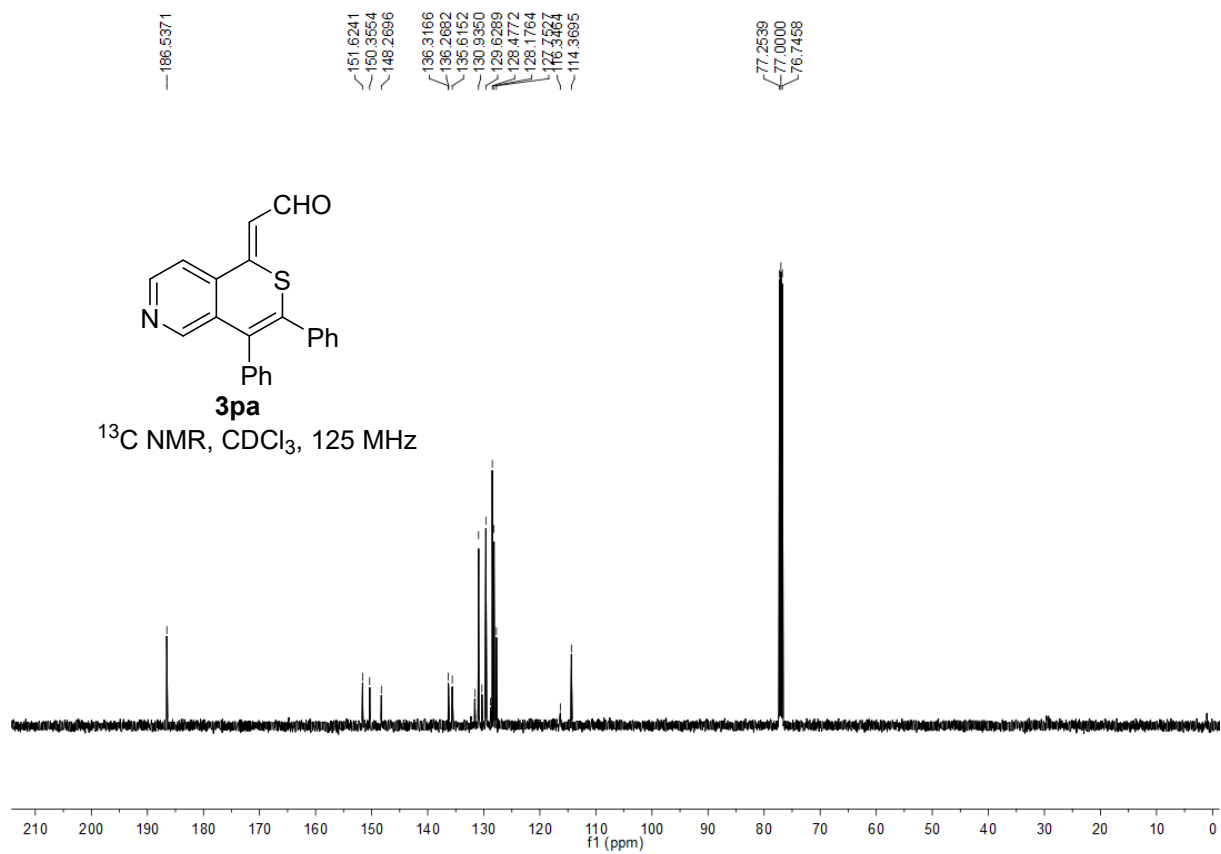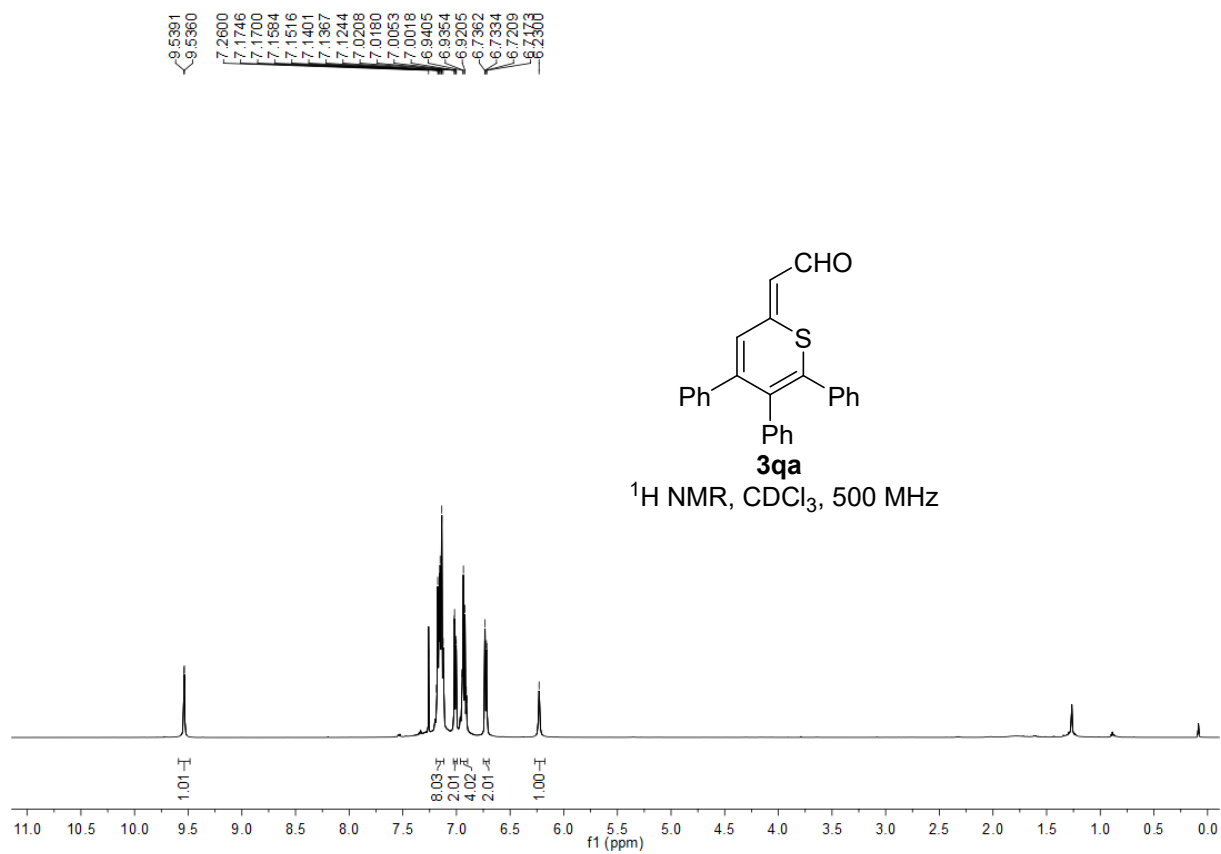

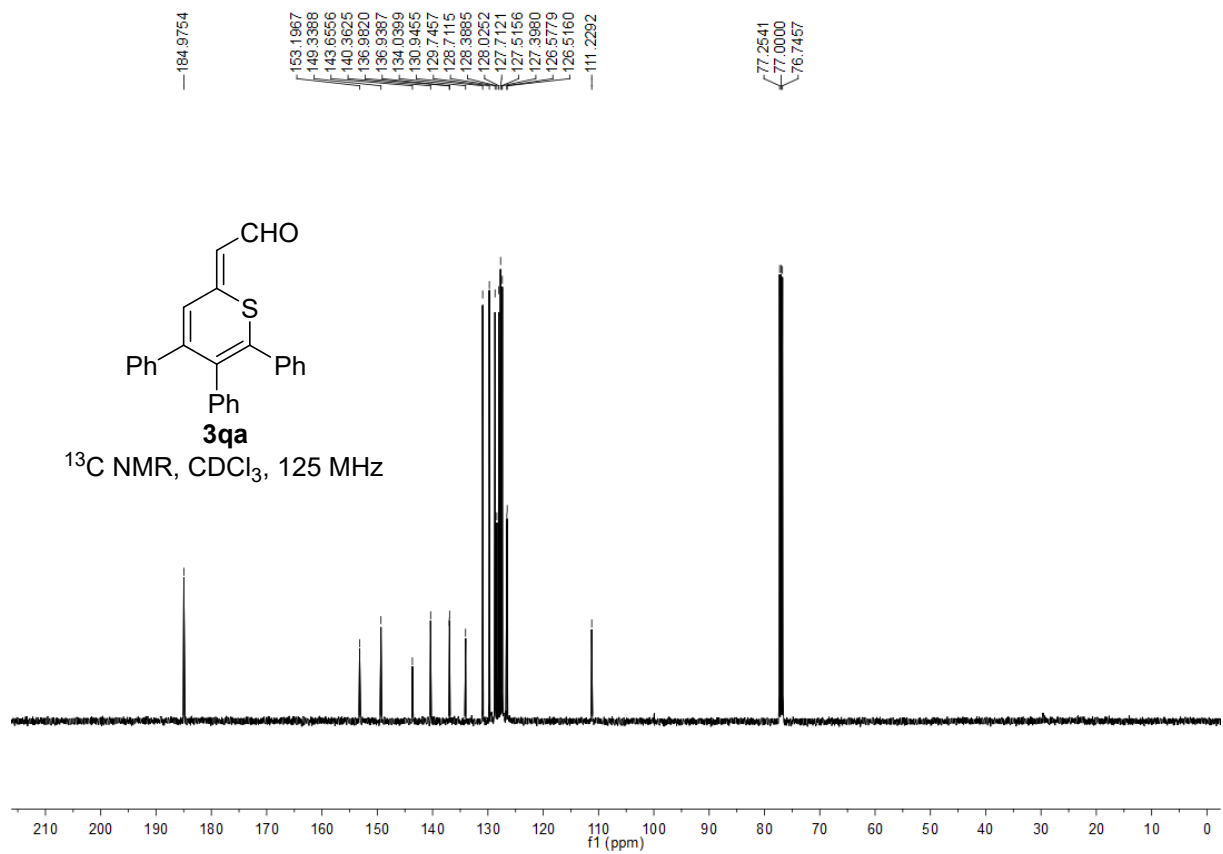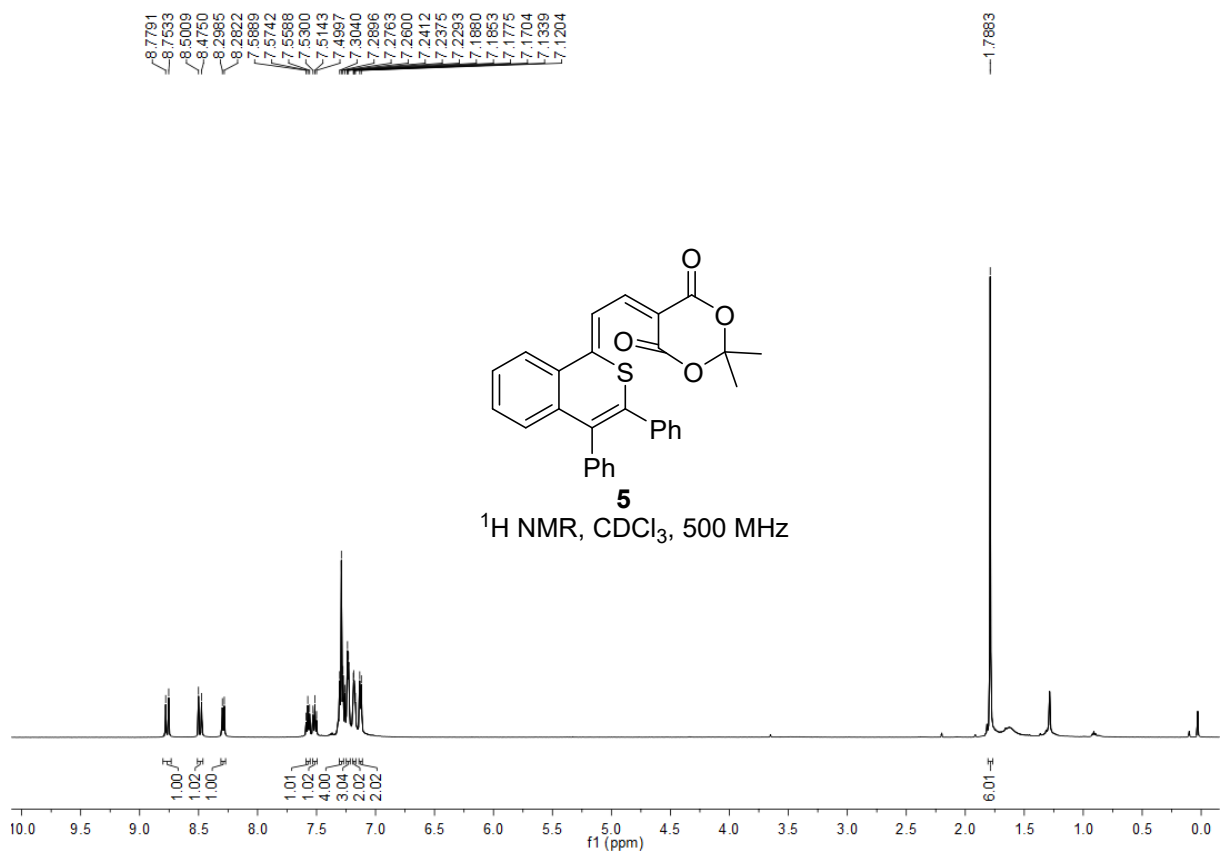

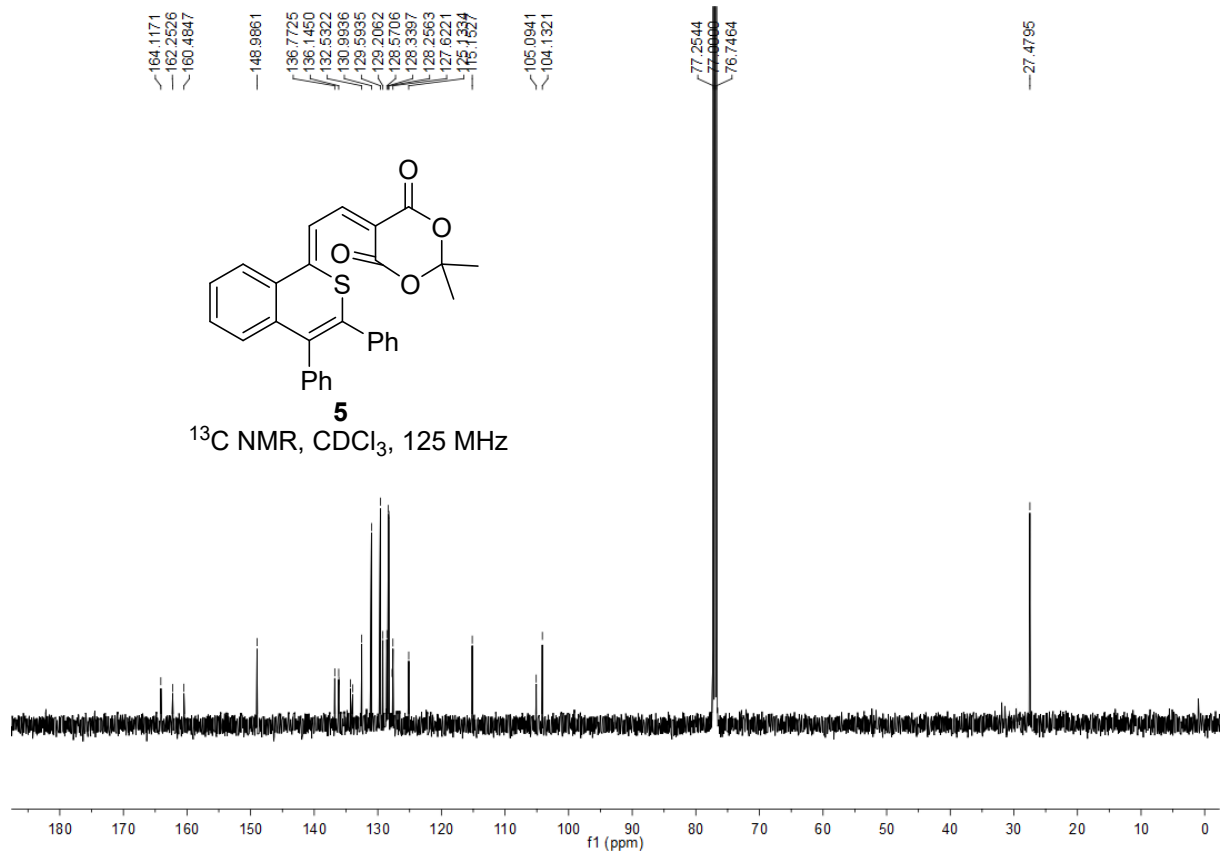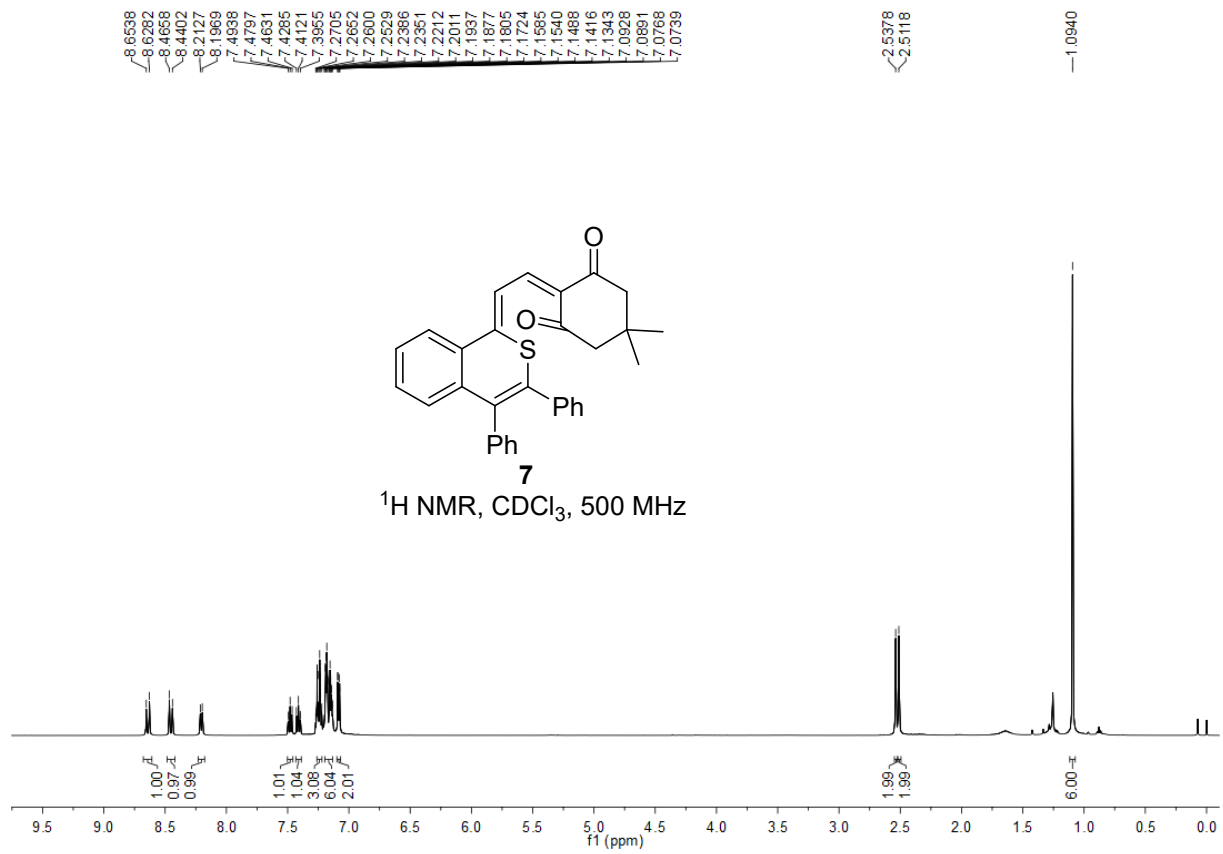

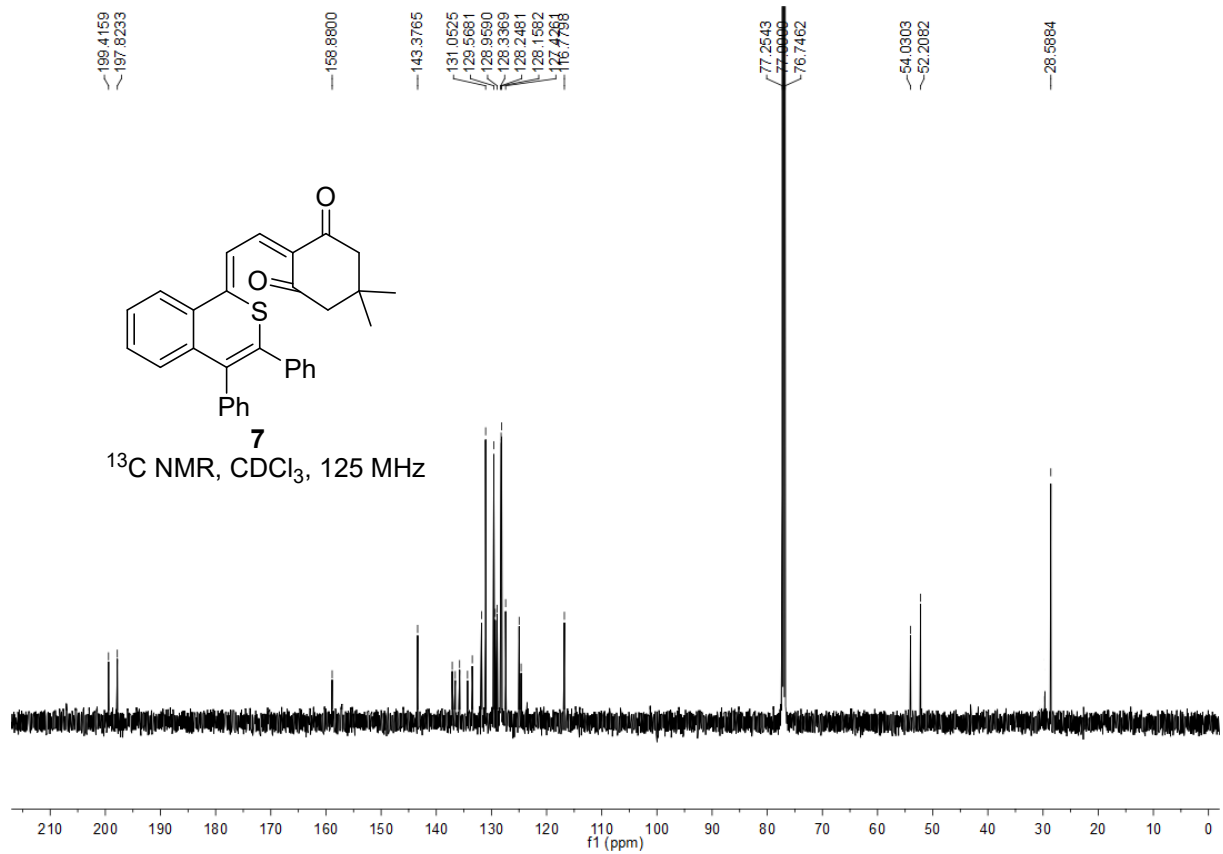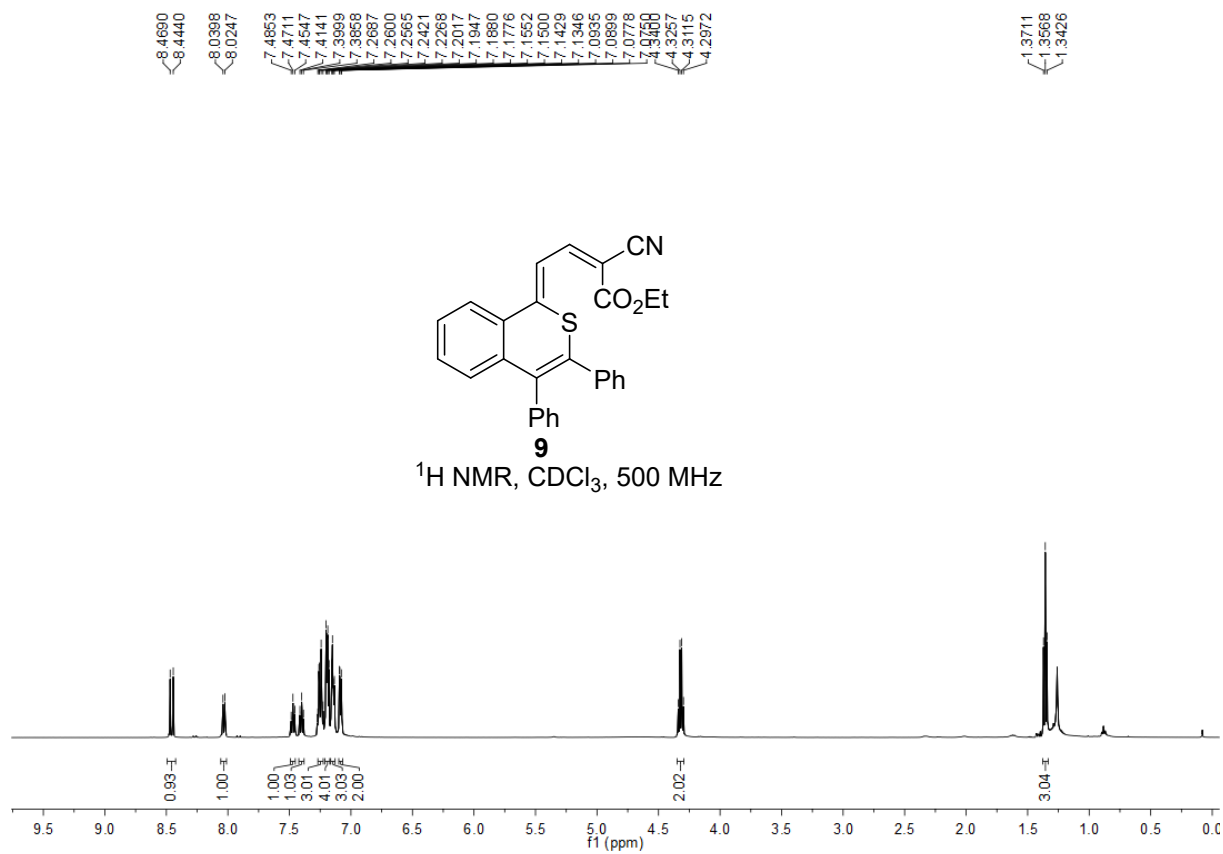

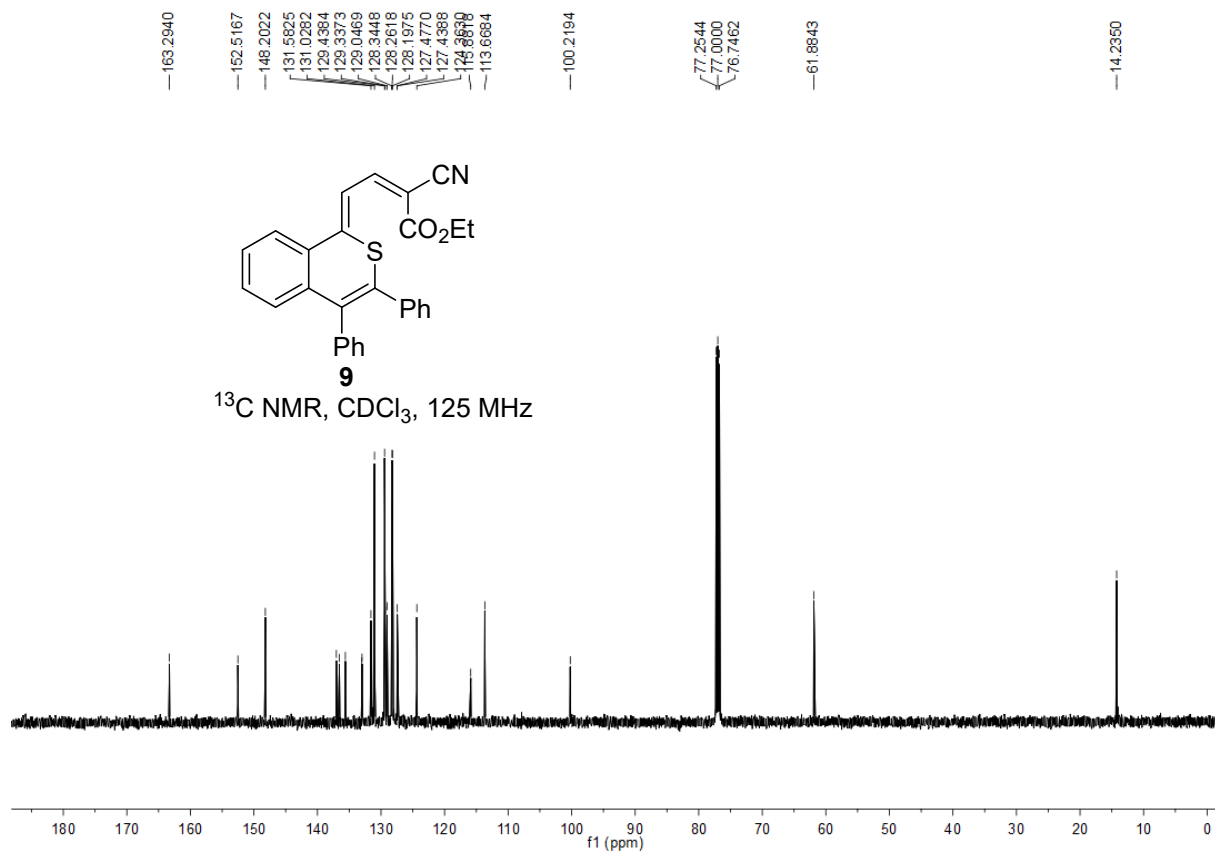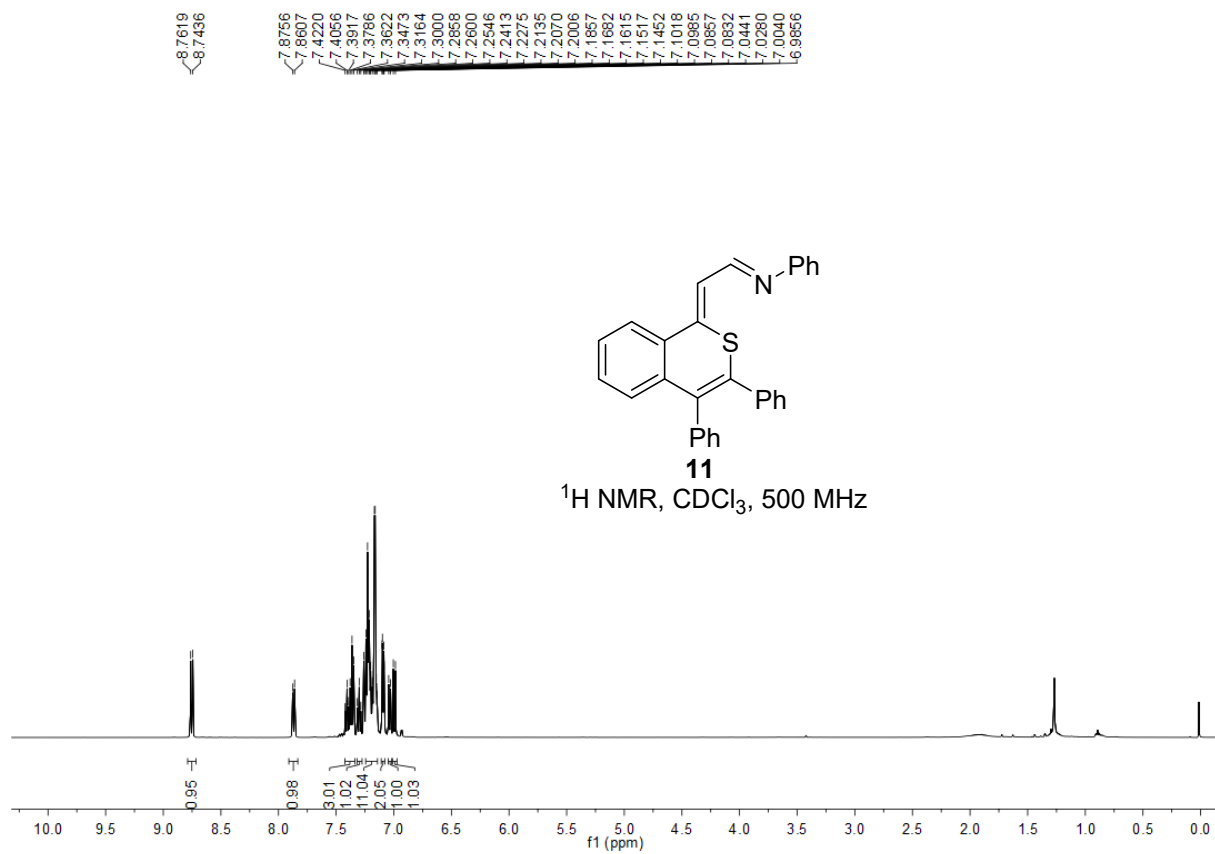



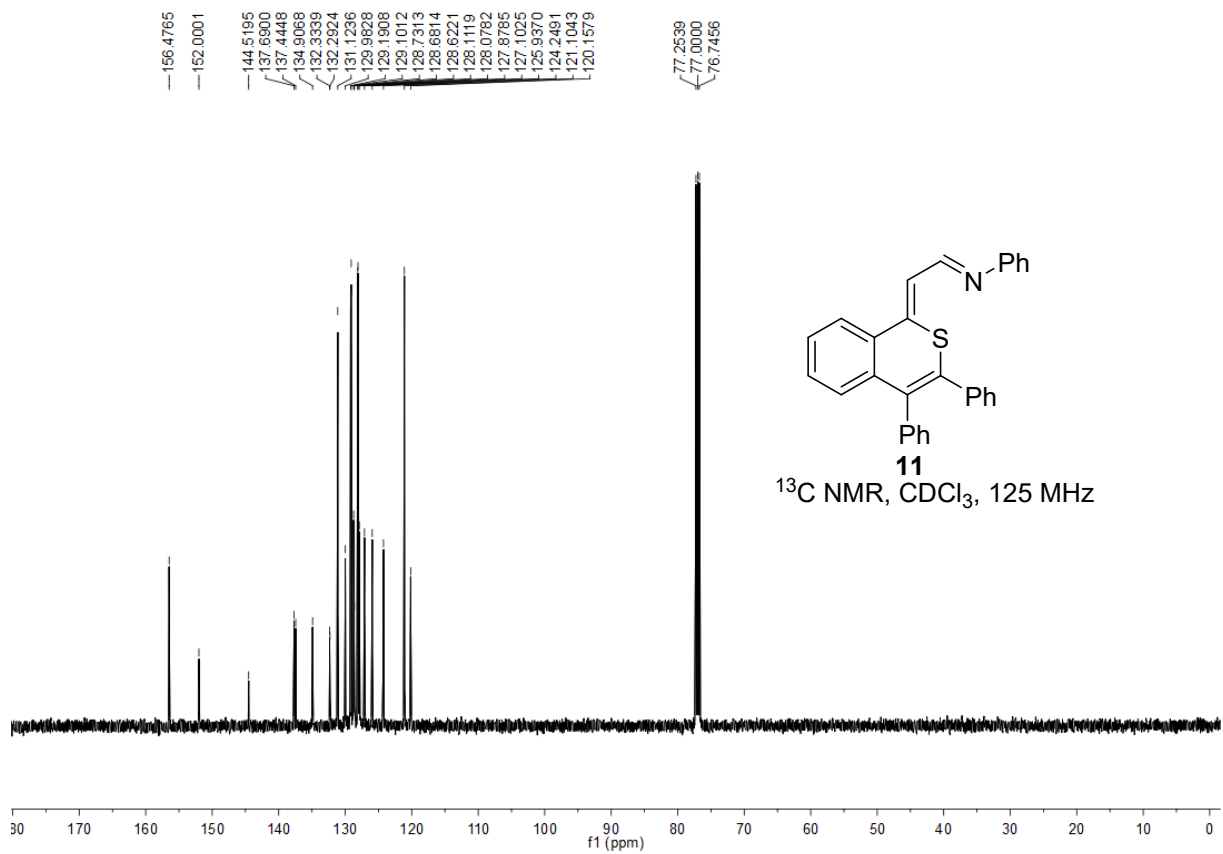

Supplement: d5cc01269d1.pdf [file d5cc01269d1.pdf]
